# Supplementary material for: When UDG and hAPE1 Meet Cyclopurines. How (5′R) and (5′S) 5′,8-Cyclo-2′-deoxyadenosine and 5′,8-Cyclo-2′-deoxyguanosine Affect UDG and hAPE1 Activity?
Source: MDPI journal article supplement (doi:10.3390/molecules26175177), 2021-08-26
Supplement: s1 [file s1]

# **When UDG and hAPE1 meet Cyclopurines. How (5'*R*) and (5'*S*) 5',8-cyclo-2'-deoxyadenosine and 5',8-cyclo-2'-deoxyguanosine affect UDG and hAPE1 activity?**

## **Supplementary Materials**

### Table of contents

| Page  | Item           | Description                                                             |
|-------|----------------|-------------------------------------------------------------------------|
| 2     | Table S1       | Complete sequences of applied oligonucleotides                          |
| 3     | Figure S1      | Efficiency of oligo labeling and hybridization                          |
| 4-5   | Figure S2-S3   | Visualization of control cleavage assay of oligonucleotides             |
| 6-33  | Figure S4-S45  | Autoradiograms and graphs of cleavage assays of oligonucleotides        |
| 34-48 | Figure S46-S60 | Mass spectra of applied oligonucleotides                                |
| 49-62 | Figure S61-S88 | Cleavage assays of oligonucleotides: graphs including error bars        |
| 63-72 | Table S2-S3    | Raw numerical data of densitometry                                      |
| 73    | Figure S89     | Schematic representation of cleavage assays and control cleavage assays |

Table S1. Complete sequences of applied oligonucleotides. Abbreviations mean the following: SX - (5'S)-5'8-cyclo-2'-deoxyadenosine; RX - (5'R)-5'8-cyclo-2'-deoxyadenosine; SY - (5'S)-5'8-cyclo-2'-deoxyguanosine; RY - (5'R)-5'8-cyclo-2'-deoxyguanosine; U – 2'-deoxyuridine.

| Oligo          | End | Sequence                                                              | End |
|----------------|-----|-----------------------------------------------------------------------|-----|
| Matrix SA      | 3'  | GAGAACAGTCCTTATAACAGAGATACGAGGGTGGTTTCCG                              | 5'  |
| Matrix SA-A    | 3'  | GAGAACAGTCCTTATAACAGAGATACGAAGGTGGTTTCCG                              | 5'  |
| Matrix SG      | 3'  | GAGAACAGTCCTTATAACAGAGACACGAGGGTGGTTTCCG                              | 5'  |
| Matrix SG-A    | 3'  | GAGAACAGTCCTTATAACAGAGACACGAAGGTGGTTTCCG                              | 5'  |
| dU0            | 5'  | CTCTTGT CAGGAATATTGTC <b>U</b> CTATGCTCCCACCAAAGGC                    | 3'  |
| dU(-5)(+5)dA   | 5'  | CTCTTGT CAGGAATATTG <b>U</b> CTCTATGCT <b>U</b> CCACCAAAGGC           | 3'  |
| dU(-5)ScdA     | 5'  | CTCTTGT CAGGAATATTG <b>U</b> CTCT <b>SX</b> TGCTCCCACCAAAGGC          | 3'  |
| dU(+5)ScdA     | 5'  | CTCTTGT CAGGAATATTGTCTCT <b>SX</b> TGCT <b>U</b> CCACCAAAGGC          | 3'  |
| dU(-5)(+5)ScdA | 5'  | CTCTTGT CAGGAATATTG <b>U</b> CTCT <b>SX</b> TGCT <b>U</b> CCACCAAAGGC | 3'  |
| dU(-5)RcdA     | 5'  | CTCTTGT CAGGAATATTG <b>U</b> CTCT <b>RX</b> TGCTCCCACCAAAGGC          | 3'  |
| dU(+5)RcdA     | 5'  | CTCTTGT CAGGAATATTGTCTCT <b>RX</b> TGCT <b>U</b> CCACCAAAGGC          | 3'  |
| dU(-5)(+5)RcdA | 5'  | CTCTTGT CAGGAATATTG <b>U</b> CTCT <b>RX</b> TGCT <b>U</b> CCACCAAAGGC | 3'  |
| dU(-5)ScdG     | 5'  | CTCTTGT CAGGAATATTG <b>U</b> CTCT <b>SY</b> TGCTCCCACCAAAGGC          | 3'  |
| dU(+5)ScdG     | 5'  | CTCTTGT CAGGAATATTGTCTCT <b>SY</b> TGCT <b>U</b> CCACCAAAGGC          | 3'  |
| dU(-5)(+5)ScdG | 5'  | CTCTTGT CAGGAATATTG <b>U</b> CTCT <b>SY</b> TGCT <b>U</b> CCACCAAAGGC | 3'  |
| dU(-5)RcdG     | 5'  | CTCTTGT CAGGAATATTG <b>U</b> CTCT <b>RY</b> TGCTCCCACCAAAGGC          | 3'  |
| dU(+5)RcdG     | 5'  | CTCTTGT CAGGAATATTGTCTCT <b>RY</b> TGCT <b>U</b> CCACCAAAGGC          | 3'  |
| dU(-5)(+5)RcdG | 5'  | CTCTTGT CAGGAATATTG <b>U</b> CTCT <b>RY</b> TGCT <b>U</b> CCACCAAAGGC | 3'  |

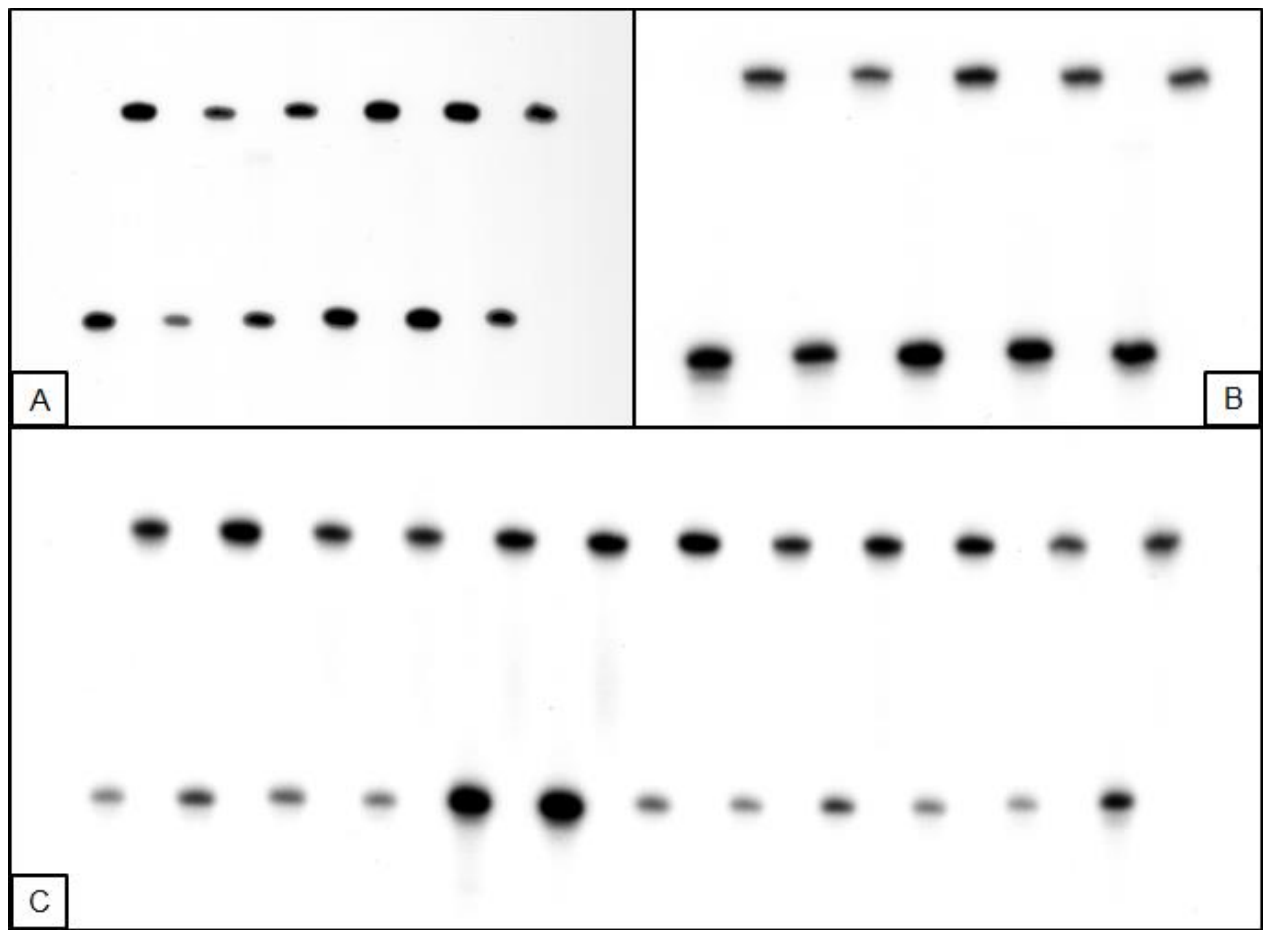

Figure S1. Visualization of efficient labeling (ssDNA) and hybridization (dsDNA) of oligonucleotides. Upper row of bands show 40-mer ds-DNA, lower row of bands show 40-mer ss-DNA. The order of tested oligonucleotides was as follows: dU(-5)ScdA (lanes 5,6), dU(-5)RcdA (lanes 9,10) (A); dU0 (lanes 1,2) (B); dU(-5)(+5)dA (lanes 3,4), dU(+5)ScdA (lanes 5,6), dU(-5)(+5)ScdA (lanes 7,8), dU(+5)RcdA (lanes 9,10), dU(-5)(+5)RcdA (lanes 11,12), dU(-5)ScdG (lanes 13,14), dU(+5)ScdG (lanes 15,16), dU(-5)(+5)ScdG (lanes 17,18), dU(-5)RcdG (lanes 19,20), dU(+5)RcdG (lanes 21,22), dU(-5)(+5)RcdG (lanes 23,24) (C).

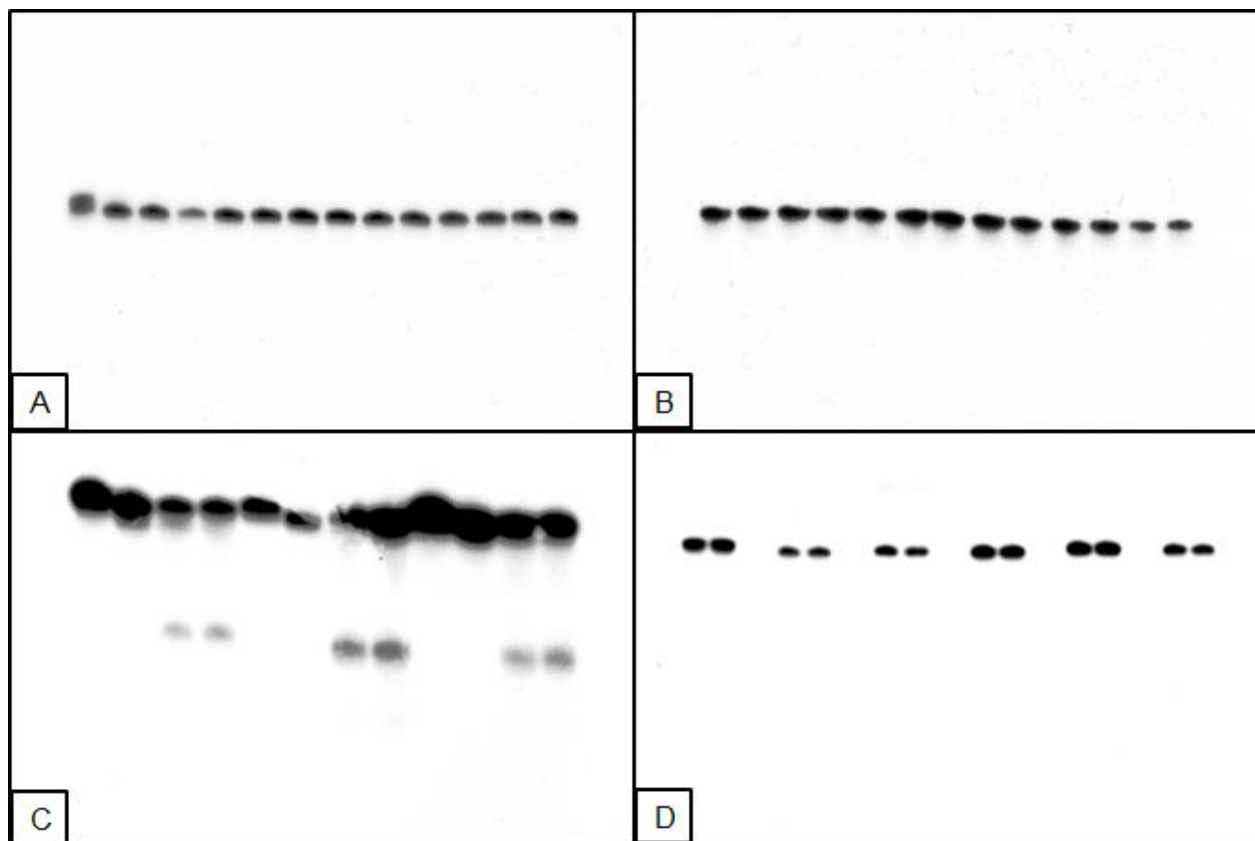

Figure S2. Visualization of control cleavage assays of oligonucleotides by 0.5U UDG (A,C) or 0.5U hAPE1 (B,C). Single row of bands indicate no cleavage of ds-DNA by the enzymes used separately. (A) cleavage of dU0 by 0.5U UDG, (B) cleavage of dU0 by 0.5U hAPE1. (A) show 14 lanes each, which correspond to reaction times 0, 1, 5, 10, 15, 20, 25, 30, 35, 40, 45, 50, 55, and 60 min starting from the left. (B) show 13 lanes each, which correspond to reaction times 0, 1, 5, 10, 15, 20, 25, 30, 60, 90, 120, 150 and 180 min starting from the left. (C) cleavage of dU(-5)ScdA (lane 5: 0 min; lane 6: 60 min) and dU(-5)RcdA (lane 9: 0 min; lane 10: 60 min) by 0.5U UDG. (D) cleavage of dU(-5)ScdA (lane 7: 0 min; lane 8: 60 min) and dU(-5)RcdA (lane 13: 0 min; lane 14: 60 min) by 0.5U hAPE1.

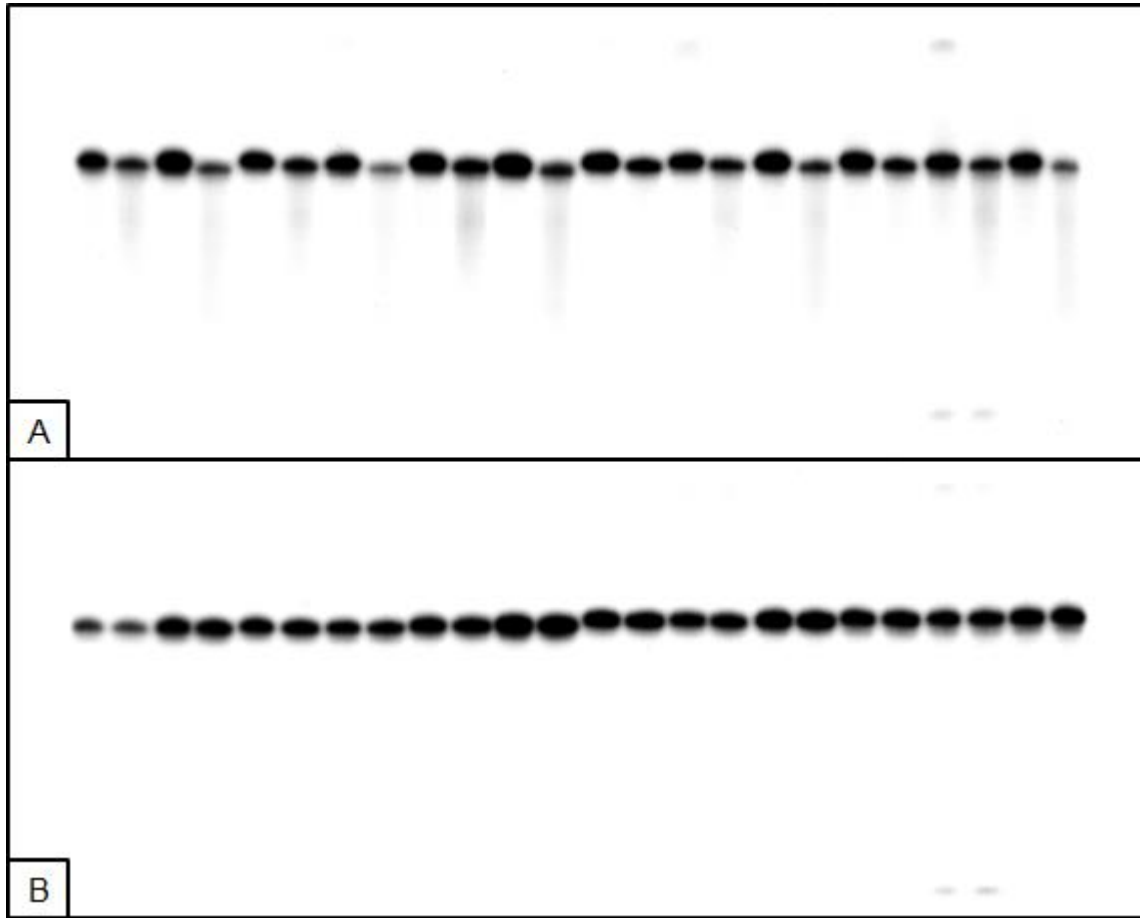

**Figure S3.** Visualization of control cleavage assays of oligonucleotides by 0.5U UDG (A) or 0.5U hAPE1 (B). Single row of bands indicate no cleavage of ds-DNA by the enzymes used separately. For each oligonucleotide the reaction times were 0 min (left lane of the pair) and 60 min (right lane of the pair) (A) or 0 min (left lane of the pair) and 180 min (right lane of the pair) (B). The order of tested oligonucleotides on both autoradiograms (A) and (B) was as follows: dU(-5)(+5)dA (lanes 3,4), dU(+5)ScdA (lanes 5,6), dU(-5)(+5)ScdA (lanes 7,8), dU(+5)RcdA (lanes 9,10), dU(-5)(+5)RcdA (lanes 11,12), dU(-5)ScdG (lanes 13,14), dU(+5)ScdG (lanes 15,16), dU(-5)(+5)ScdG (lanes 17,18), dU(-5)RcdG (lanes 19,20), dU(+5)RcdG (lanes 21,22), dU(-5)(+5)RcdG (lanes 23,24).

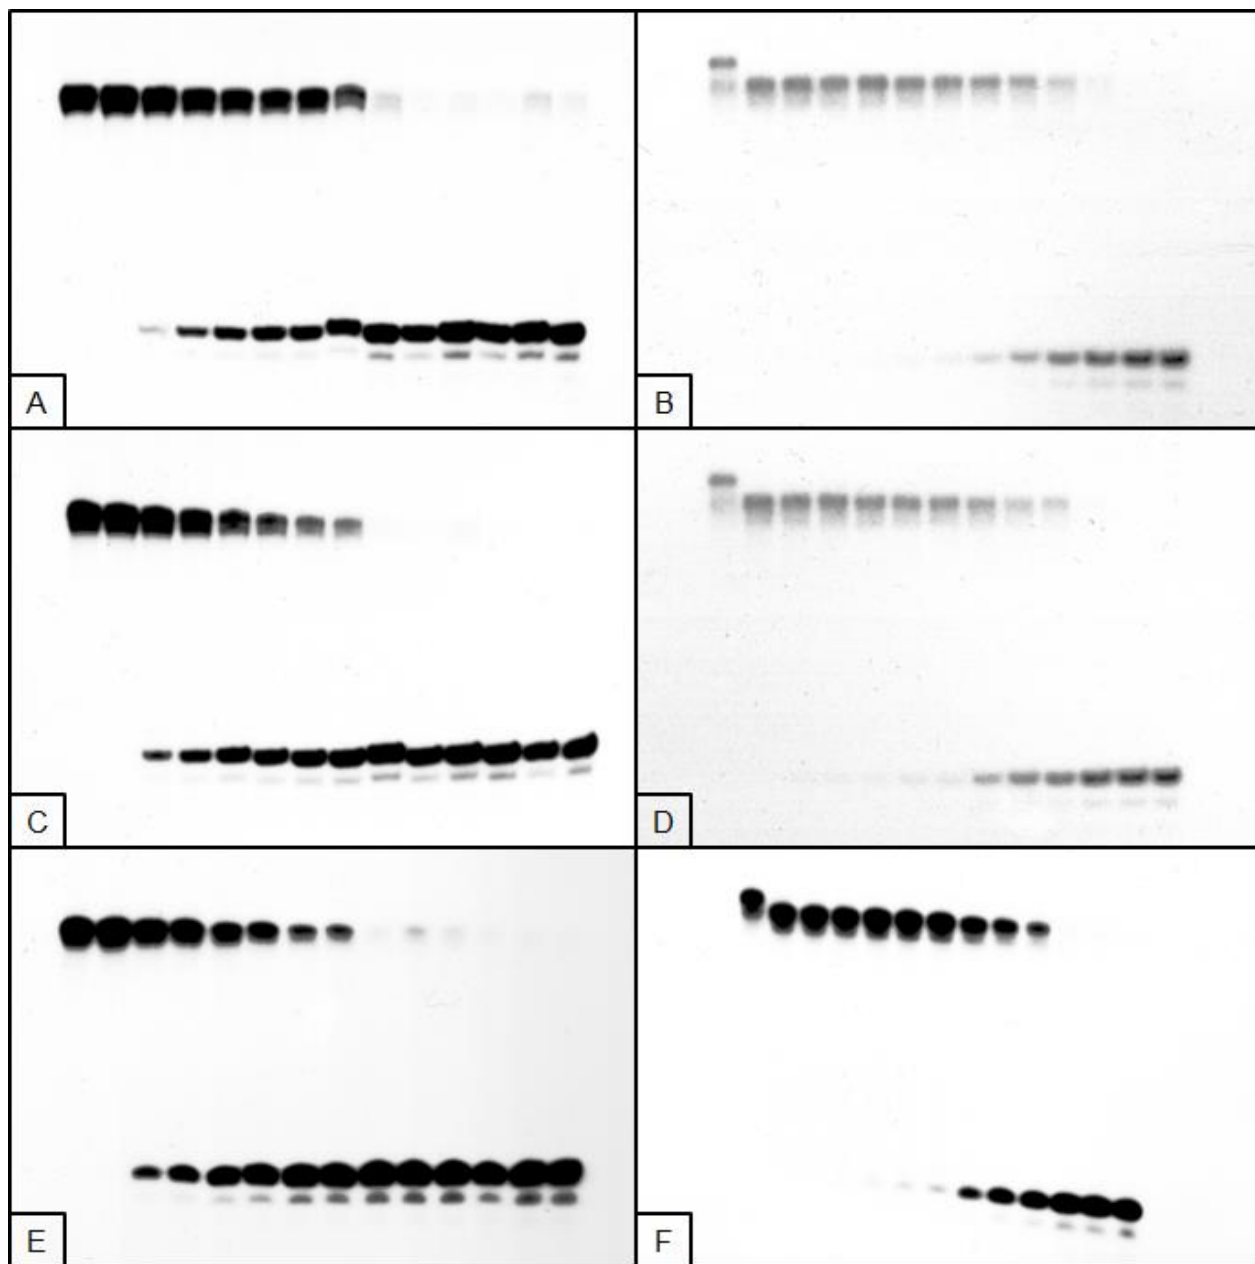

Figure S4. Cleavage assay of dU0 by 0.02U UDG and 0.5U hAPE1 (A,C,E) or 0.5U UDG and 0.02U hAPE1 (B,D,F). (A), (C) and (E) show 14 lanes each, which correspond to reaction times 0, 1, 5, 10, 15, 20, 25, 30, 35, 40, 45, 50, 55, and 60 min starting from the left. (B), (D) and (F) show 13 lanes each, which correspond to reaction times 0, 1, 5, 10, 15, 20, 25, 30, 60, 90, 120, 150 and 180 min starting from the left.

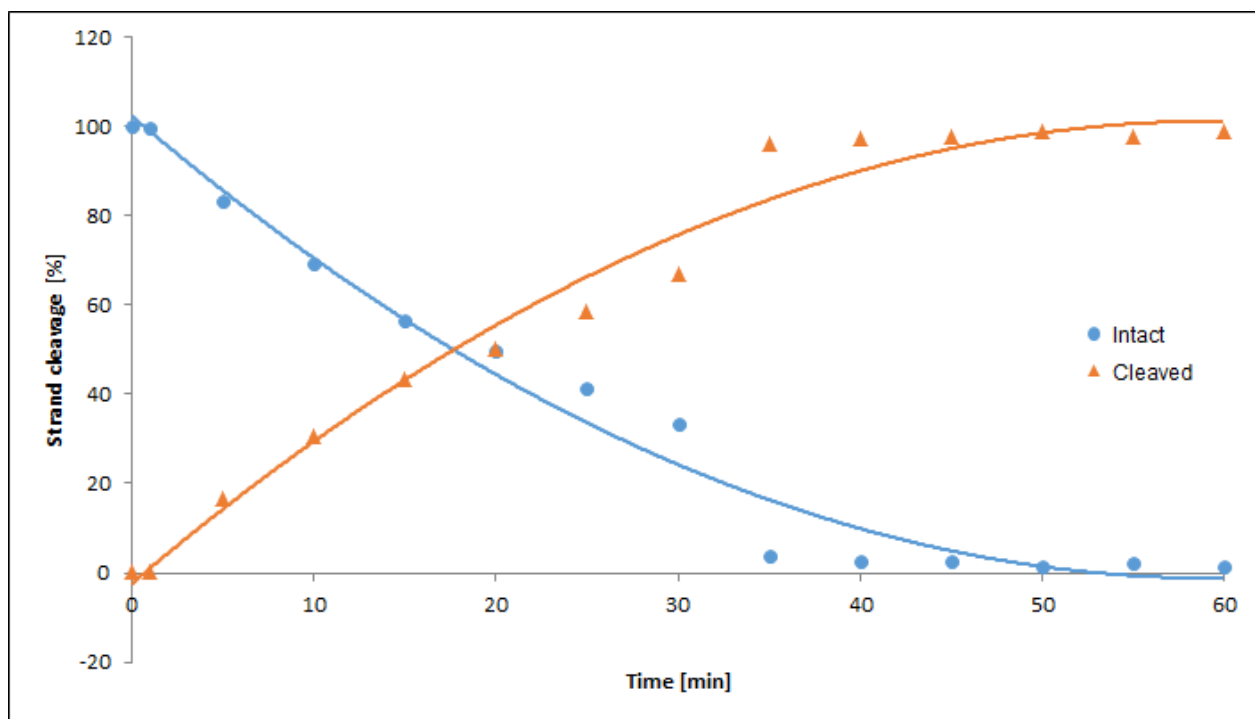

Figure S5. Cleavage assay of dU0 by 0.02U UDG and 0.5U hAPE1. The quantity loss of intact ssDNA (blue) and the quantity increase of SSB-DNA (orange).

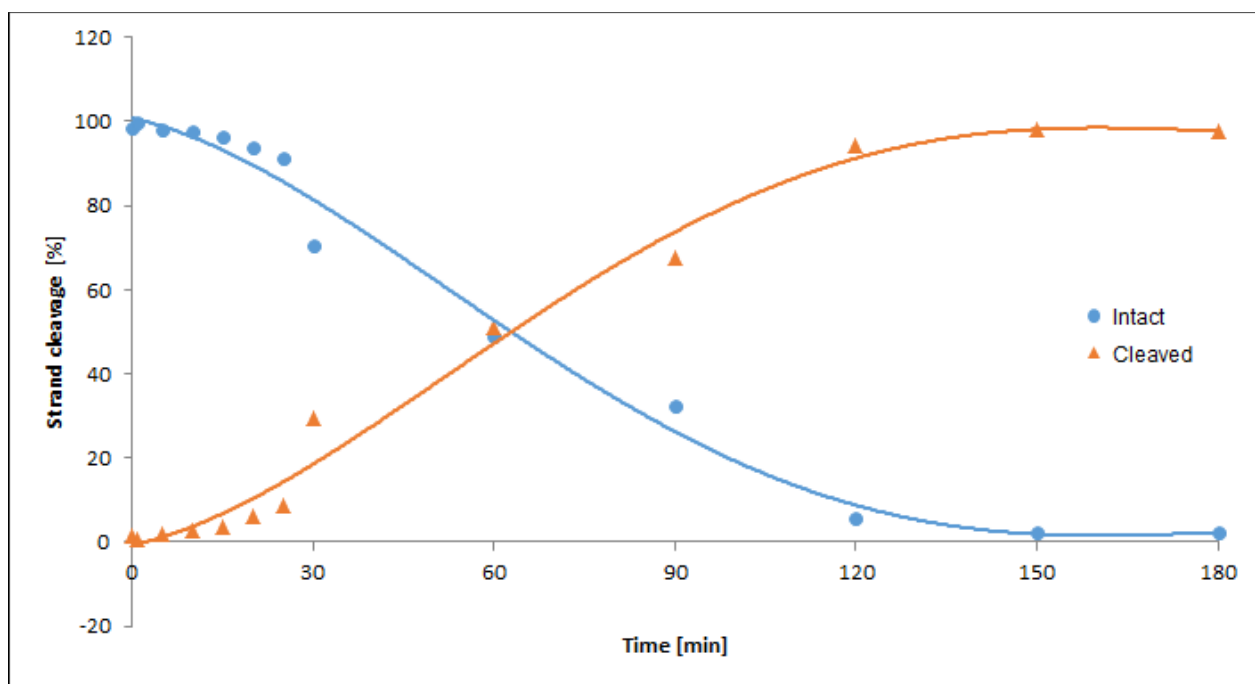

Figure S6. Cleavage assay of dU0 by 0.5U UDG and 0.02U hAPE1. The quantity loss of intact ssDNA (blue) and the quantity increase of SSB-DNA (orange).

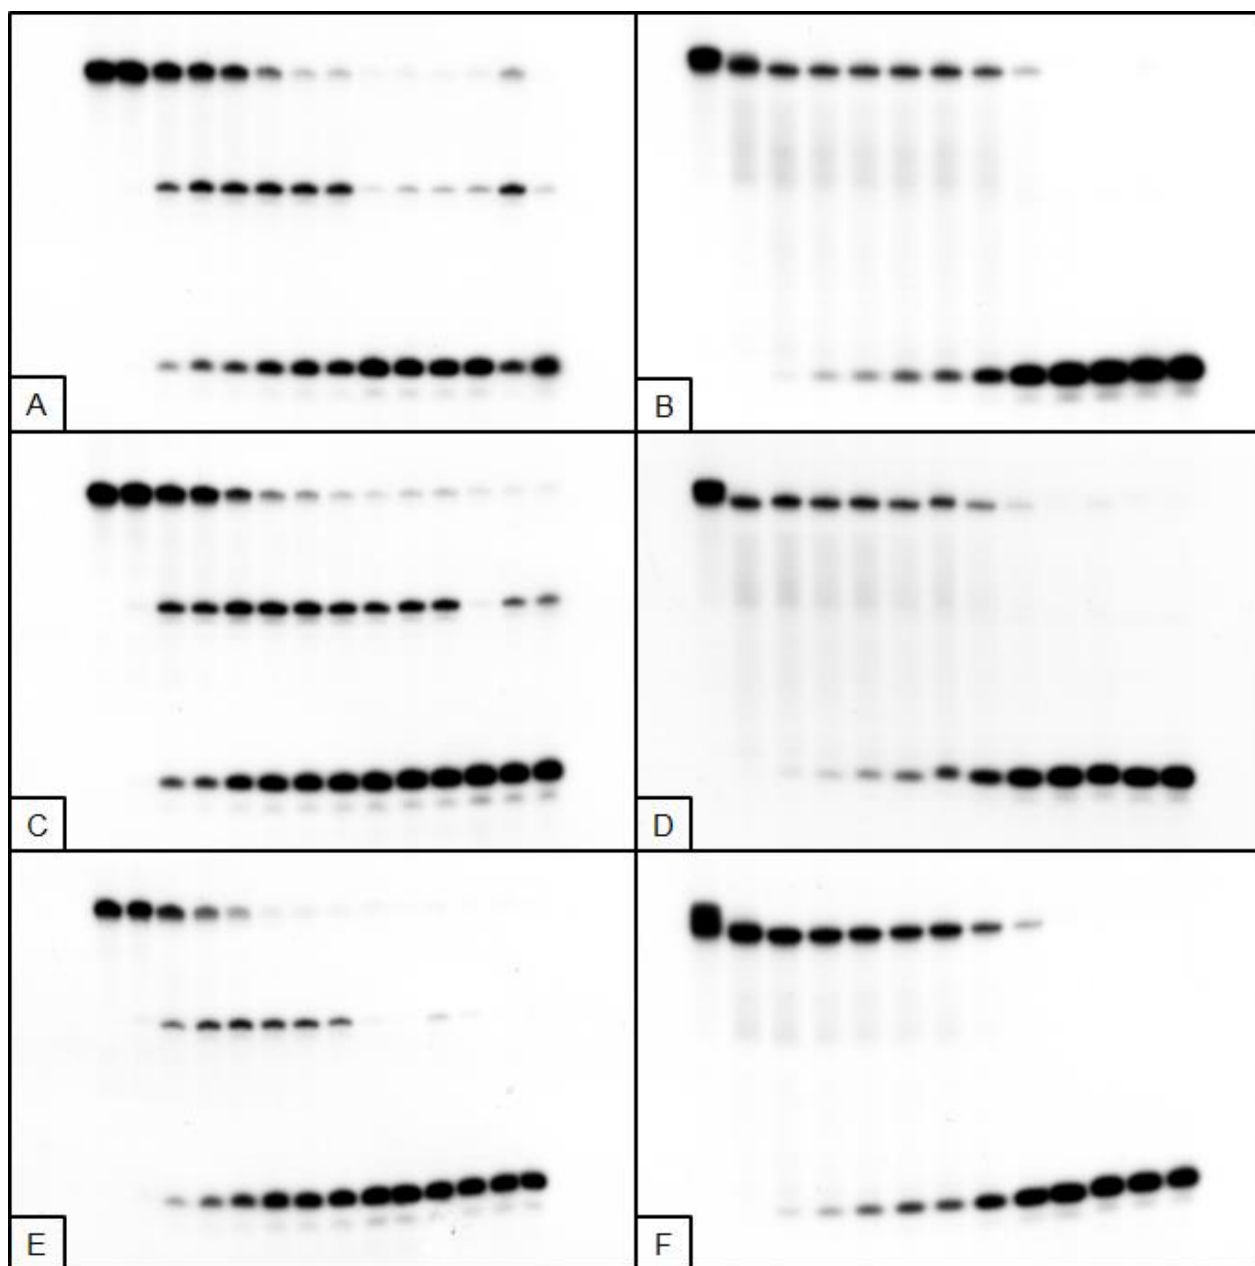

Figure S7. Cleavage assay of dU(-5)(+5)dA by 0.02U UDG and 0.5U hAPE1 (A,C,E) or 0.5U UDG and 0.02U hAPE1 (B,D,F). (A), (C) and (E) show 14 lanes each, which correspond to reaction times 0, 1, 5, 10, 15, 20, 25, 30, 35, 40, 45, 50, 55, and 60 min starting from the left. (B), (D) and (F) show 13 lanes each, which correspond to reaction times 0, 1, 5, 10, 15, 20, 25, 30, 60, 90, 120, 150 and 180 min starting from the left.



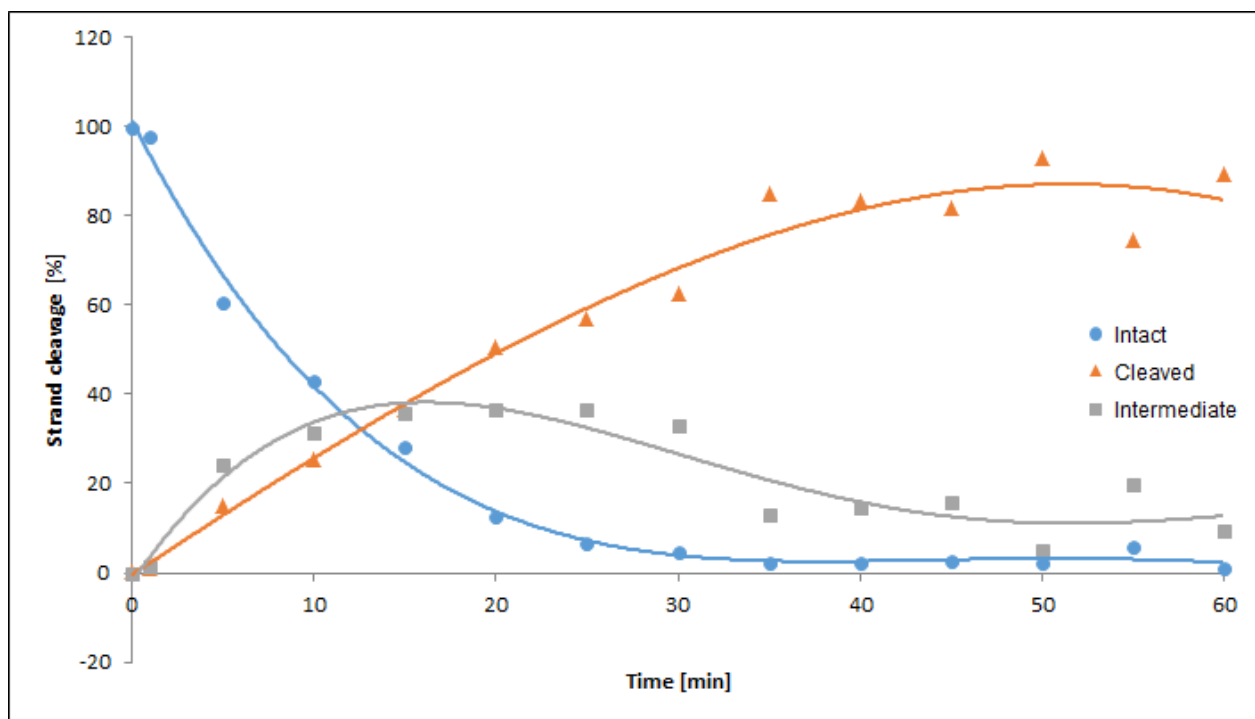

Figure S8. Cleavage assay of dU(-5)(+5)dA by 0.02U UDG and 0.5U hAPE1. The quantity loss of intact ssDNA (blue), the quantity increase of SSB-DNA (orange) and an intermediate oligo fragment (grey).

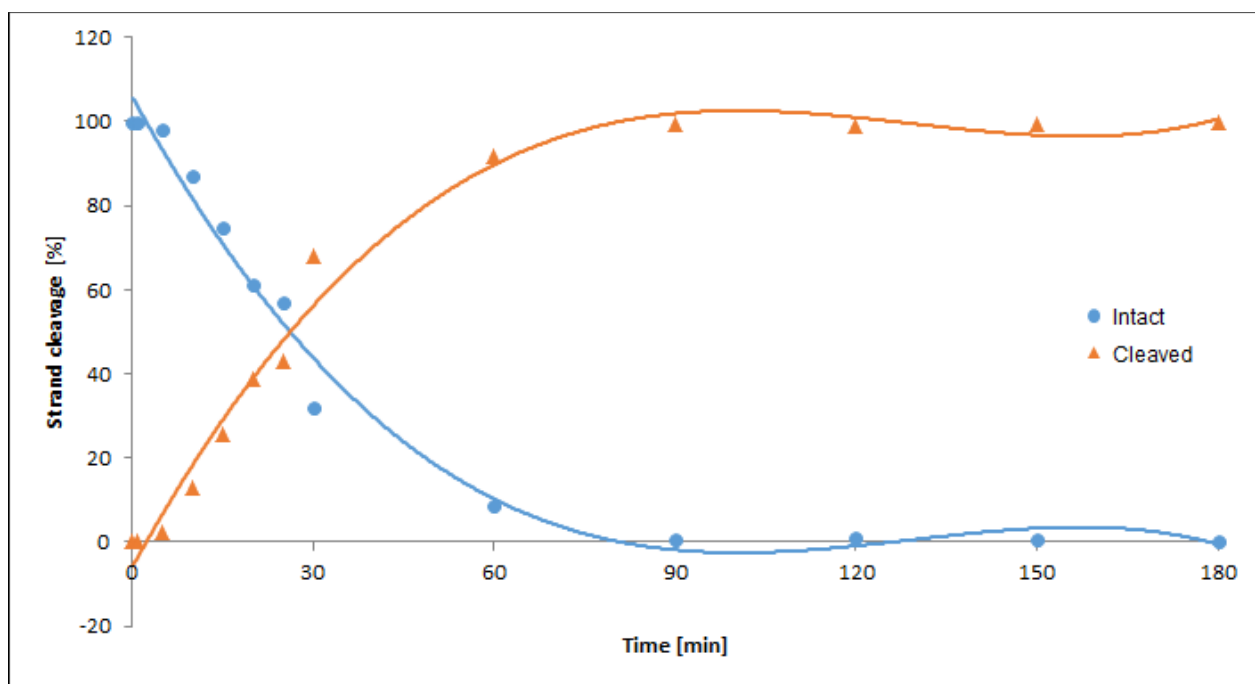

Figure S9. Cleavage assay of dU(-5)(+5)dA by 0.5U UDG and 0.02U hAPE1. The quantity loss of intact ssDNA (blue) and the quantity increase of SSB-DNA (orange).

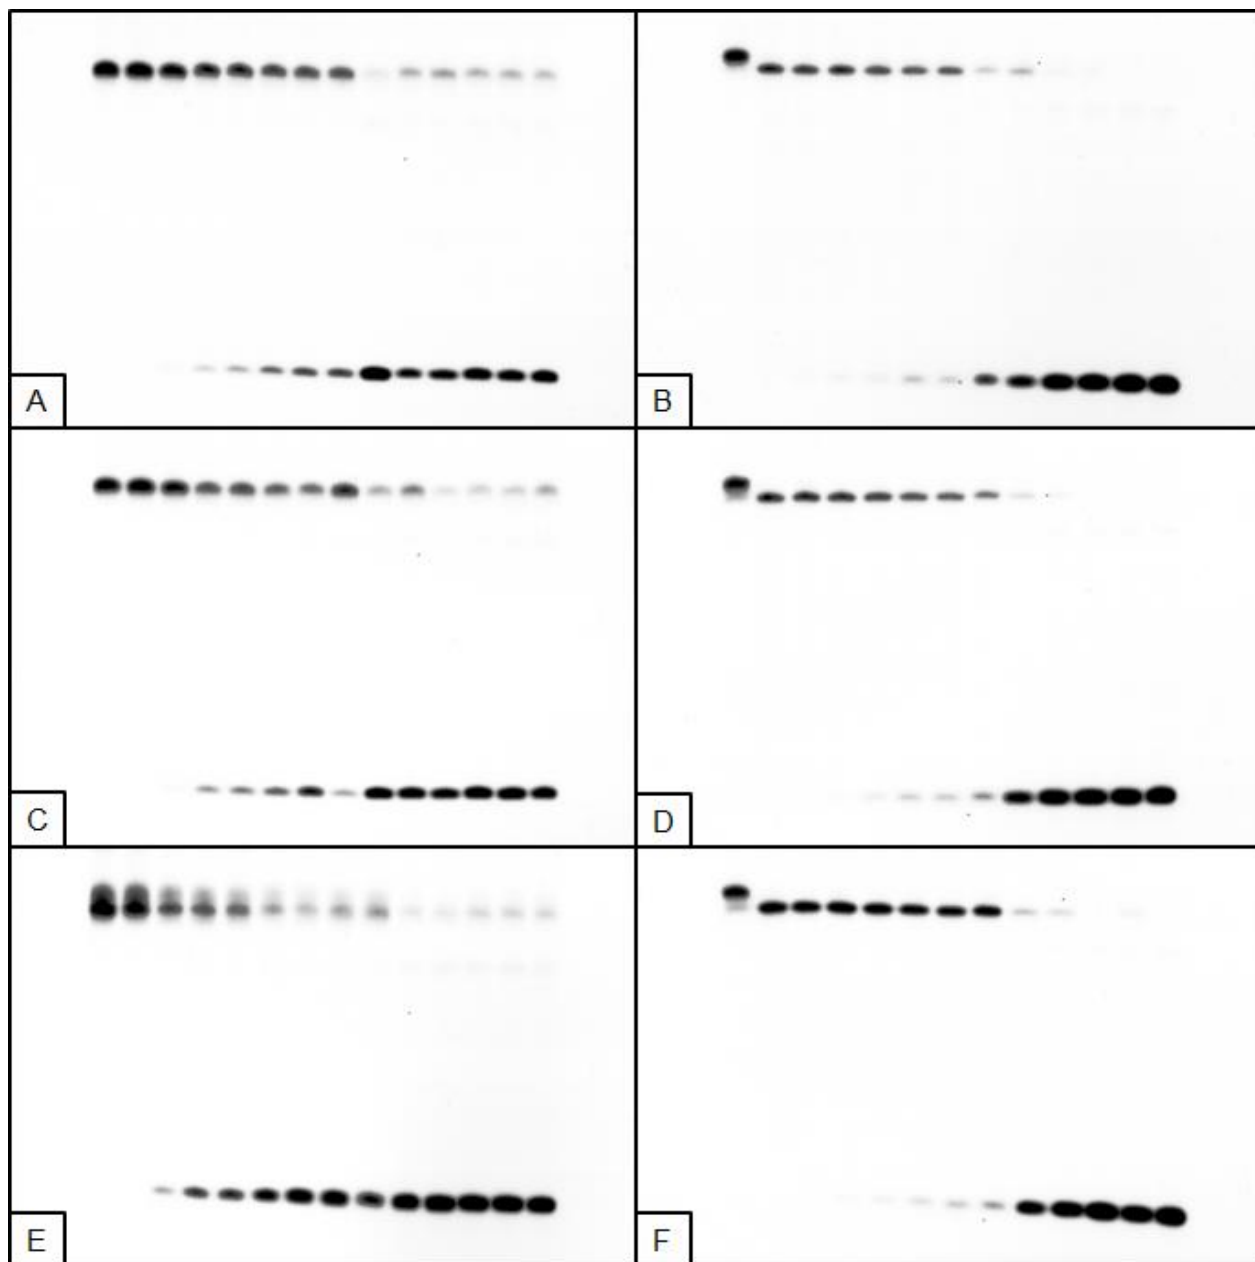

**Figure S10.** Cleavage assay of dU(-5)ScdA by 0.02U UDG and 0.5U hAPE1 (A,C,E) or 0.5U UDG and 0.02U hAPE1 (B,D,F). (A), (C) and (E) show 14 lanes each, which correspond to reaction times 0, 1, 5, 10, 15, 20, 25, 30, 35, 40, 45, 50, 55, and 60 min starting from the left. (B), (D) and (F) show 13 lanes each, which correspond to reaction times 0, 1, 5, 10, 15, 20, 25, 30, 60, 90, 120, 150 and 180 min starting from the left.

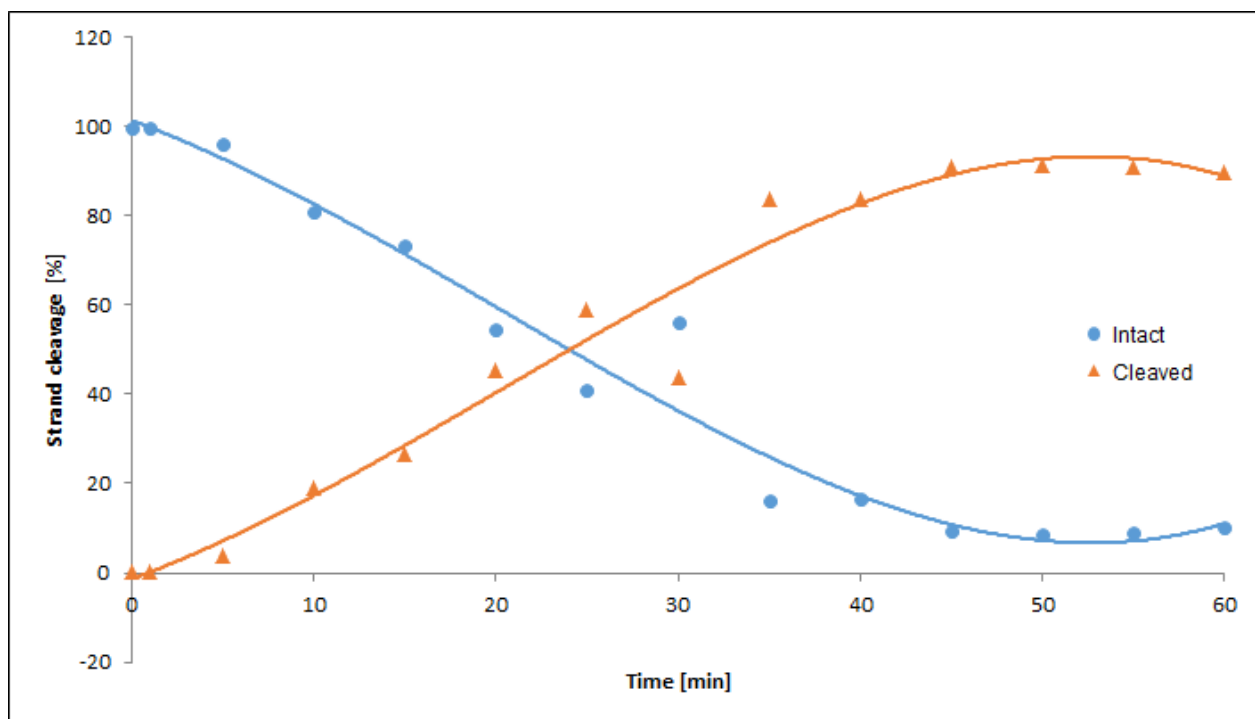

Figure S11. Cleavage assay of dU(-5)ScdA by 0.02U UDG and 0.5U hAPE1. The quantity loss of intact ssDNA (blue) and the quantity increase of SSB-DNA (orange).

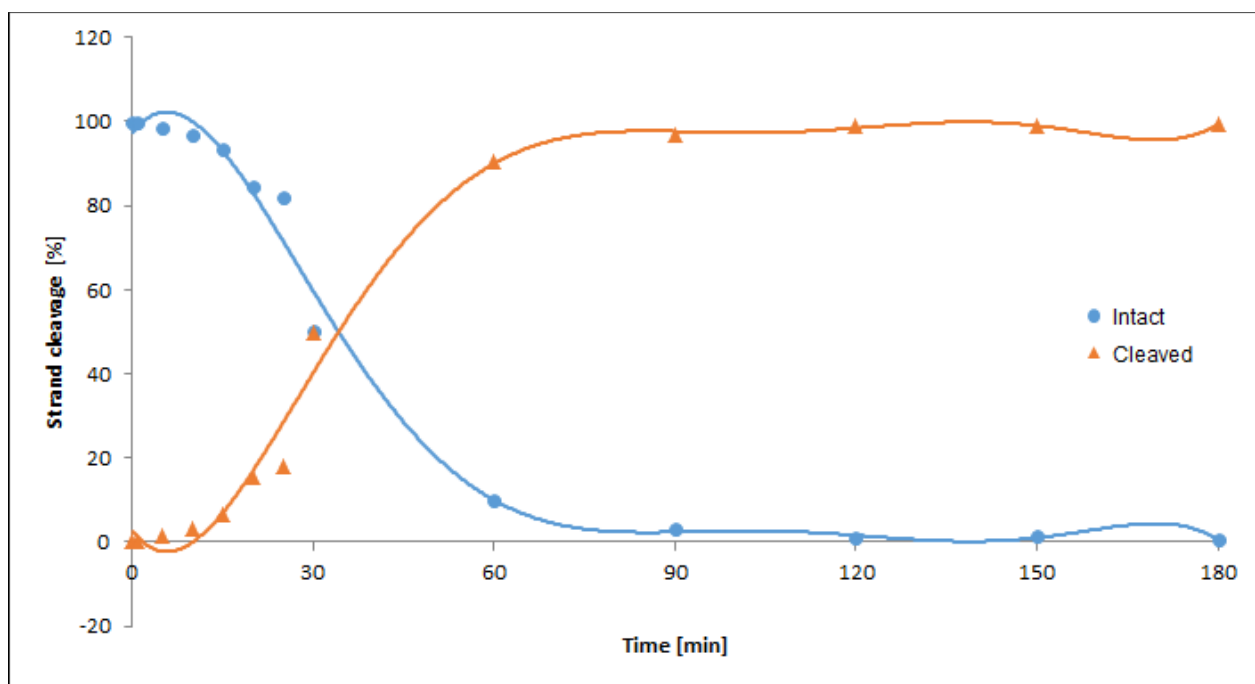

Figure S12. Cleavage assay of dU(-5)ScdA by 0.5U UDG and 0.02U hAPE1. The quantity loss of intact ssDNA (blue) and the quantity increase of SSB-DNA (orange).

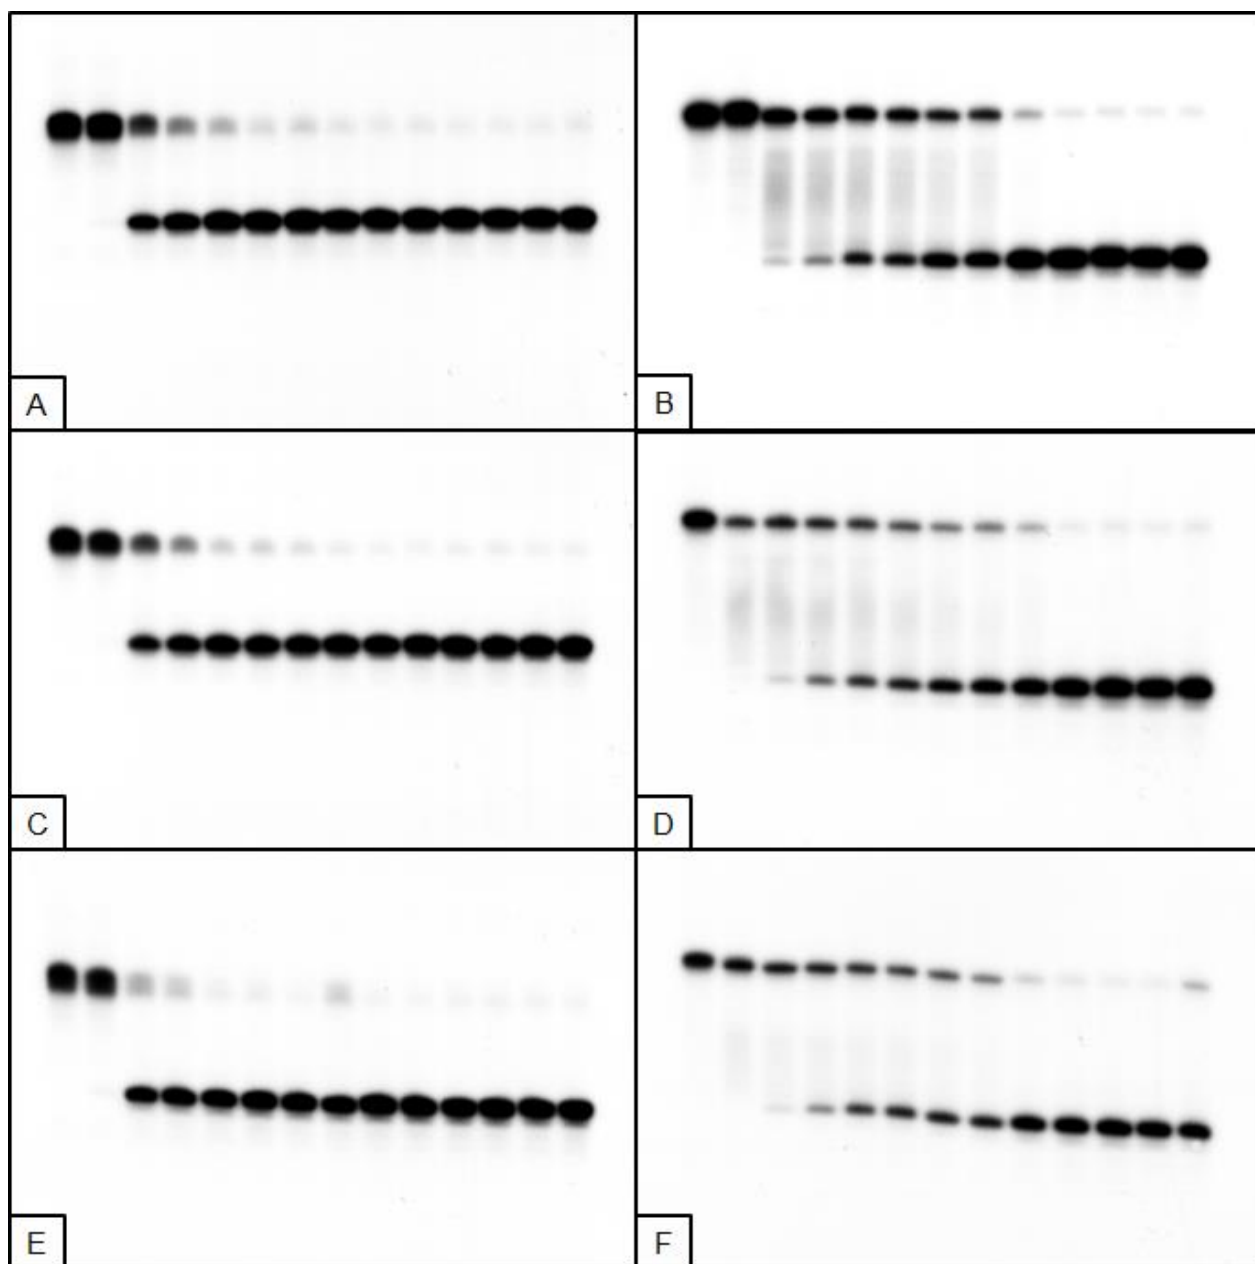

Figure S13. Cleavage assay of dU(+5)ScdA by 0.02U UDG and 0.5U hAPE1 (A,C,E) or 0.5U UDG and 0.02U hAPE1 (B,D,F). (A), (C) and (E) show 14 lanes each, which correspond to reaction times 0, 1, 5, 10, 15, 20, 25, 30, 35, 40, 45, 50, 55, and 60 min starting from the left. (B), (D) and (F) show 13 lanes each, which correspond to reaction times 0, 1, 5, 10, 15, 20, 25, 30, 60, 90, 120, 150 and 180 min starting from the left.

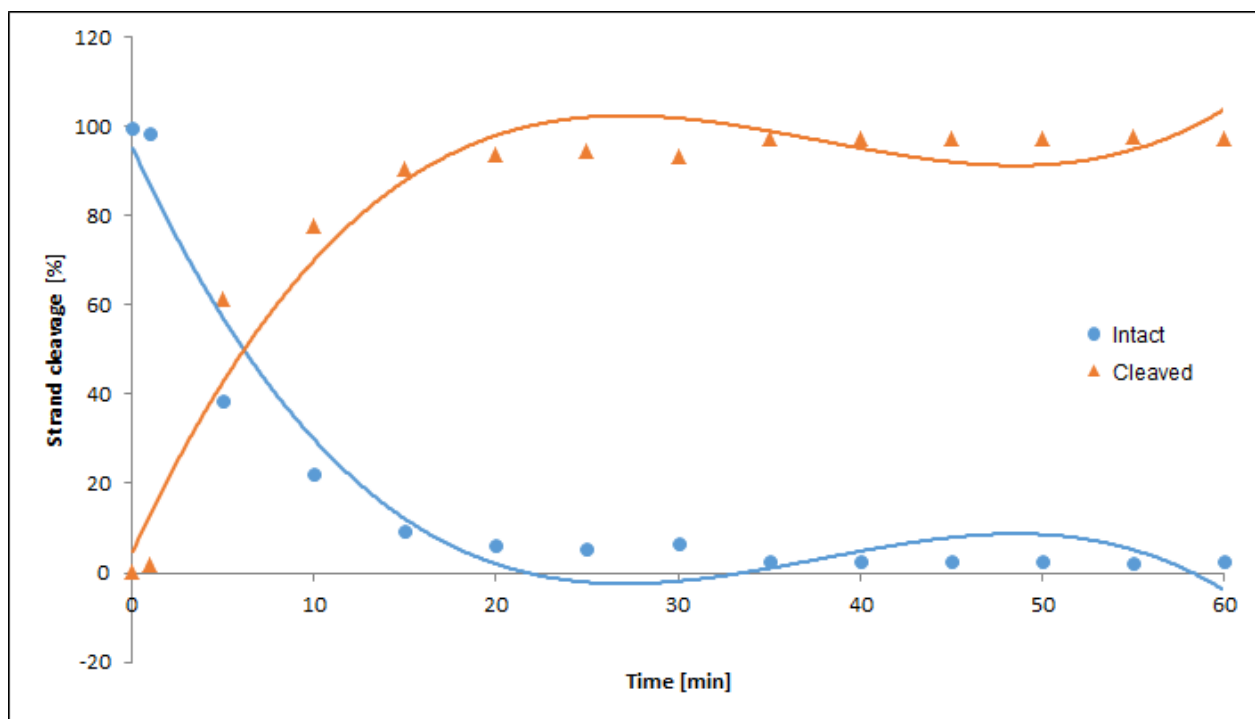

Figure S14. Cleavage assay of dU(+5)ScdA by 0.02U UDG and 0.5U hAPE1. The quantity loss of intact ssDNA (blue) and the quantity increase of SSB-DNA (orange).

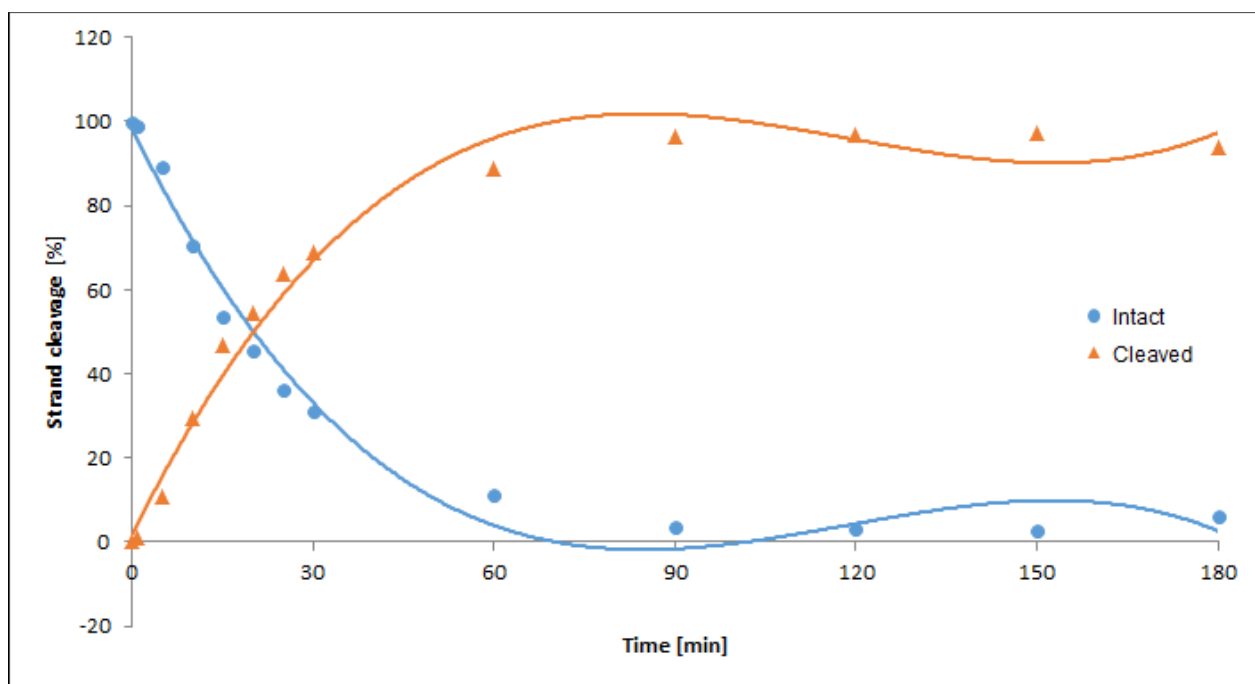

Figure S15. Cleavage assay of dU(+5)ScdA by 0.5U UDG and 0.02U hAPE1. The quantity loss of intact ssDNA (blue) and the quantity increase of SSB-DNA (orange).

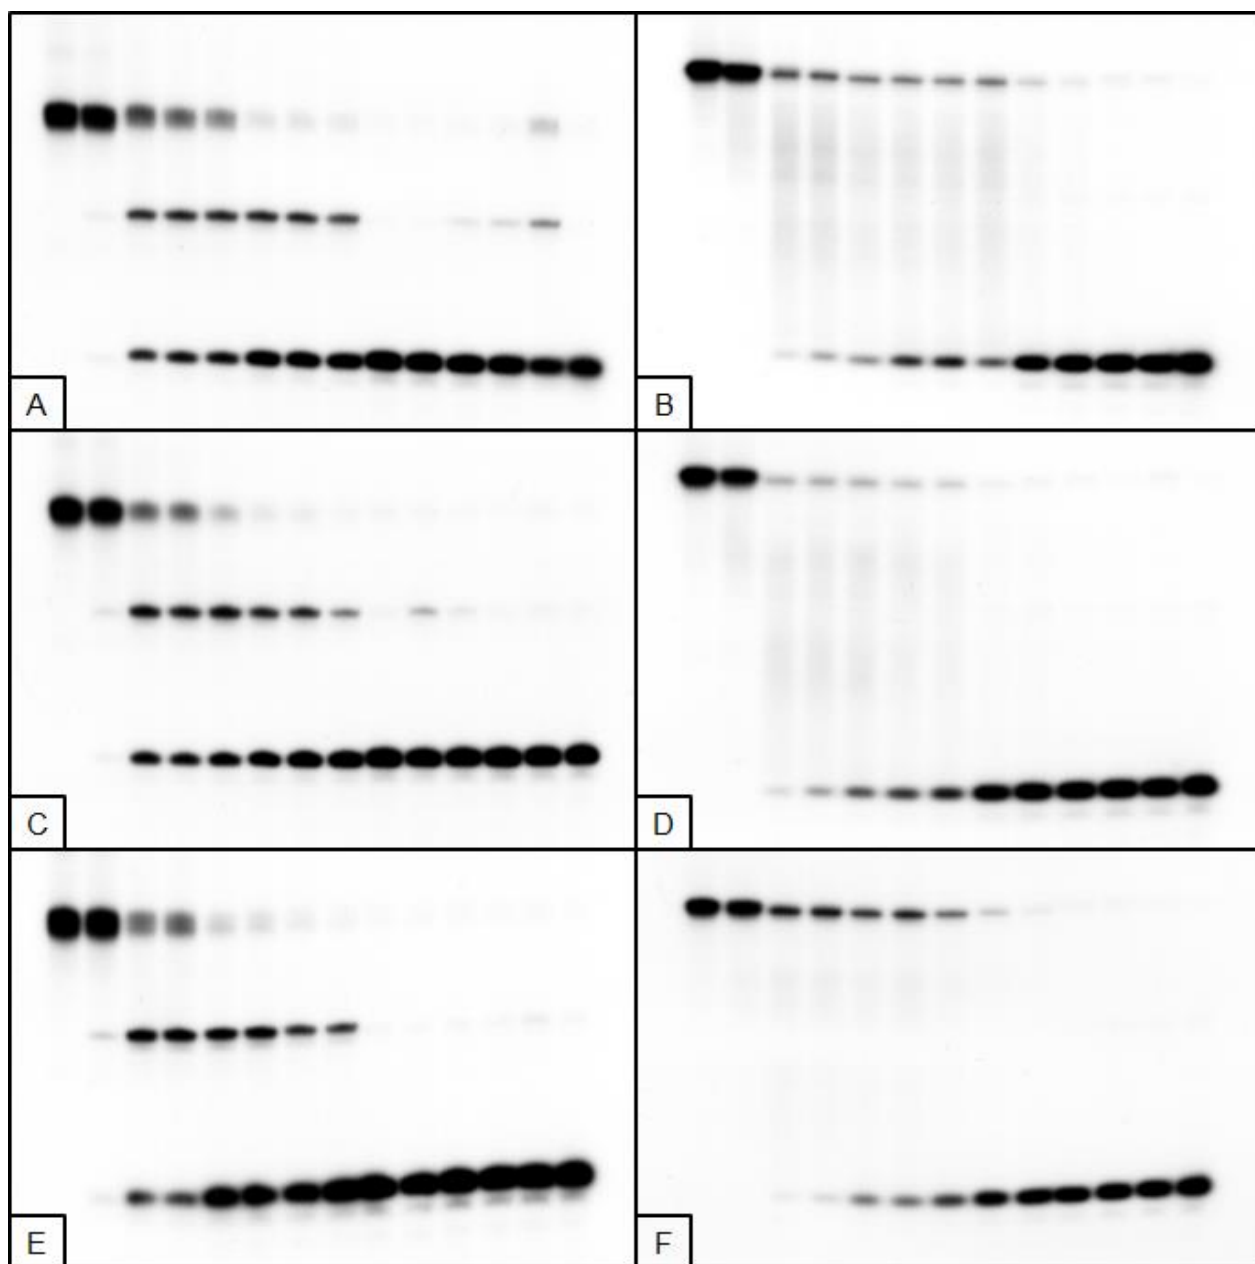

Figure S16. Cleavage assay of dU(-5)(+5)ScdA by 0.02U UDG and 0.5U hAPE1 (A,C,E) or 0.5U UDG and 0.02U hAPE1 (B,D,F). (A), (C) and (E) show 14 lanes each, which correspond to reaction times 0, 1, 5, 10, 15, 20, 25, 30, 35, 40, 45, 50, 55, and 60 min starting from the left. (B), (D) and (F) show 13 lanes each, which correspond to reaction times 0, 1, 5, 10, 15, 20, 25, 30, 60, 90, 120, 150 and 180 min starting from the left.

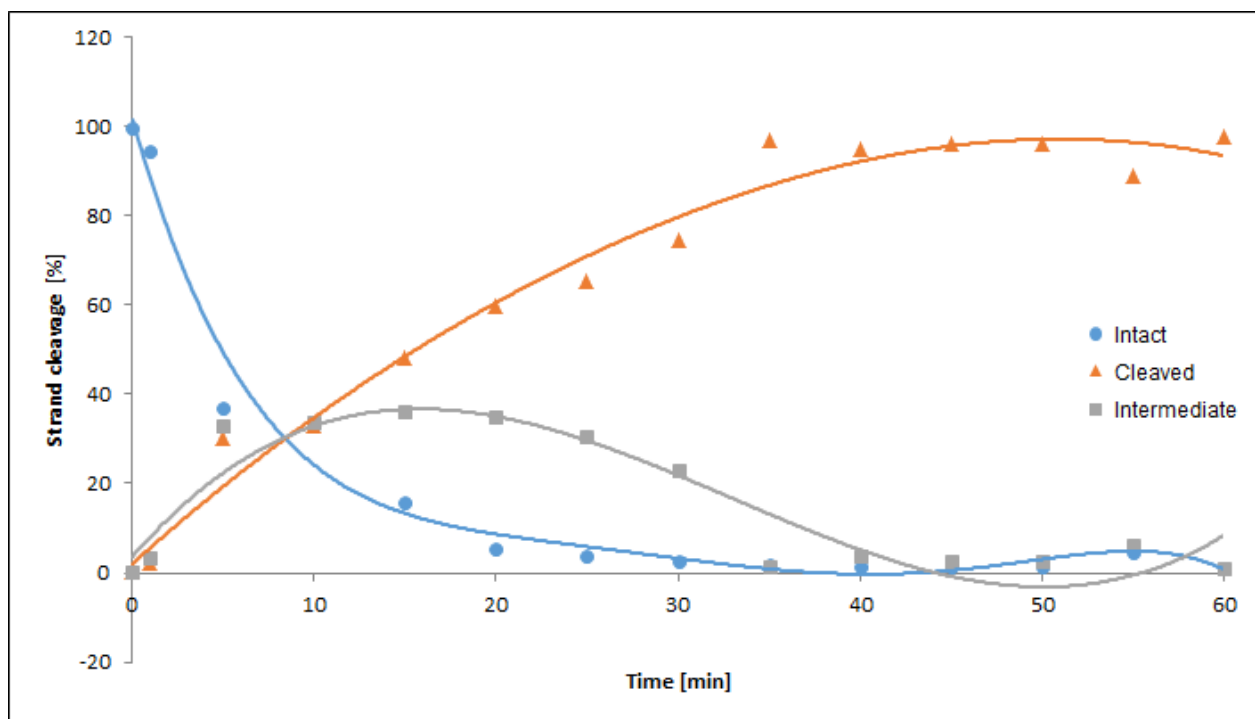

Figure S17. Cleavage assay of dU(-5)(+5)ScdA by 0.02U UDG and 0.5U hAPE1. The quantity loss of intact ssDNA (blue), the quantity increase of SSB-DNA (orange) and an intermediate oligo fragment (grey).

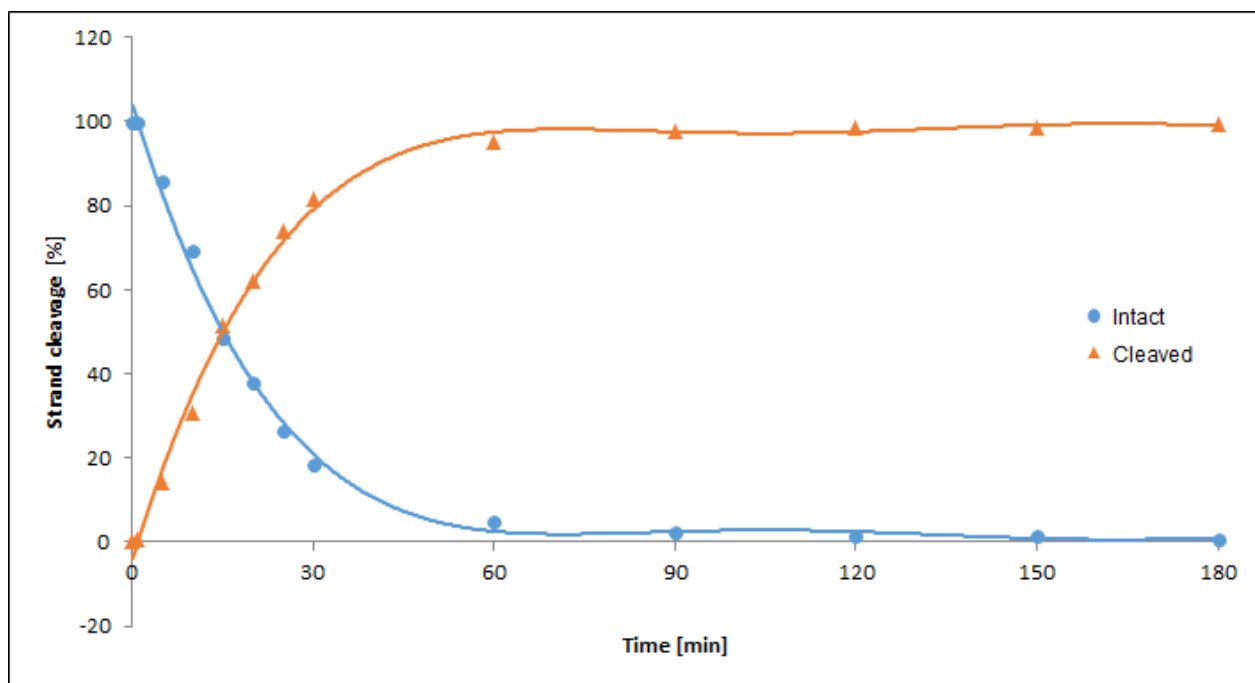

Figure S18. Cleavage assay of dU(-5)(+5)ScdA by 0.5U UDG and 0.02U hAPE1. The quantity loss of intact ssDNA (blue) and the quantity increase of SSB-DNA (orange).

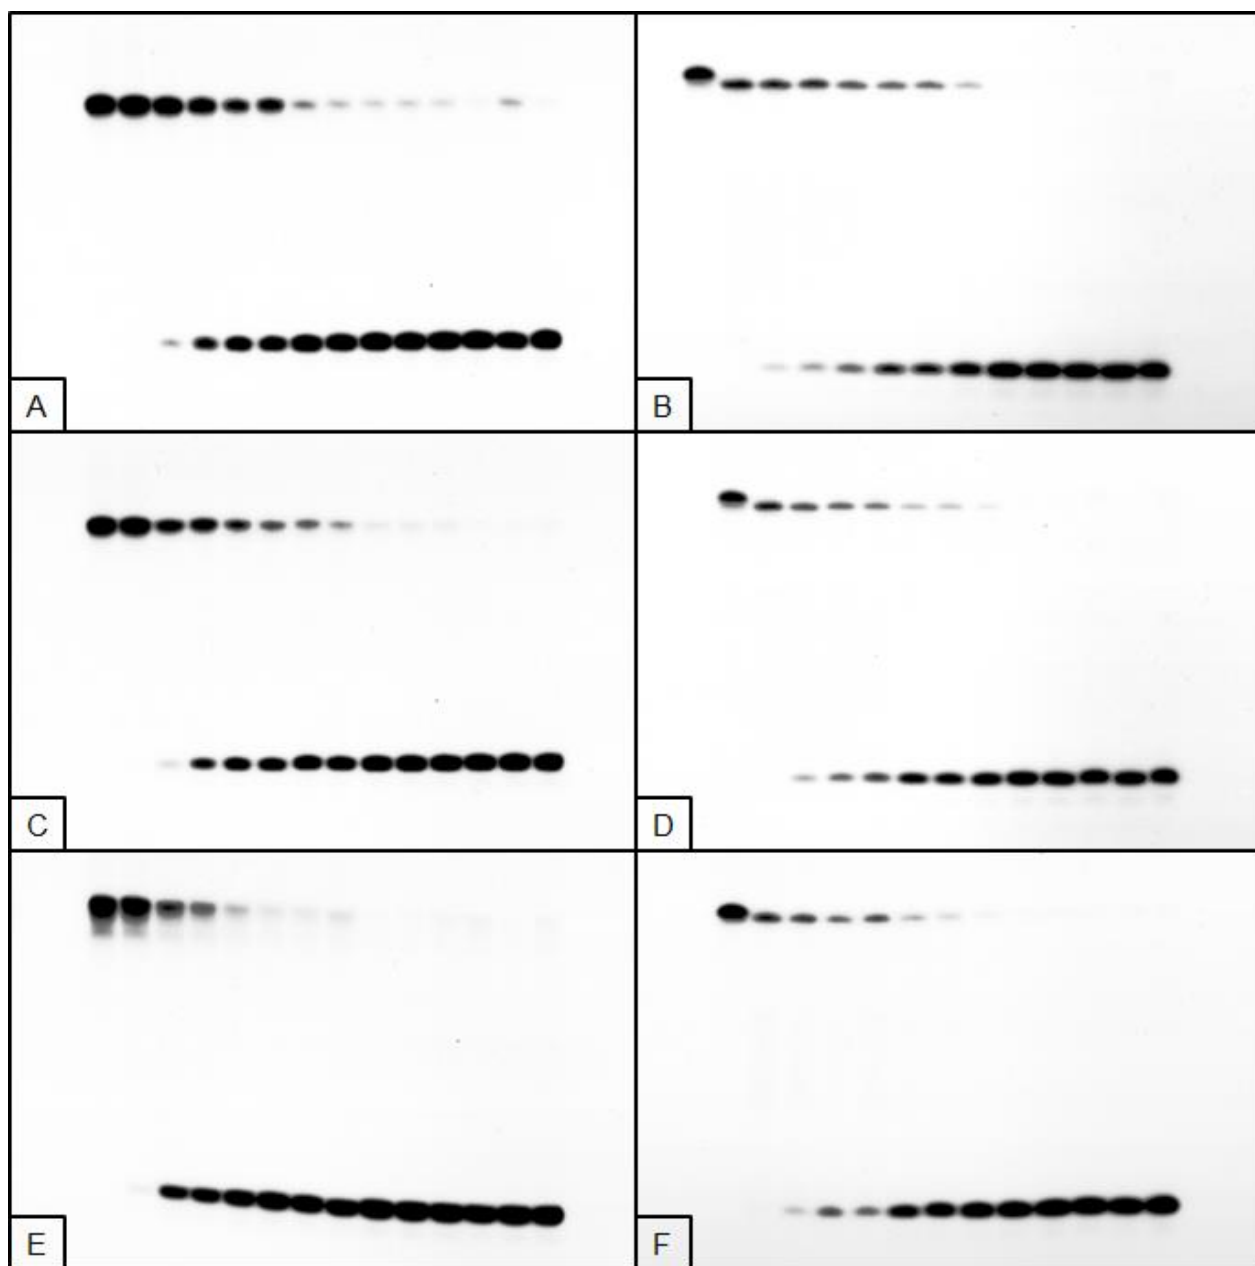

Figure S19. Cleavage assay of dU(-5)RcdA by 0.02U UDG and 0.5U hAPE1 (A,C,E) or 0.5U UDG and 0.02U hAPE1 (B,D,F). (A), (C) and (E) show 14 lanes each, which correspond to reaction times 0, 1, 5, 10, 15, 20, 25, 30, 35, 40, 45, 50, 55, and 60 min starting from the left. (B), (D) and (F) show 13 lanes each, which correspond to reaction times 0, 1, 5, 10, 15, 20, 25, 30, 60, 90, 120, 150 and 180 min starting from the left.



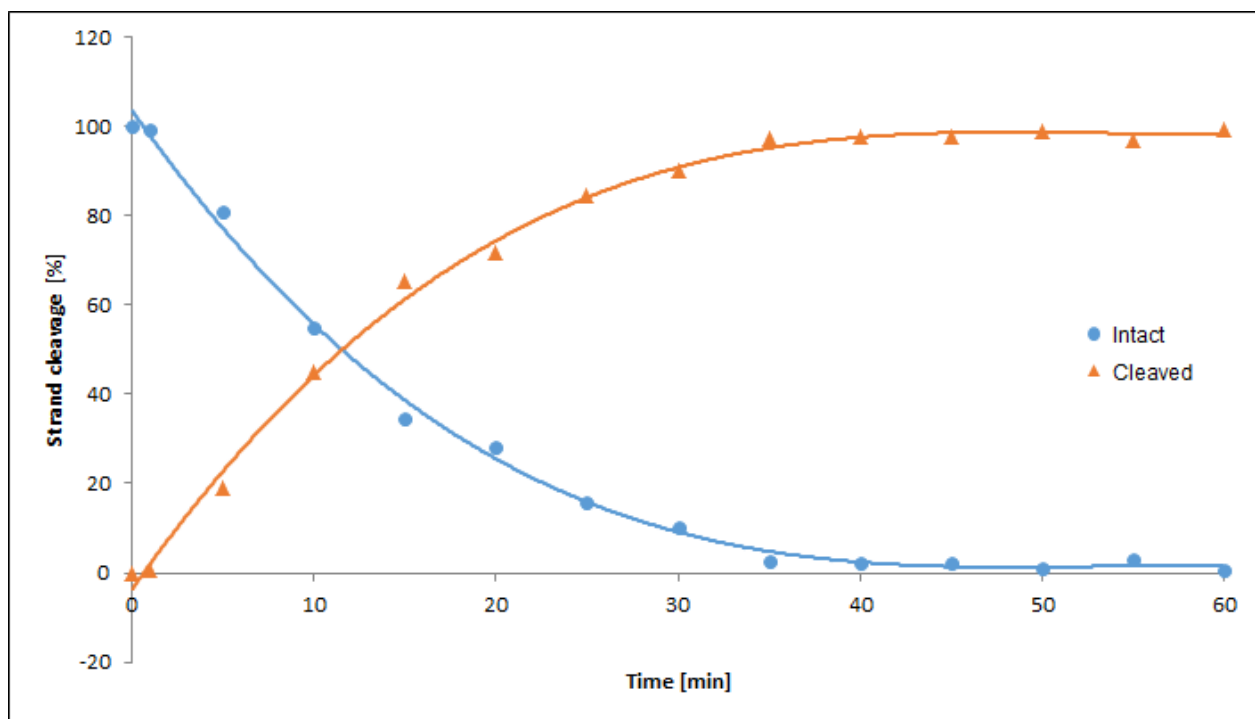

Figure S20. Cleavage assay of dU(-5)RcdA by 0.02U UDG and 0.5U hAPE1. The quantity loss of intact ssDNA (blue) and the quantity increase of SSB-DNA (orange).

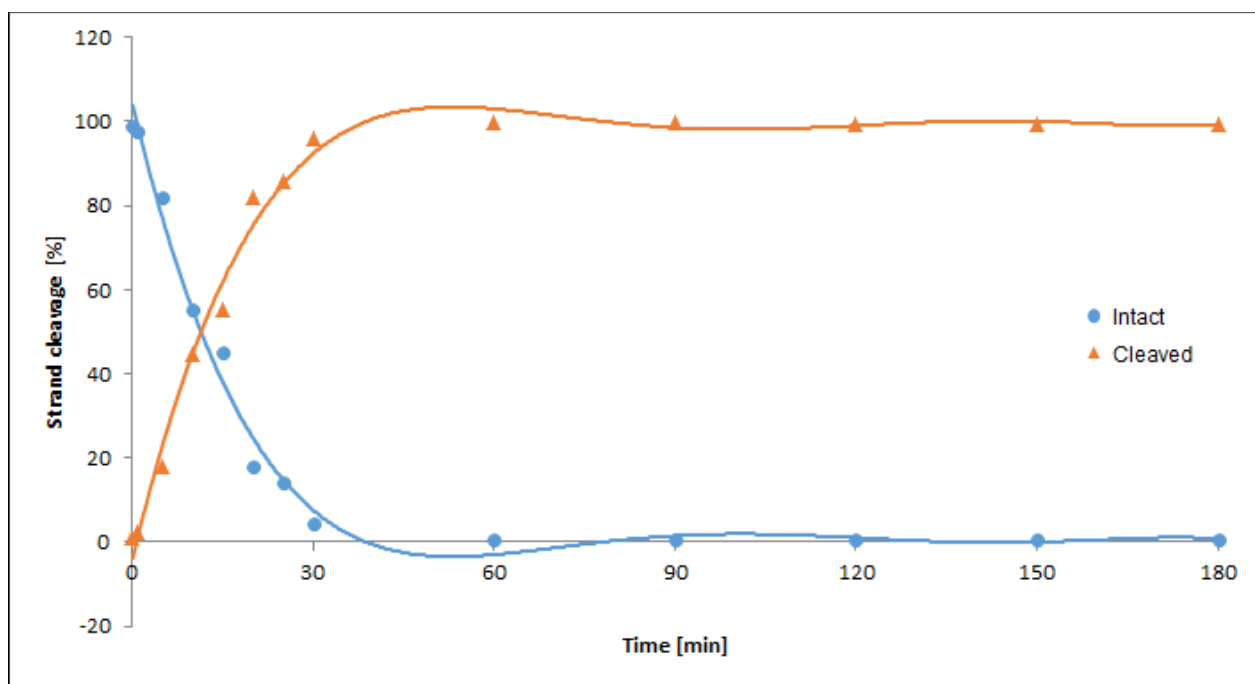

Figure S21. Cleavage assay of dU(-5)RcdA by 0.5U UDG and 0.02U hAPE1. The quantity loss of intact ssDNA (blue) and the quantity increase of SSB-DNA (orange).

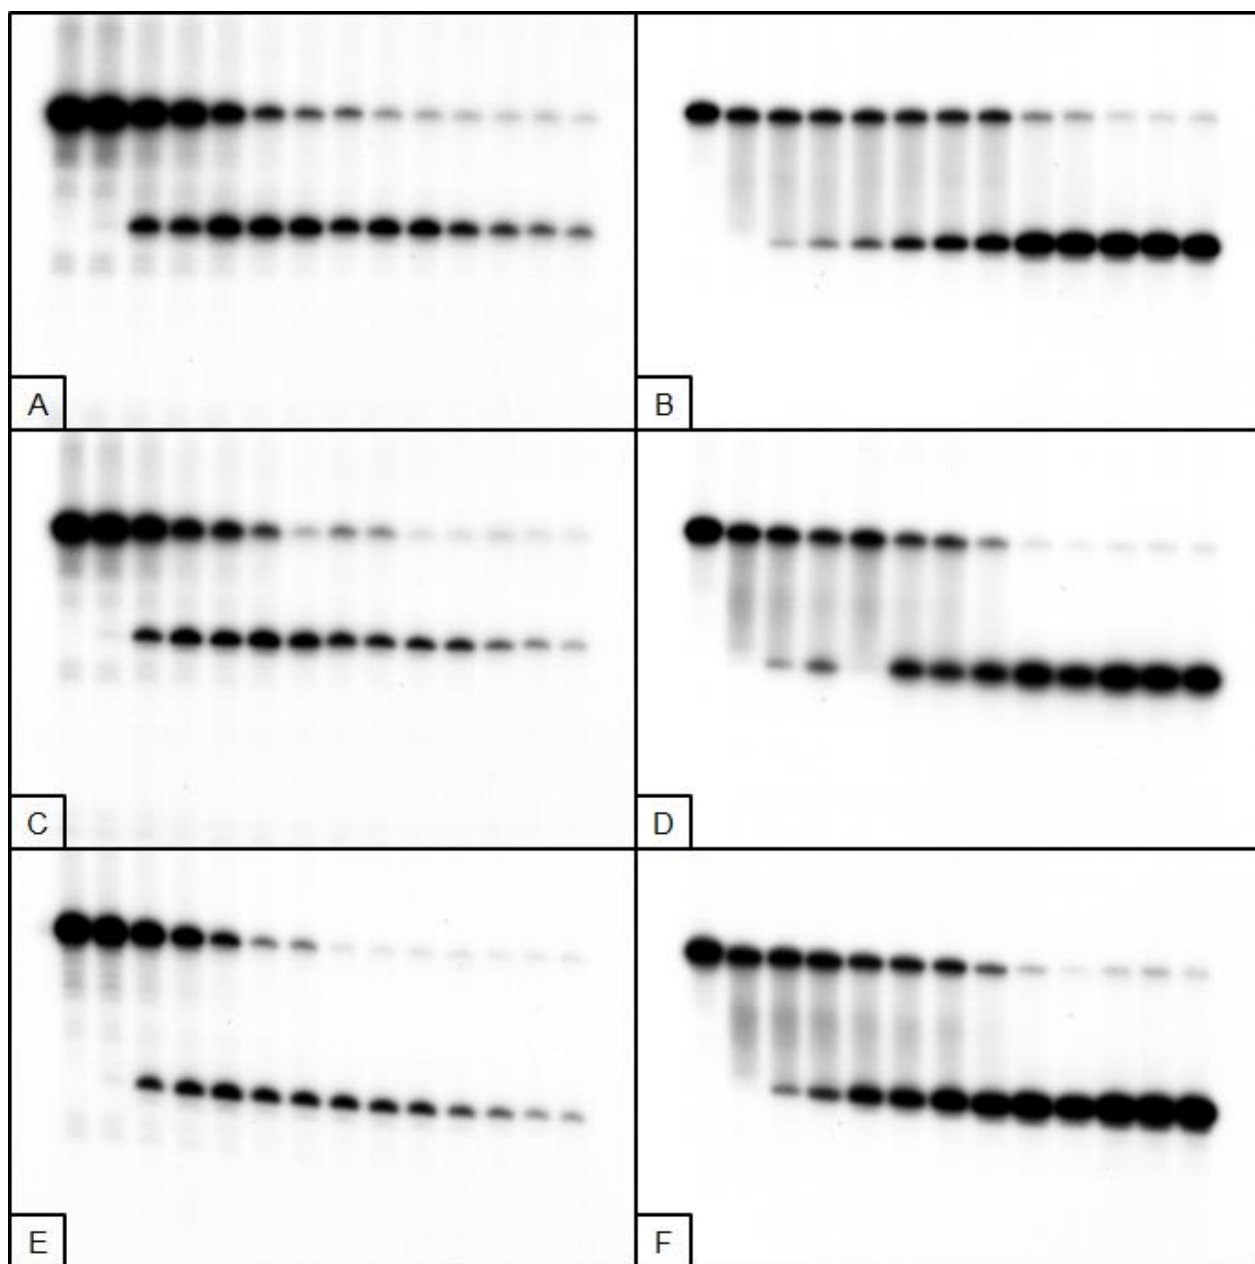

**Figure S22.** Cleavage assay of dU(+5)RcdA by 0.02U UDG and 0.5U hAPE1 (A,C,E) or 0.5U UDG and 0.02U hAPE1 (B,D,F). (A), (C) and (E) show 14 lanes each, which correspond to reaction times 0, 1, 5, 10, 15, 20, 25, 30, 35, 40, 45, 50, 55, and 60 min starting from the left. (B), (D) and (F) show 13 lanes each, which correspond to reaction times 0, 1, 5, 10, 15, 20, 25, 30, 60, 90, 120, 150 and 180 min starting from the left.

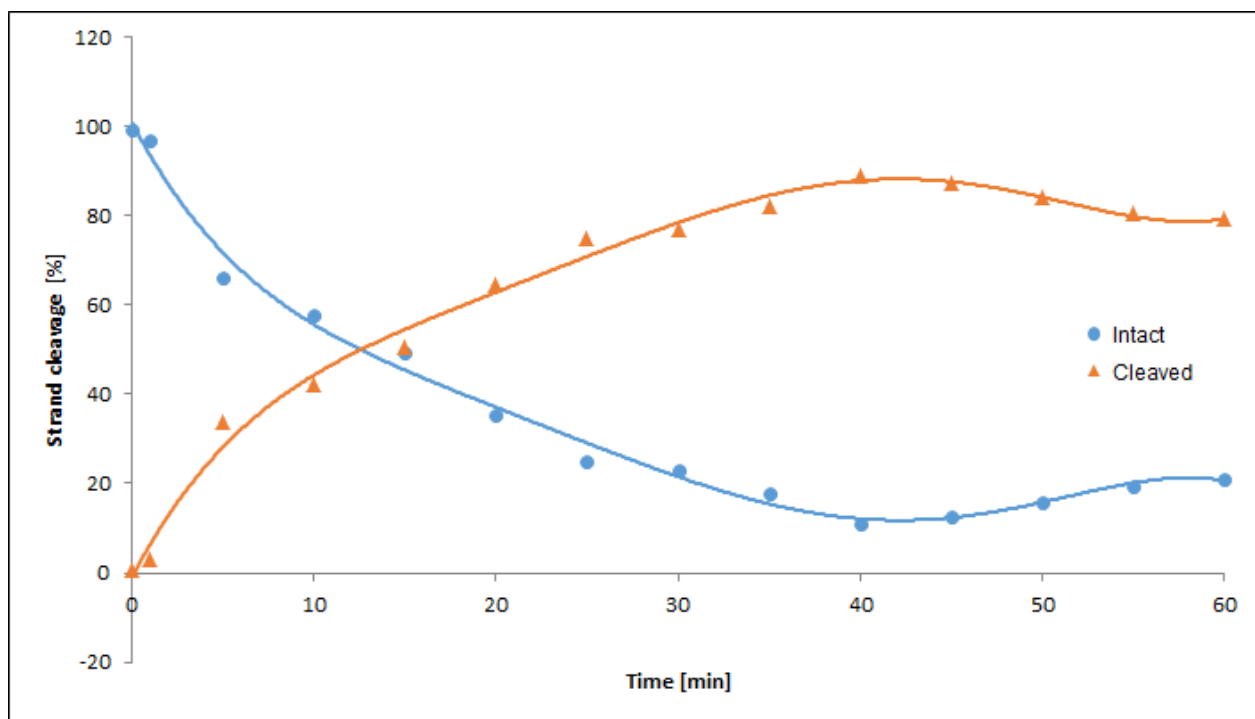

Figure S23. Cleavage assay of dU(+5)RcdA by 0.02U UDG and 0.5U hAPE1. The quantity loss of intact ssDNA (blue) and the quantity increase of SSB-DNA (orange).

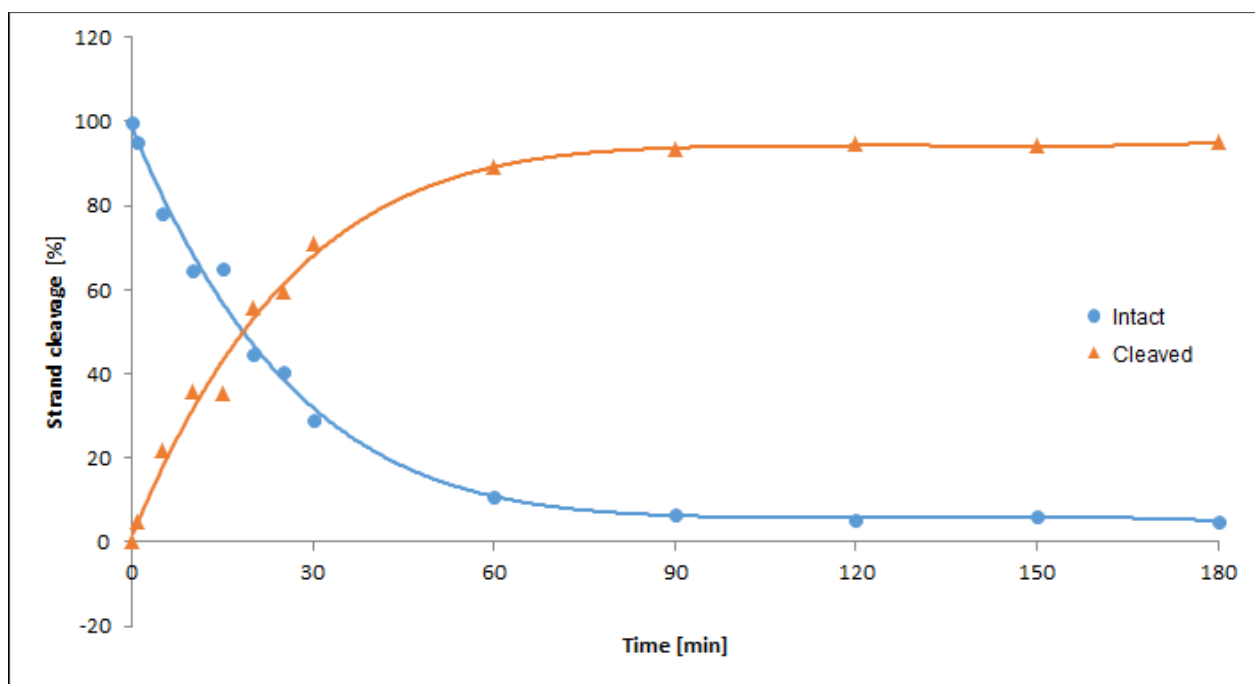

Figure S24. Cleavage assay of dU(+5)RcdA by 0.5U UDG and 0.02U hAPE1. The quantity loss of intact ssDNA (blue) and the quantity increase of SSB-DNA (orange).

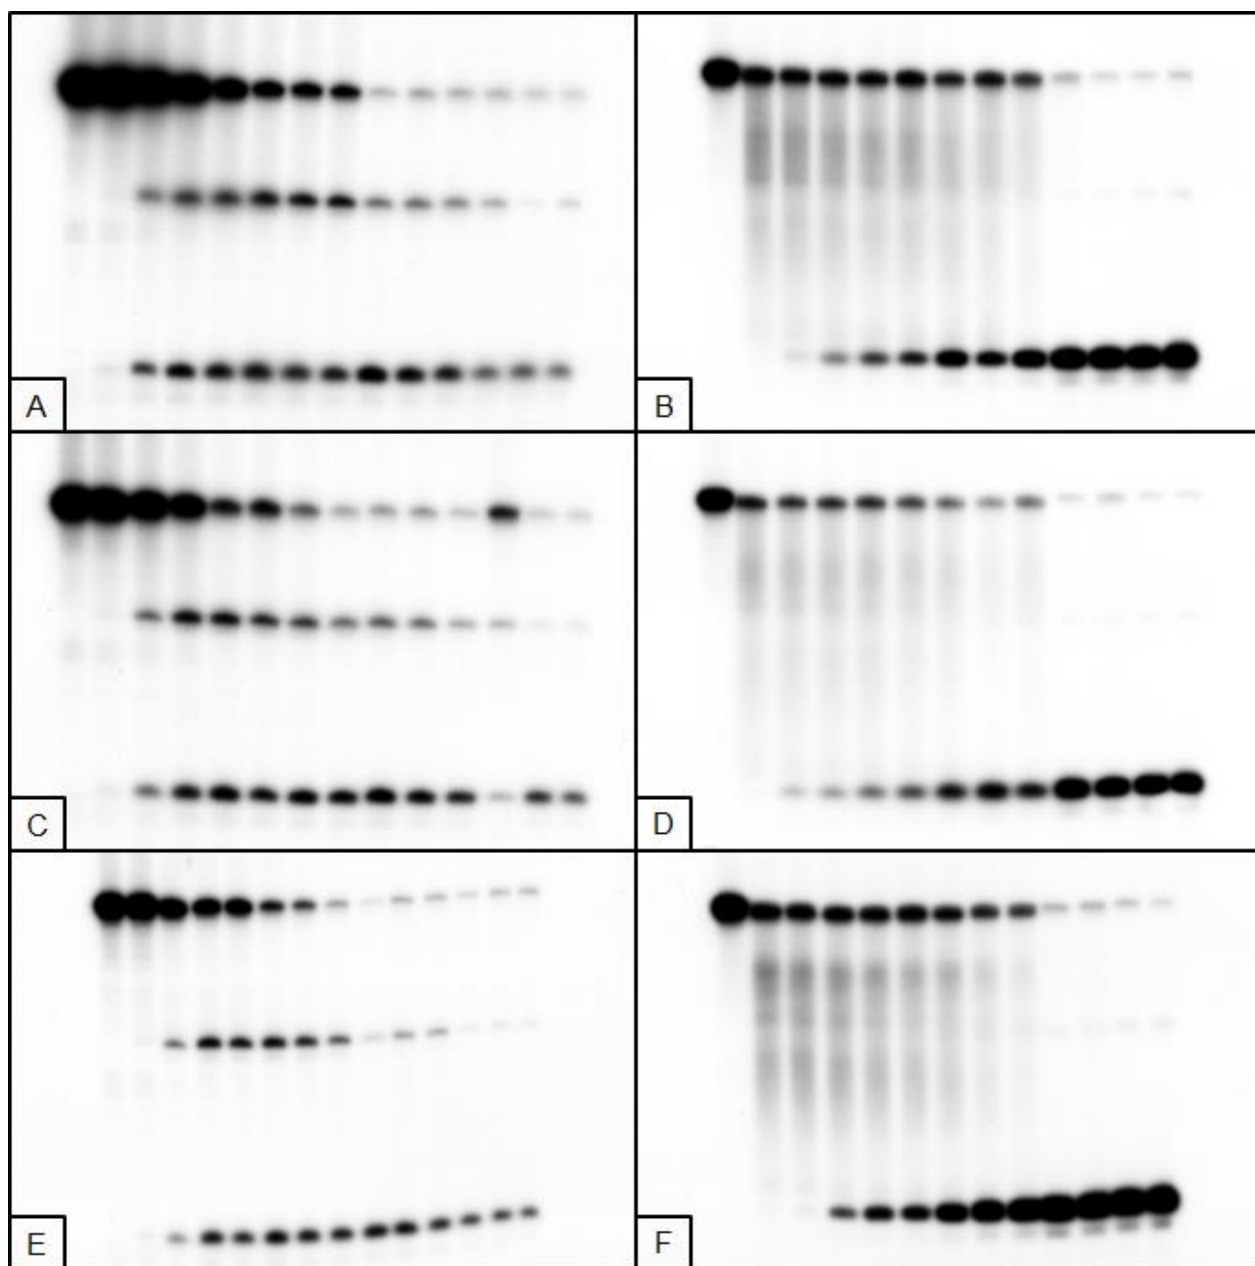

Figure S25. Cleavage assay of dU(-5)(+5)RcdA by 0.02U UDG and 0.5U hAPE1 (A,C,E) or 0.5U UDG and 0.02U hAPE1 (B,D,F). (A), (C) and (E) show 14 lanes each, which correspond to reaction times 0, 1, 5, 10, 15, 20, 25, 30, 35, 40, 45, 50, 55, and 60 min starting from the left. (B), (D) and (F) show 13 lanes each, which correspond to reaction times 0, 1, 5, 10, 15, 20, 25, 30, 60, 90, 120, 150 and 180 min starting from the left.

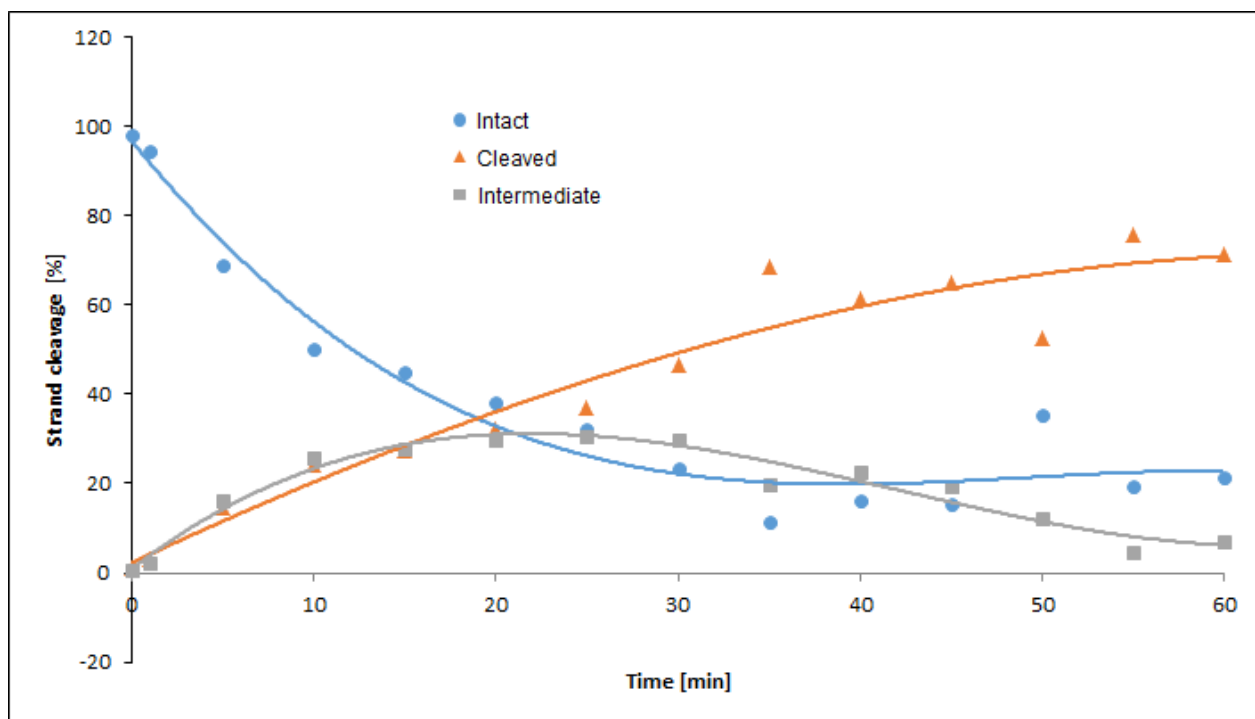

Figure S26. Cleavage assay of dU(-5)(+5)RcdA by 0.02U UDG and 0.5U hAPE1. The quantity loss of intact ssDNA (blue), the quantity increase of SSB-DNA (orange) and an intermediate oligo fragment (grey).

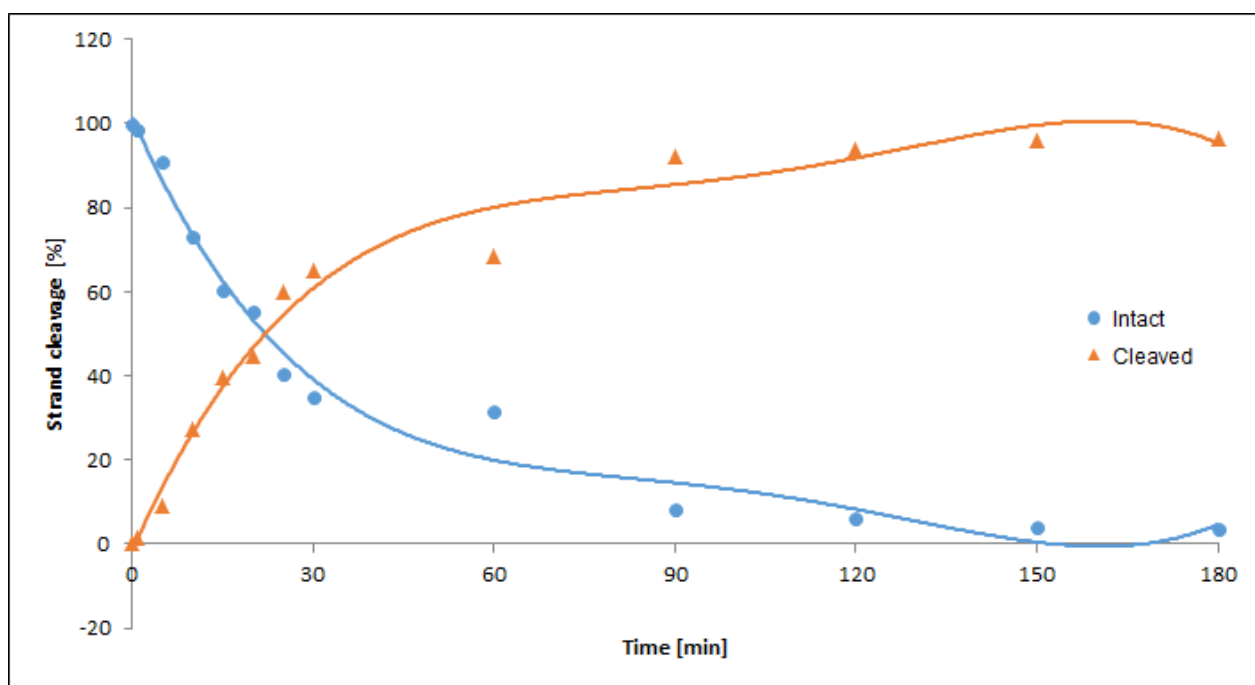

Figure S27. Cleavage assay of dU(-5)(+5)RcdA by 0.5U UDG and 0.02U hAPE1. The quantity loss of intact ssDNA (blue) and the quantity increase of SSB-DNA (orange).

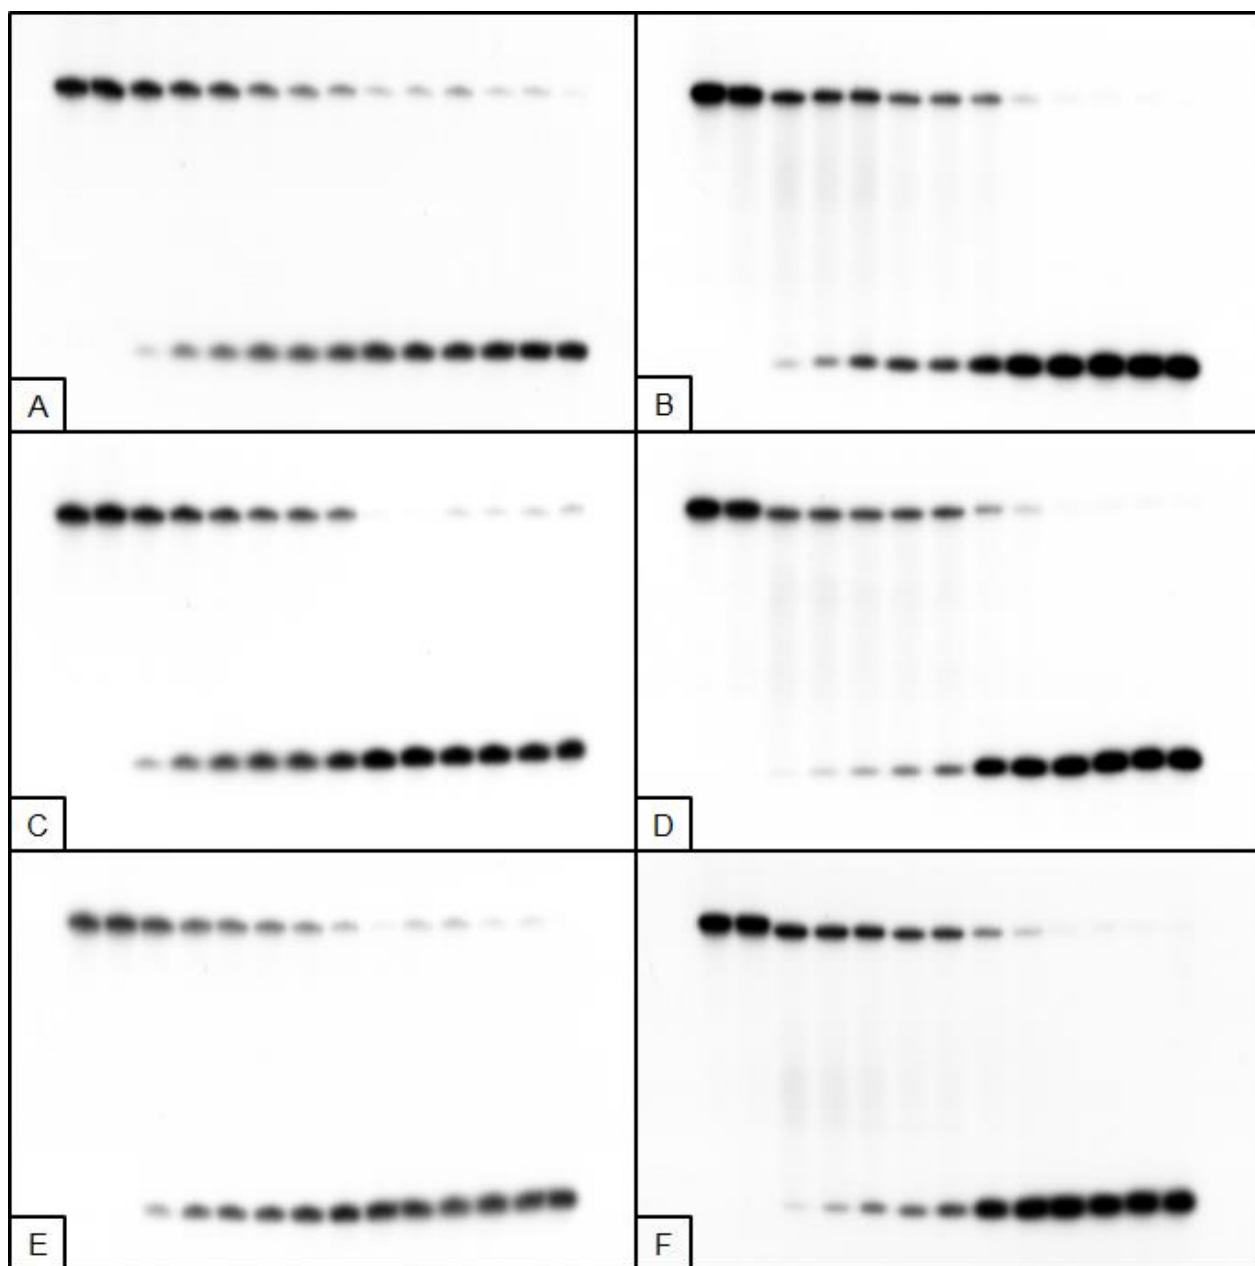

Figure S28. Cleavage assay of dU(-5)ScdG by 0.02U UDG and 0.5U hAPE1 (A,C,E) or 0.5U UDG and 0.02U hAPE1 (B,D,F). (A), (C) and (E) show 14 lanes each, which correspond to reaction times 0, 1, 5, 10, 15, 20, 25, 30, 35, 40, 45, 50, 55, and 60 min starting from the left. (B), (D) and (F) show 13 lanes each, which correspond to reaction times 0, 1, 5, 10, 15, 20, 25, 30, 60, 90, 120, 150 and 180 min starting from the left.

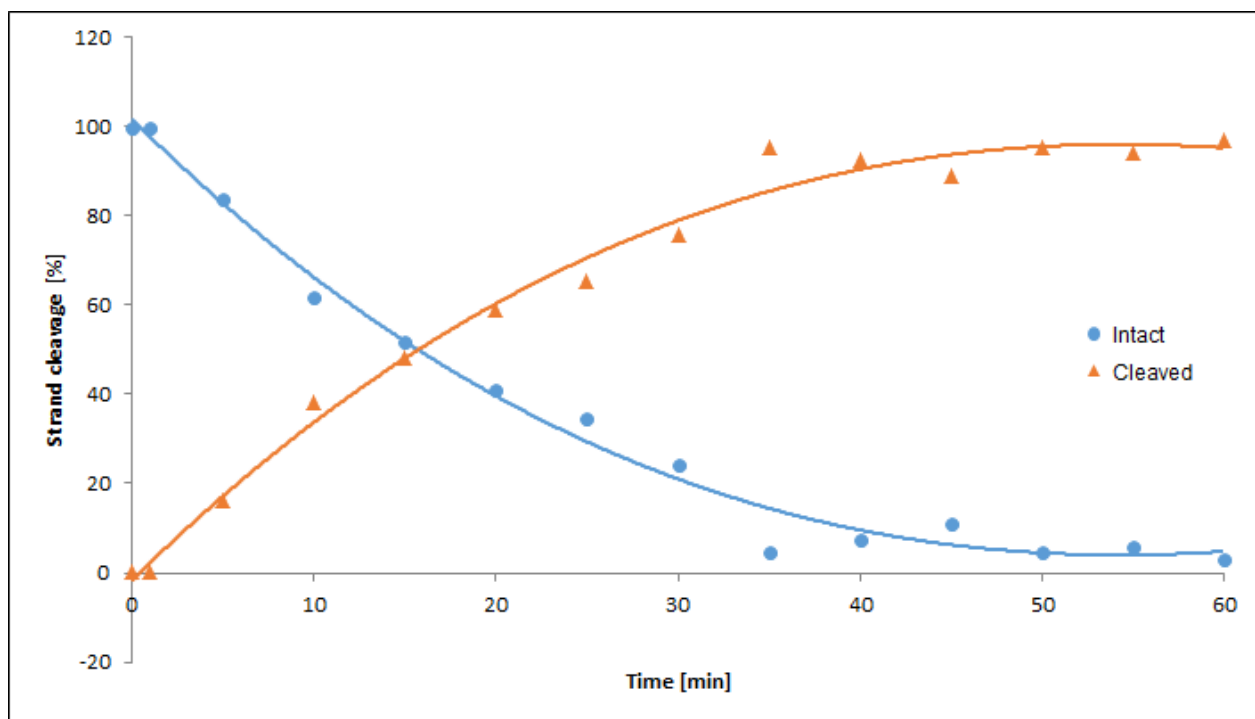

Figure S29. Cleavage assay of dU(-5)ScdG by 0.02U UDG and 0.5U hAPE1. The quantity loss of intact ssDNA (blue) and the quantity increase of SSB-DNA (orange).

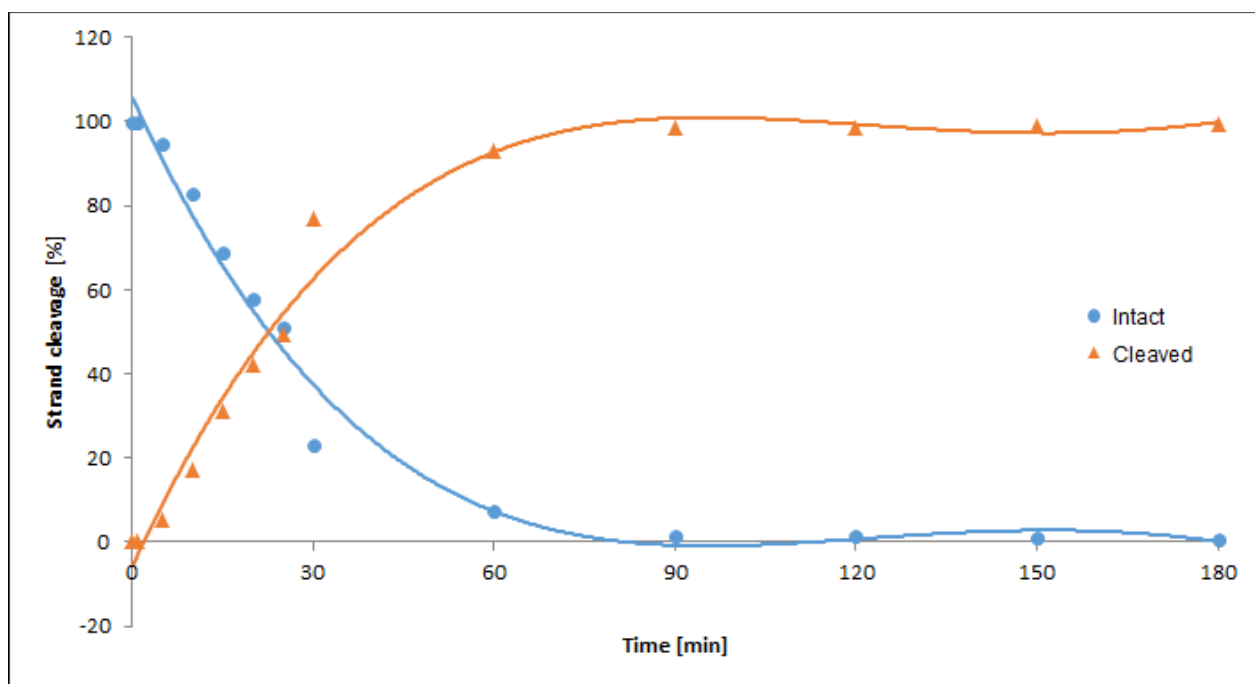

Figure S30. Cleavage assay of dU(-5)ScdG by 0.5U UDG and 0.02U hAPE1. The quantity loss of intact ssDNA (blue) and the quantity increase of SSB-DNA (orange).

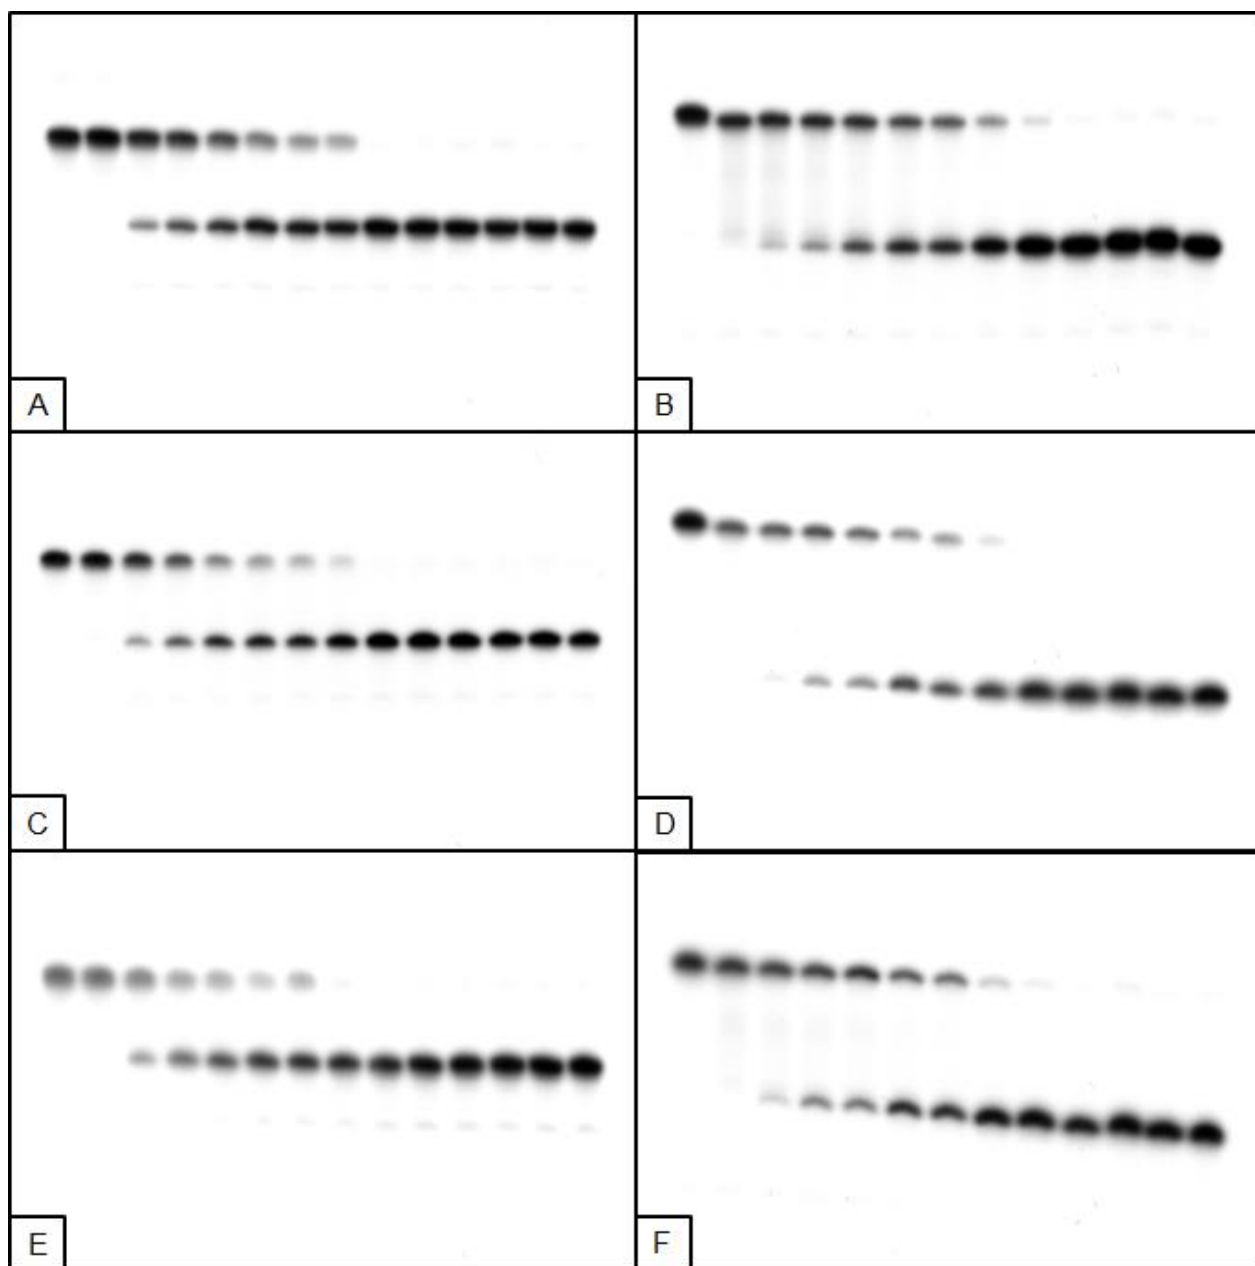

Figure S31. Cleavage assay of dU(+5)ScdG by 0.02U UDG and 0.5U hAPE1 (A,C,E) or 0.5U UDG and 0.02U hAPE1 (B,D,F). (A), (C) and (E) show 14 lanes each, which correspond to reaction times 0, 1, 5, 10, 15, 20, 25, 30, 35, 40, 45, 50, 55, and 60 min starting from the left. (B), (D) and (F) show 13 lanes each, which correspond to reaction times 0, 1, 5, 10, 15, 20, 25, 30, 60, 90, 120, 150 and 180 min starting from the left.



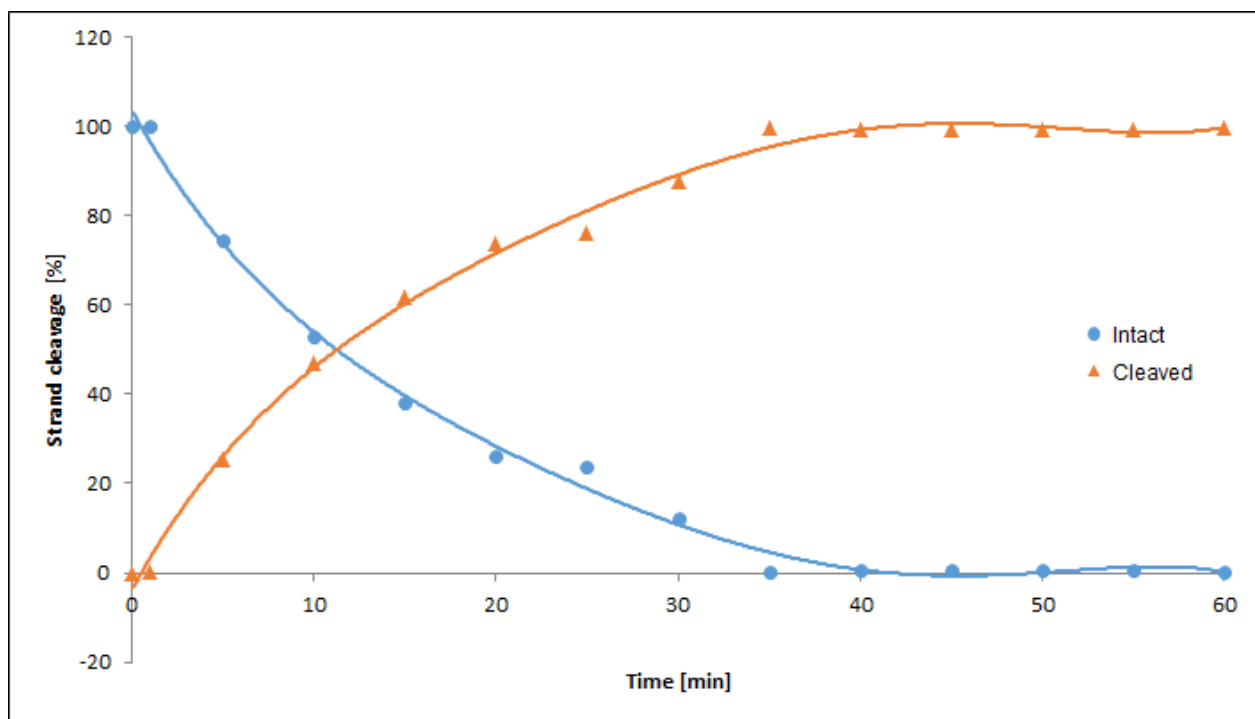

Figure S32. Cleavage assay of dU(+5)ScdG by 0.02U UDG and 0.5U hAPE1. The quantity loss of intact ssDNA (blue) and the quantity increase of SSB-DNA (orange).

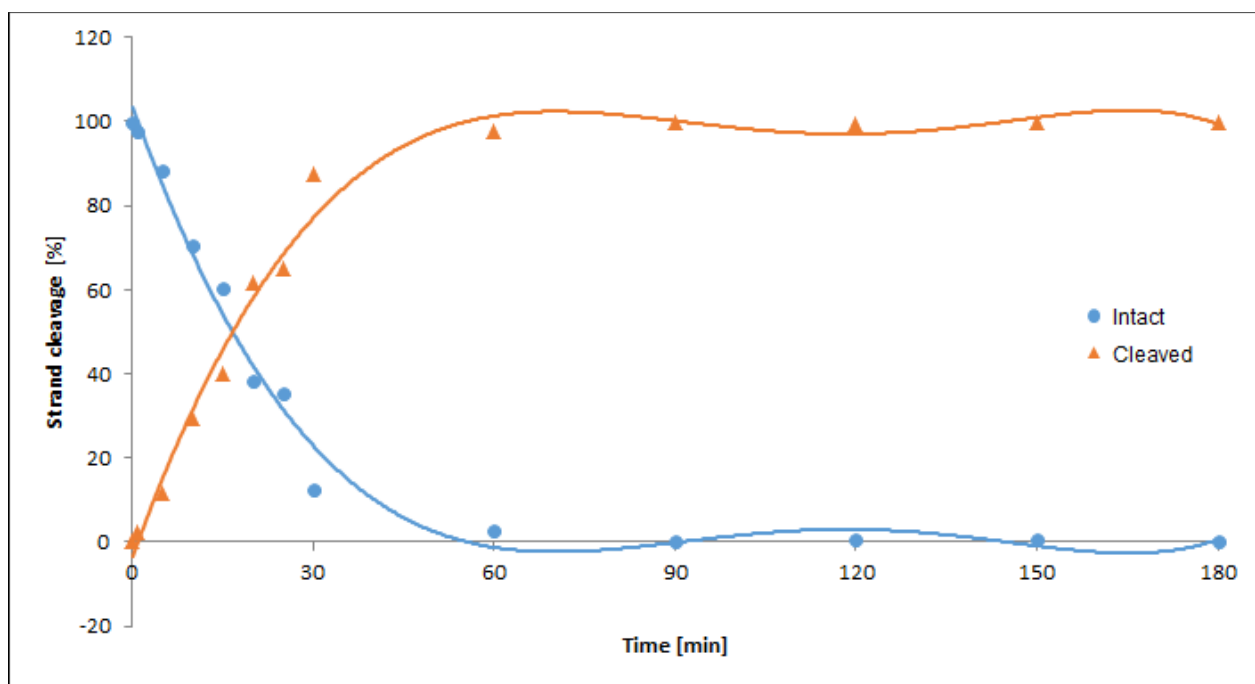

Figure S33. Cleavage assay of dU(+5)ScdG by 0.5U UDG and 0.02U hAPE1. The quantity loss of intact ssDNA (blue) and the quantity increase of SSB-DNA (orange).

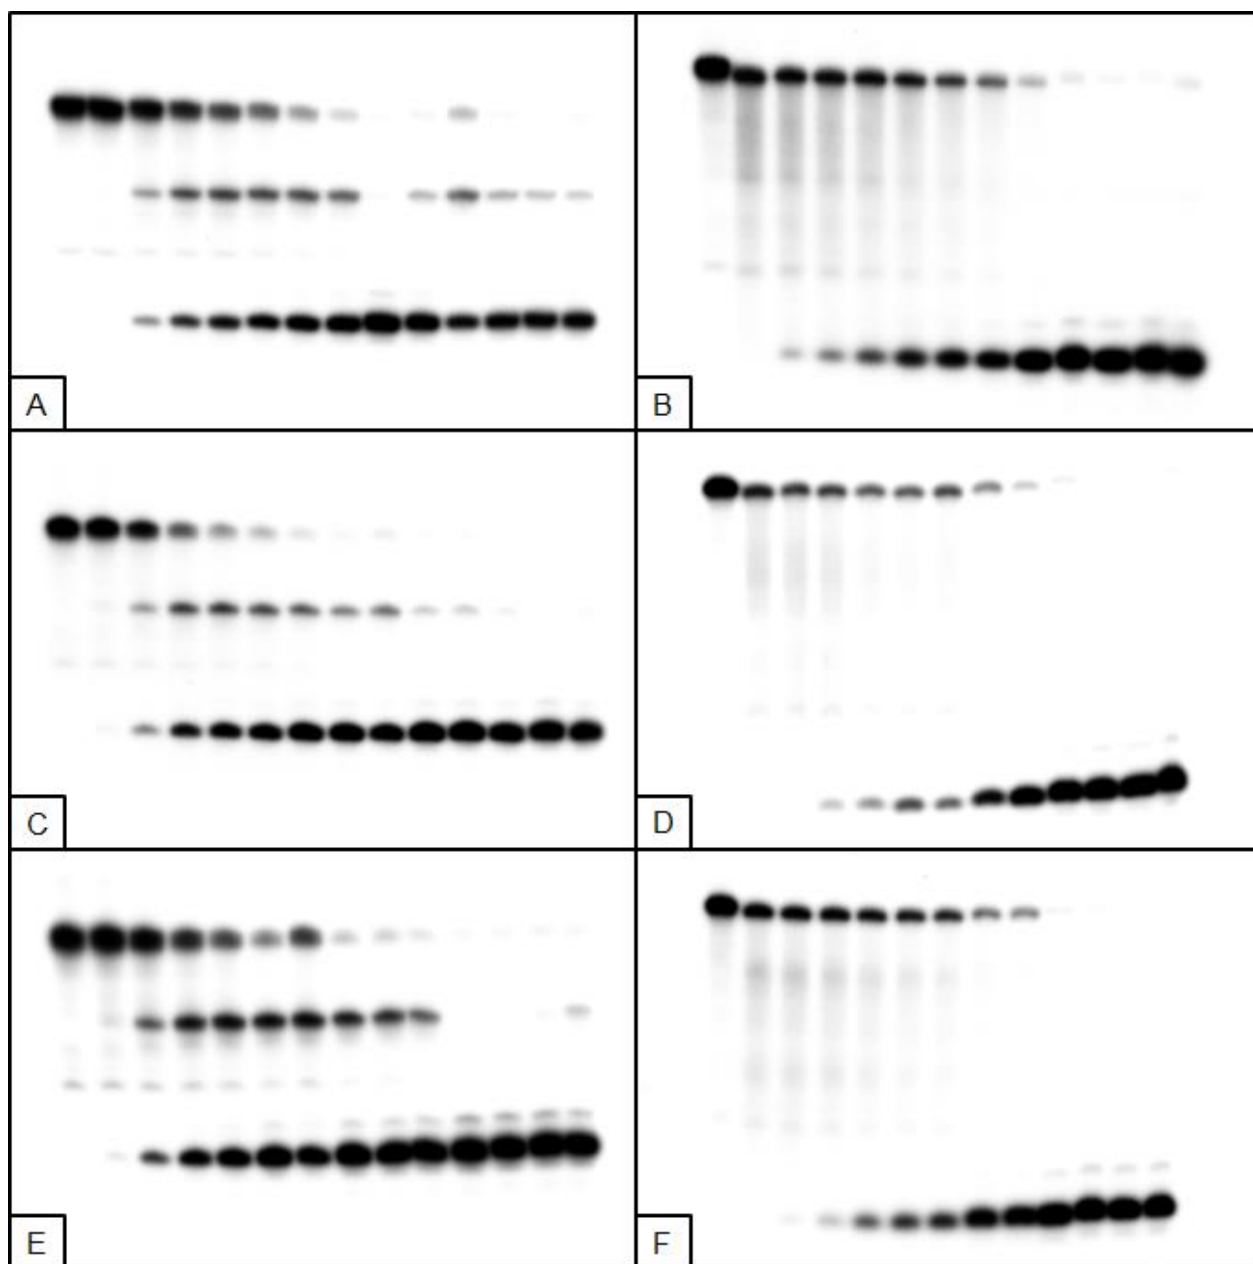

Figure S34. Cleavage assay of dU(-5)(+5)ScdG by 0.02U UDG and 0.5U hAPE1 (A,C,E) or 0.5U UDG and 0.02U hAPE1 (B,D,F). (A), (C) and (E) show 14 lanes each, which correspond to reaction times 0, 1, 5, 10, 15, 20, 25, 30, 35, 40, 45, 50, 55, and 60 min starting from the left. (B), (D) and (F) show 13 lanes each, which correspond to reaction times 0, 1, 5, 10, 15, 20, 25, 30, 60, 90, 120, 150 and 180 min starting from the left.

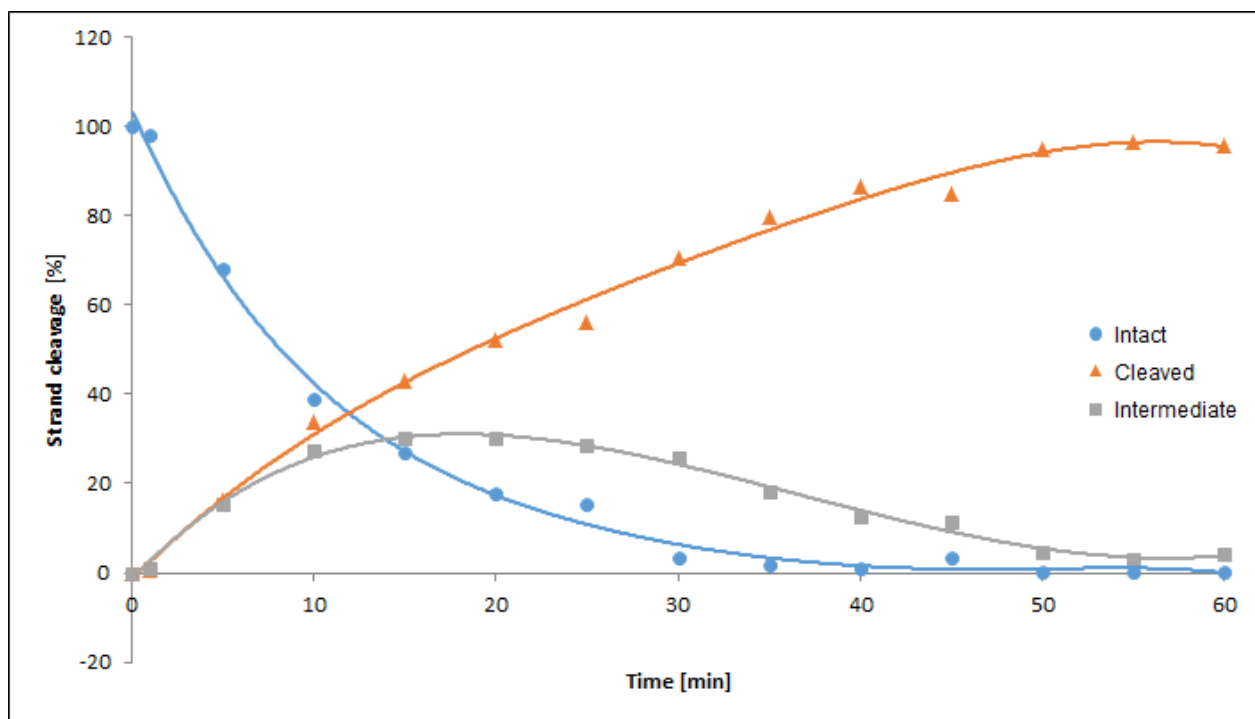

Figure S35. Cleavage assay of dU(-5)(+5)ScdG by 0.02U UDG and 0.5U hAPE1. The quantity loss of intact ssDNA (blue), the quantity increase of SSB-DNA (orange) and an intermediate oligo fragment (grey).

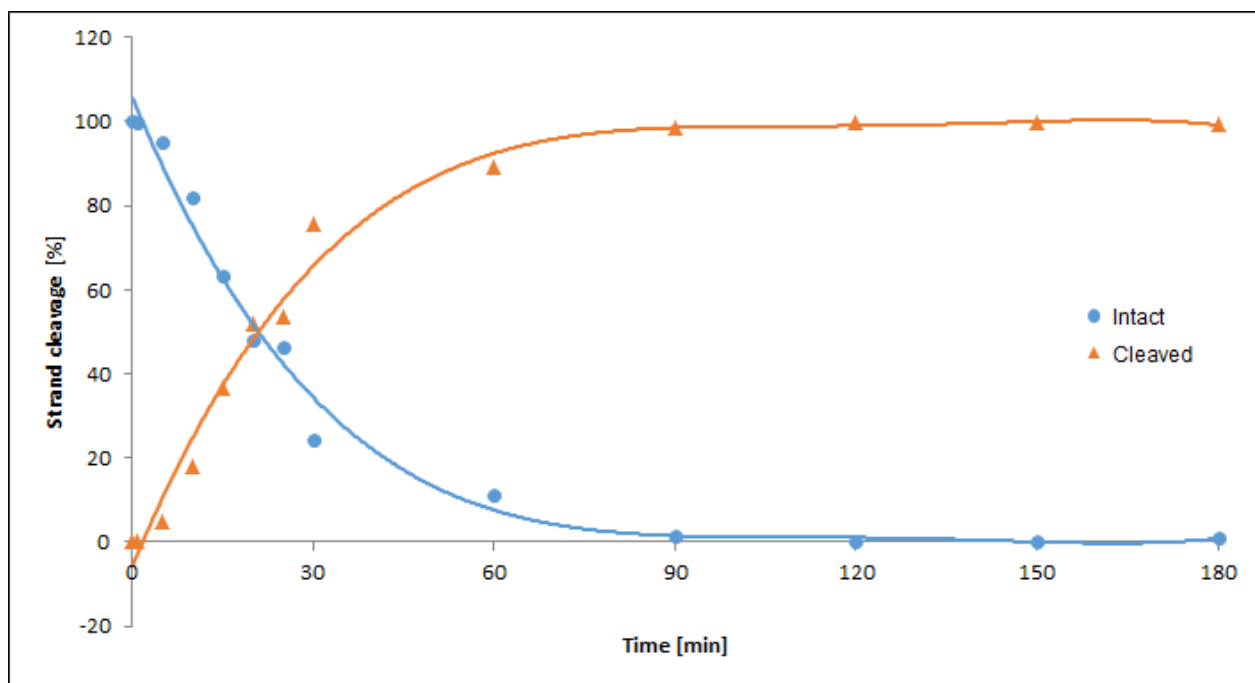

Figure S36. Cleavage assay of dU(-5)(+5)ScdG by 0.5U UDG and 0.02U hAPE1. The quantity loss of intact ssDNA (blue) and the quantity increase of SSB-DNA (orange).

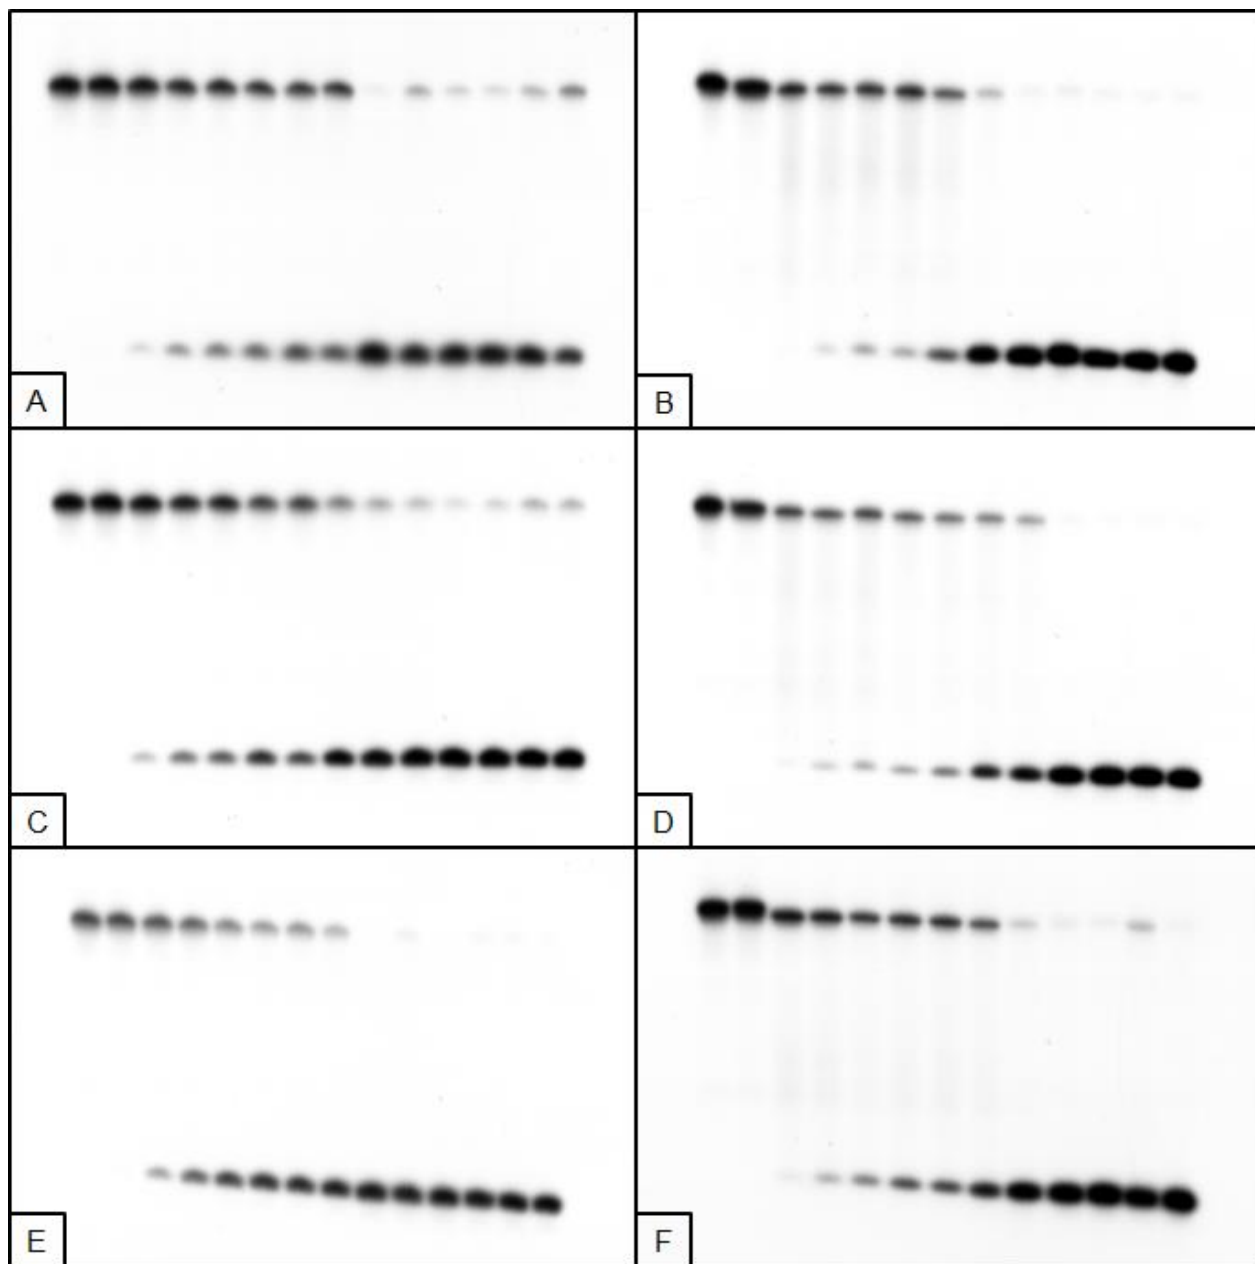

Figure S37. Cleavage assay of dU(-5)RcdG by 0.02U UDG and 0.5U hAPE1 (A,C,E) or 0.5U UDG and 0.02U hAPE1 (B,D,F). (A), (C) and (E) show 14 lanes each, which correspond to reaction times 0, 1, 5, 10, 15, 20, 25, 30, 35, 40, 45, 50, 55, and 60 min starting from the left. (B), (D) and (F) show 13 lanes each, which correspond to reaction times 0, 1, 5, 10, 15, 20, 25, 30, 60, 90, 120, 150 and 180 min starting from the left.

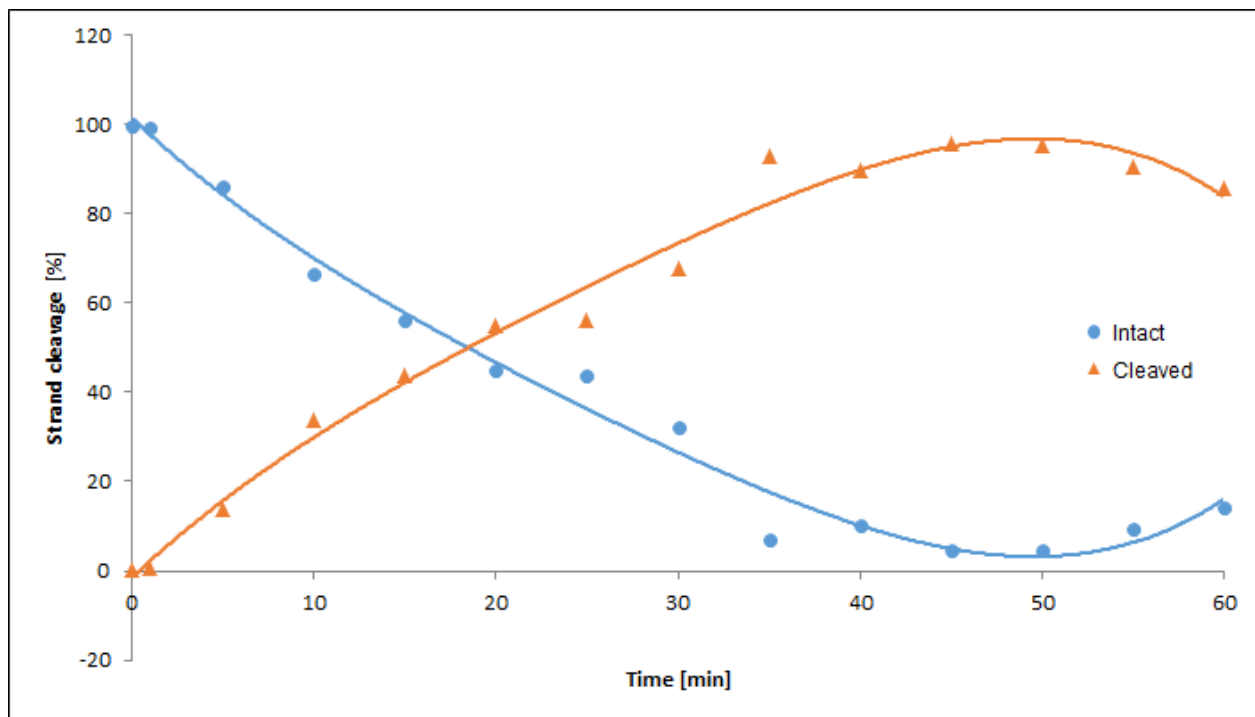

Figure S38. Cleavage assay of dU(-5)RcdG by 0.02U UDG and 0.5U hAPE1. The quantity loss of intact ssDNA (blue) and the quantity increase of SSB-DNA (orange).

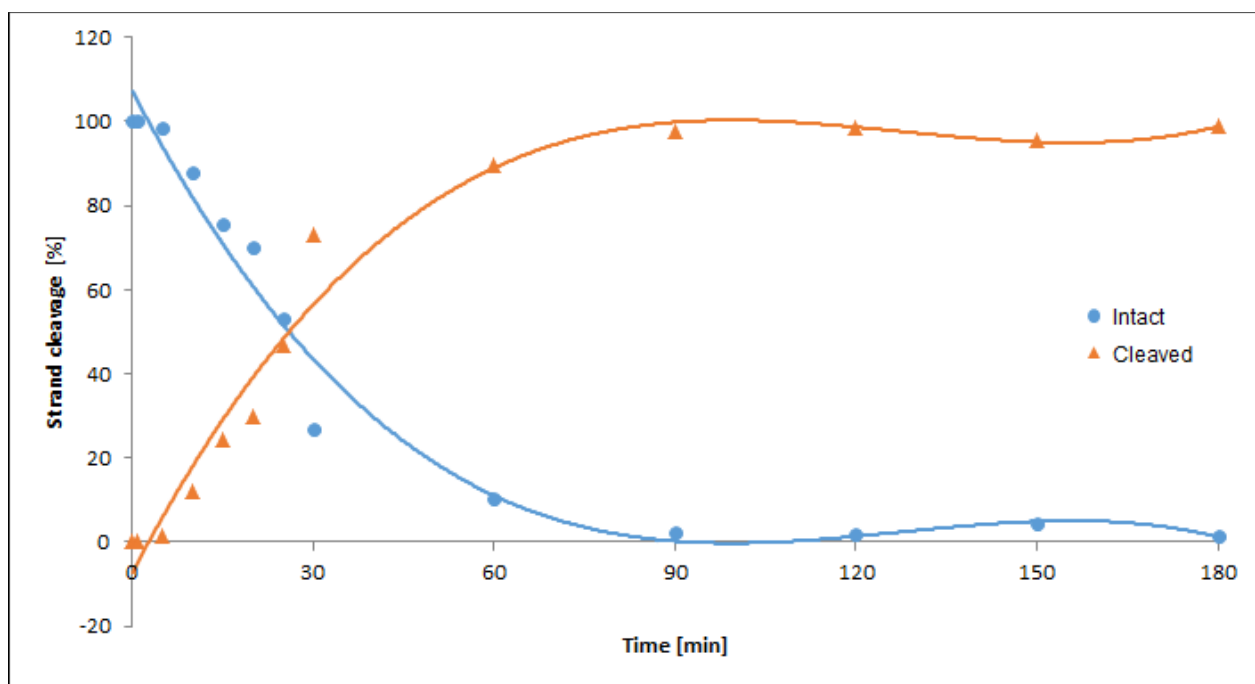

Figure S39. Cleavage assay of dU(-5)RcdG by 0.5U UDG and 0.02U hAPE1. The quantity loss of intact ssDNA (blue) and the quantity increase of SSB-DNA (orange).

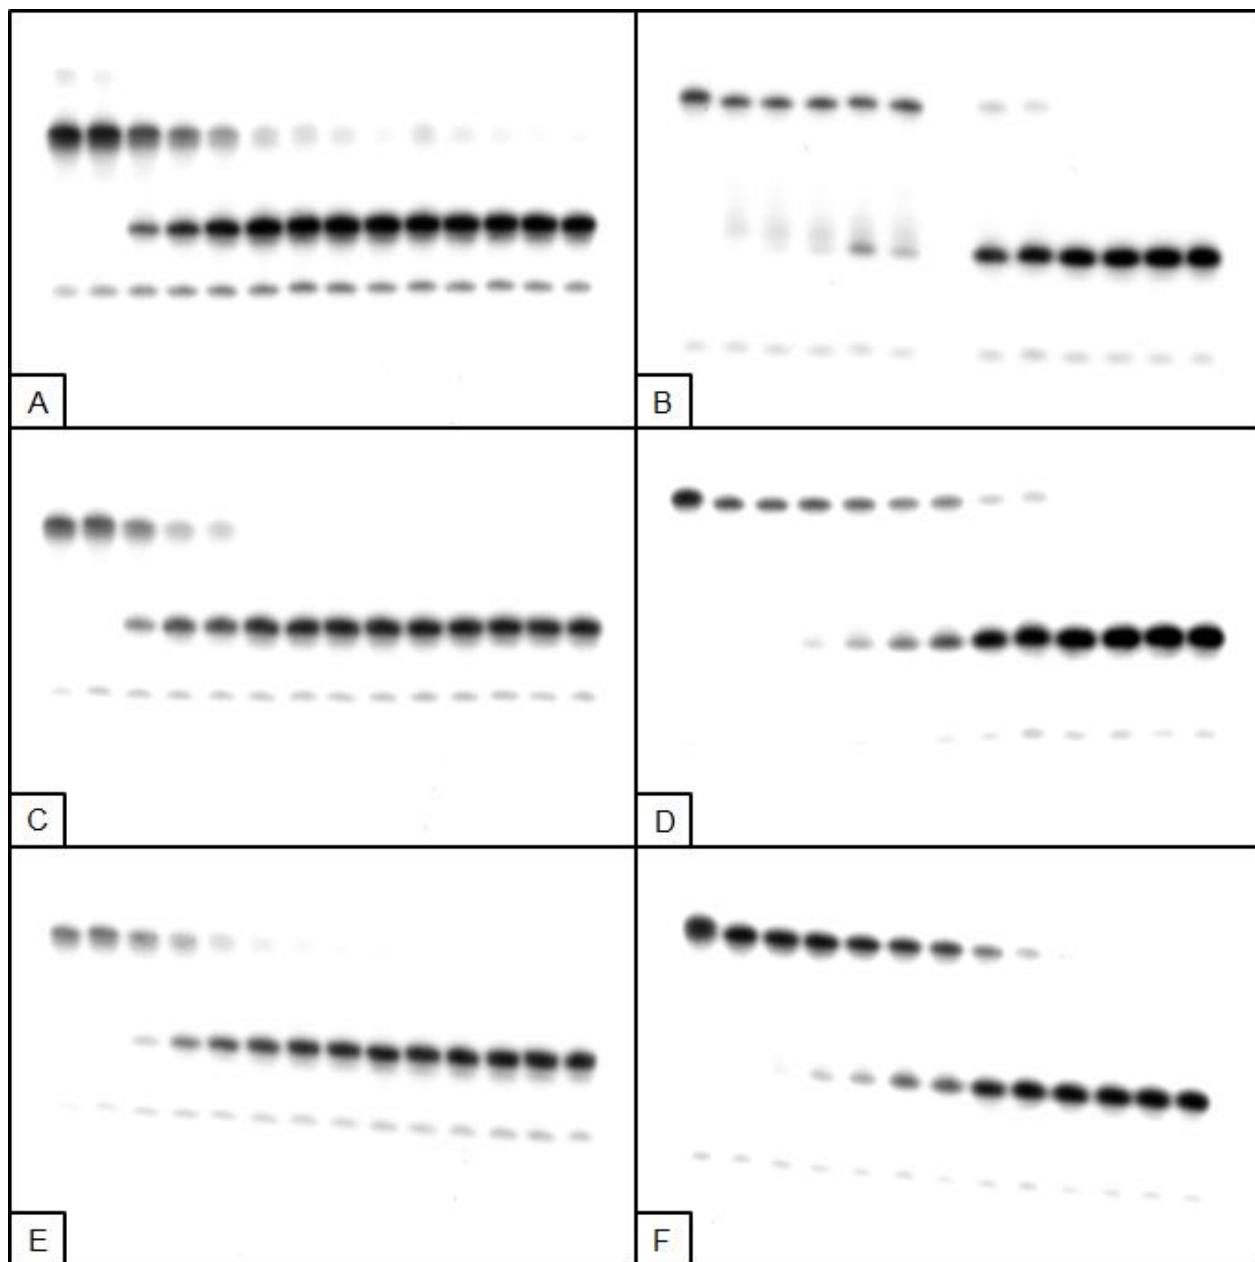

**Figure S40.** Cleavage assay of dU(+5)RcdG by 0.02U UDG and 0.5U hAPE1 (A,C,E) or 0.5U UDG and 0.02U hAPE1 (B,D,F). (A), (C) and (E) show 14 lanes each, which correspond to reaction times 0, 1, 5, 10, 15, 20, 25, 30, 35, 40, 45, 50, 55, and 60 min starting from the left. (B), (D) and (F) show 13 lanes each, which correspond to reaction times 0, 1, 5, 10, 15, 20, 25, 30, 60, 90, 120, 150 and 180 min starting from the left.

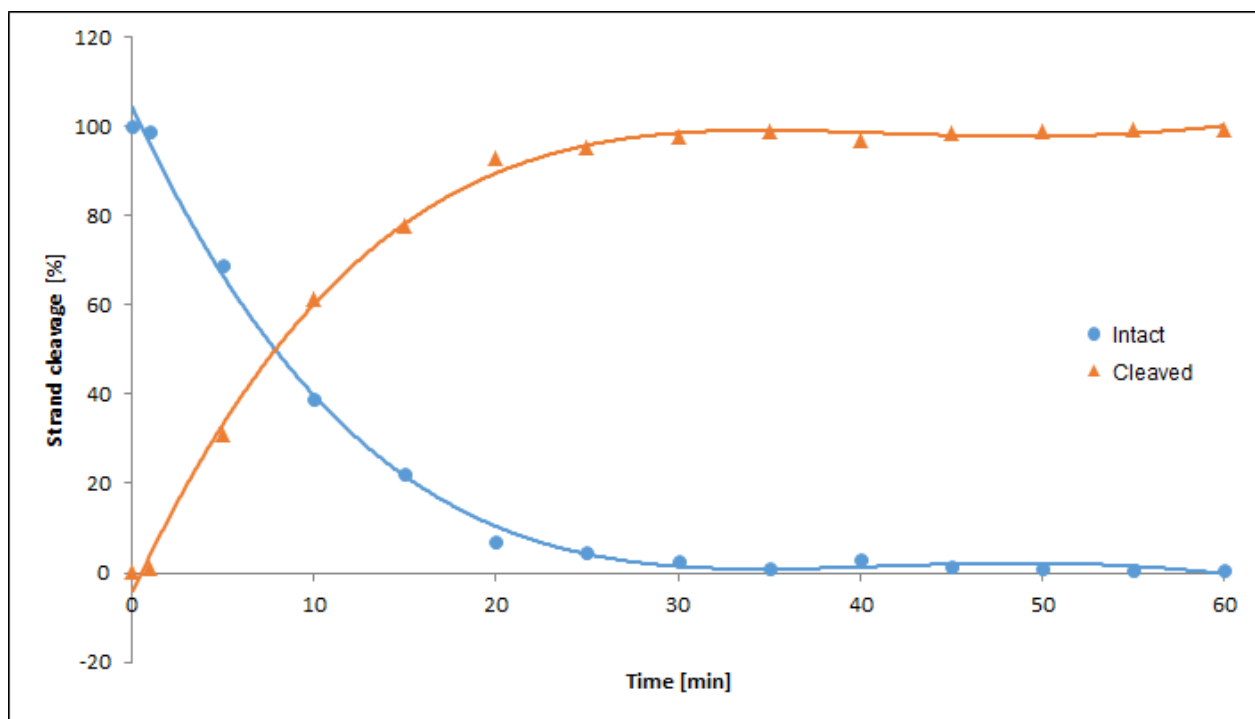

Figure S41. Cleavage assay of dU(+5)RcdG by 0.02U UDG and 0.5U hAPE1. The quantity loss of intact ssDNA (blue) and the quantity increase of SSB-DNA (orange).

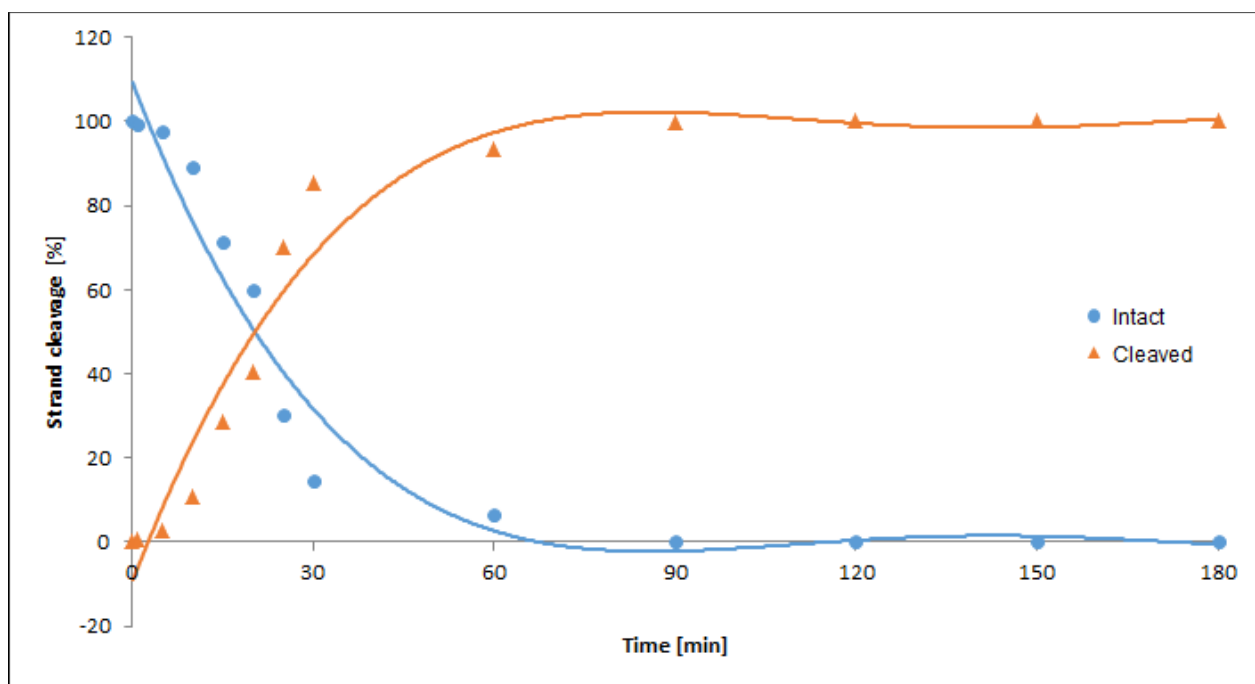

Figure S42. Cleavage assay of dU(+5)RcdG by 0.5U UDG and 0.02U hAPE1. The quantity loss of intact ssDNA (blue) and the quantity increase of SSB-DNA (orange).

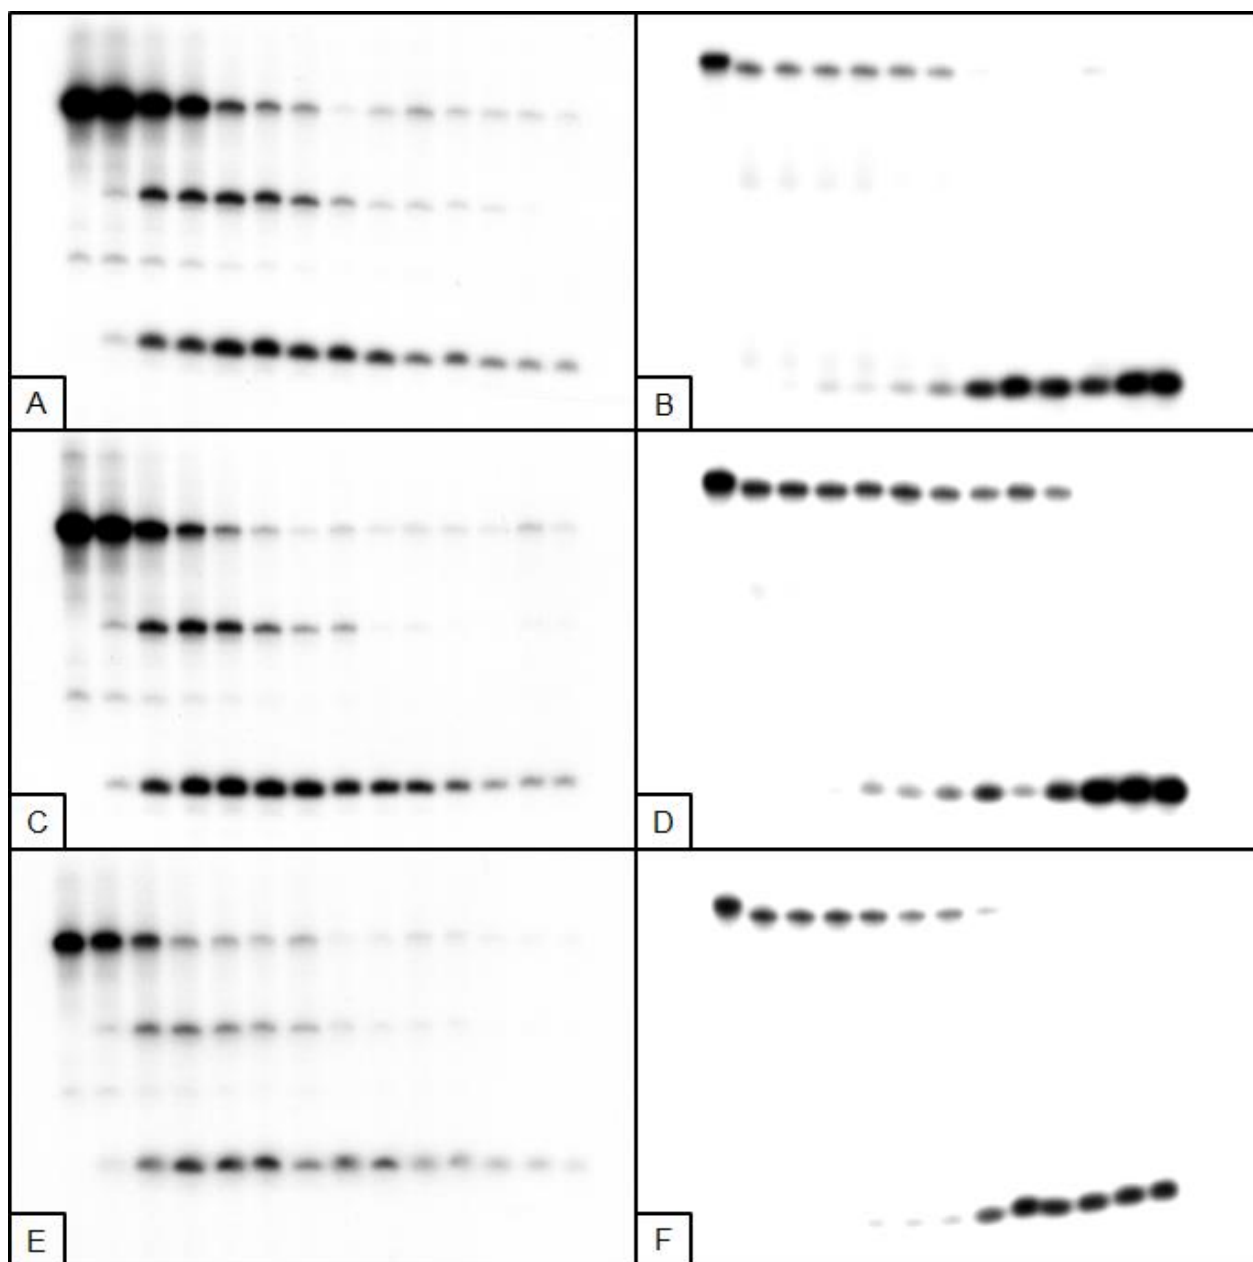

Figure S43. Cleavage assay of dU(-5)(+5)RcdG by 0.02U UDG and 0.5U hAPE1 (A,C,E) or 0.5U UDG and 0.02U hAPE1 (B,D,F) . (A), (C) and (E) show 14 lanes each, which correspond to reaction times 0, 1, 5, 10, 15, 20, 25, 30, 35, 40, 45, 50, 55, and 60 min starting from the left. (B), (D) and (F) show 13 lanes each, which correspond to reaction times 0, 1, 5, 10, 15, 20, 25, 30, 60, 90, 120, 150 and 180 min starting from the left.



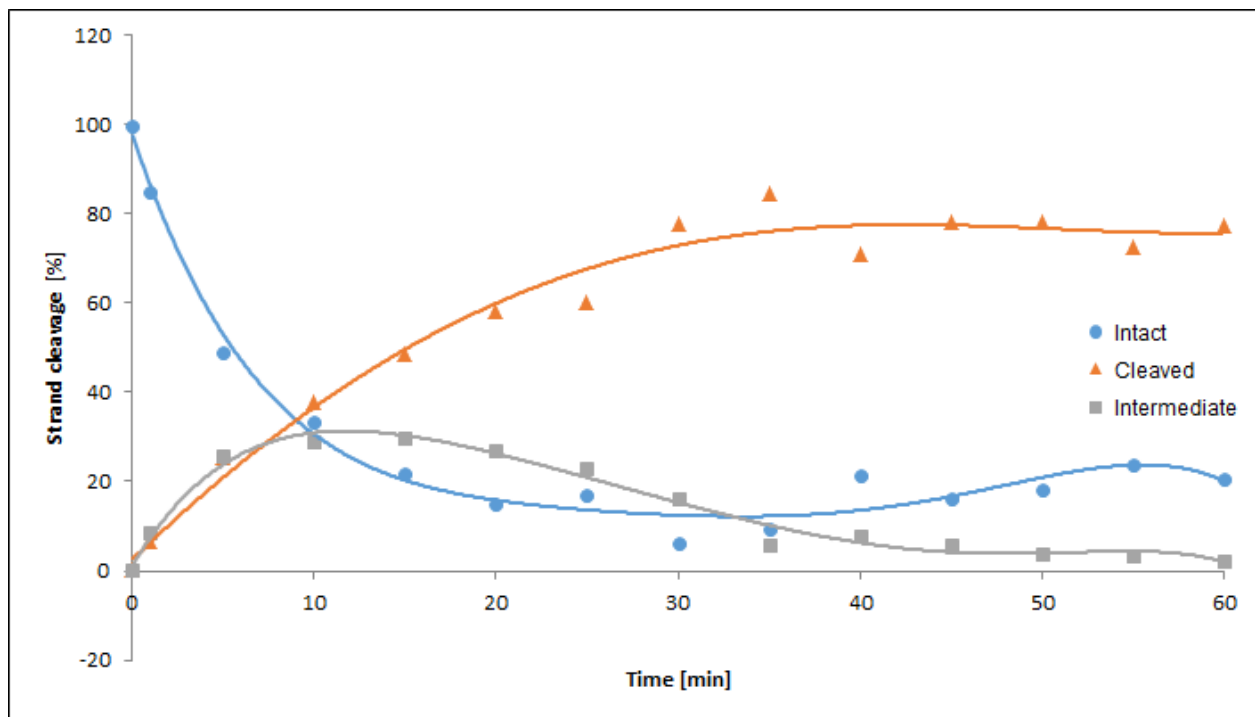

Figure S44. Cleavage assay of dU(-5)(+5)RcdG by 0.02U UDG and 0.5U hAPE1. The quantity loss of intact ssDNA (blue), the quantity increase of SSB-DNA (orange) and an intermediate oligo fragment (grey).

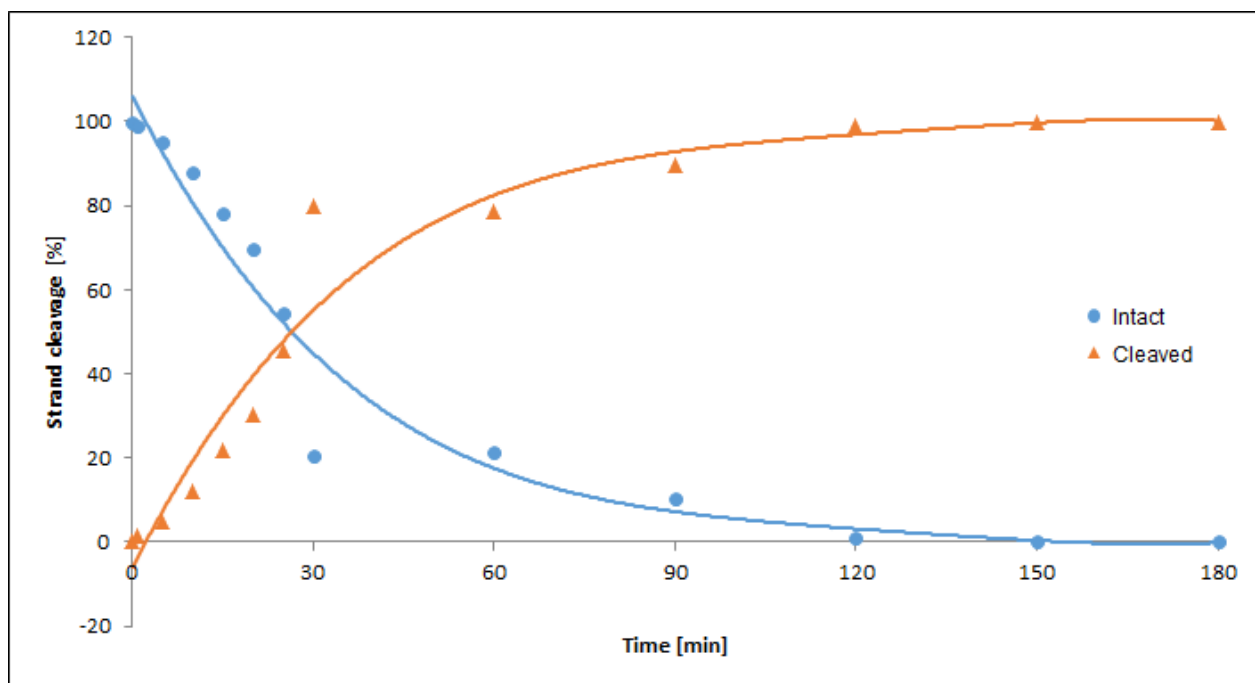

Figure S45. Cleavage assay of dU(-5)(+5)RcdG by 0.5U UDG and 0.02U hAPE1. The quantity loss of intact ssDNA (blue) and the quantity increase of SSB-DNA (orange).

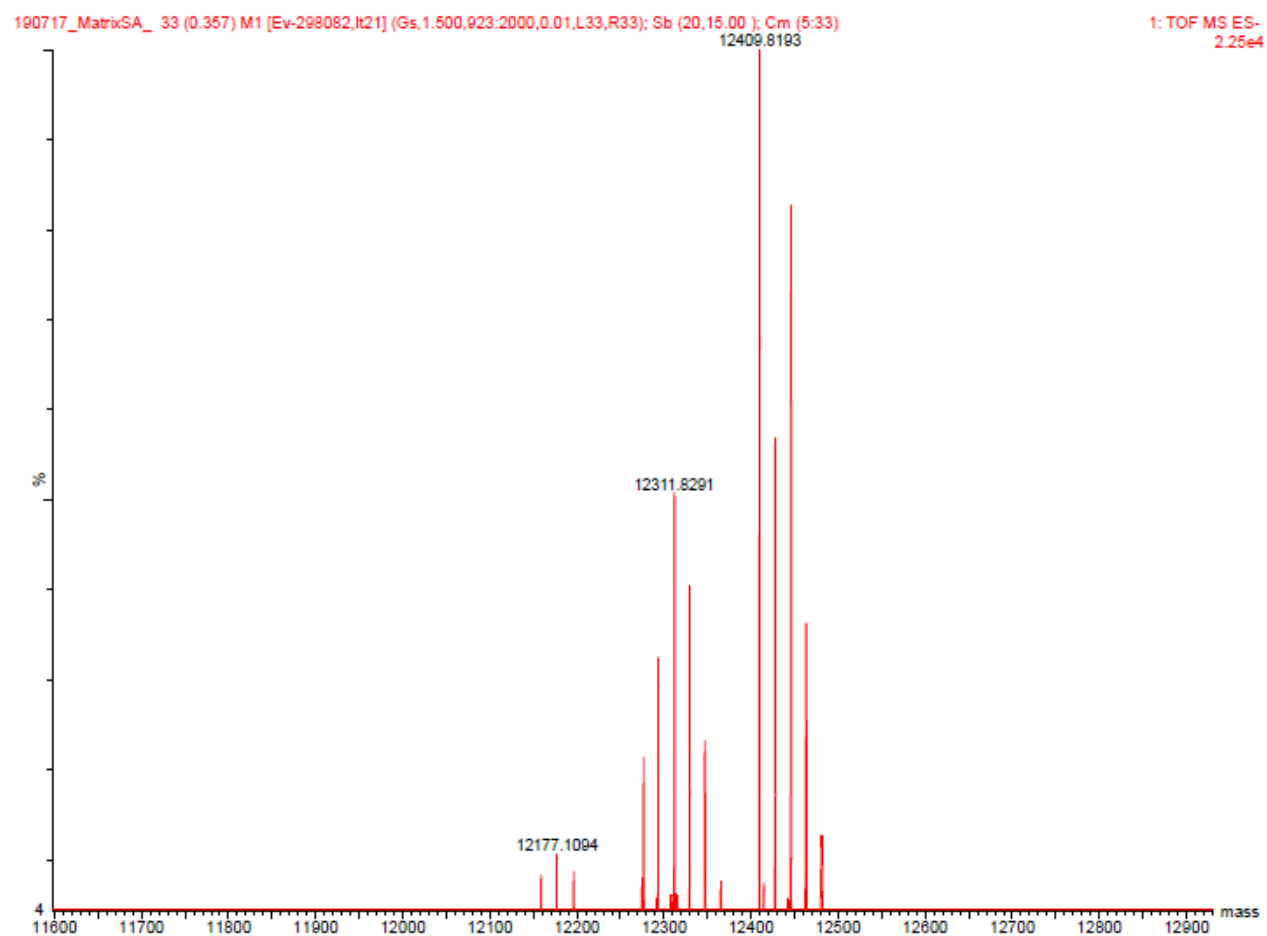

Figure S46. Mass spectrum of Matrix SA.

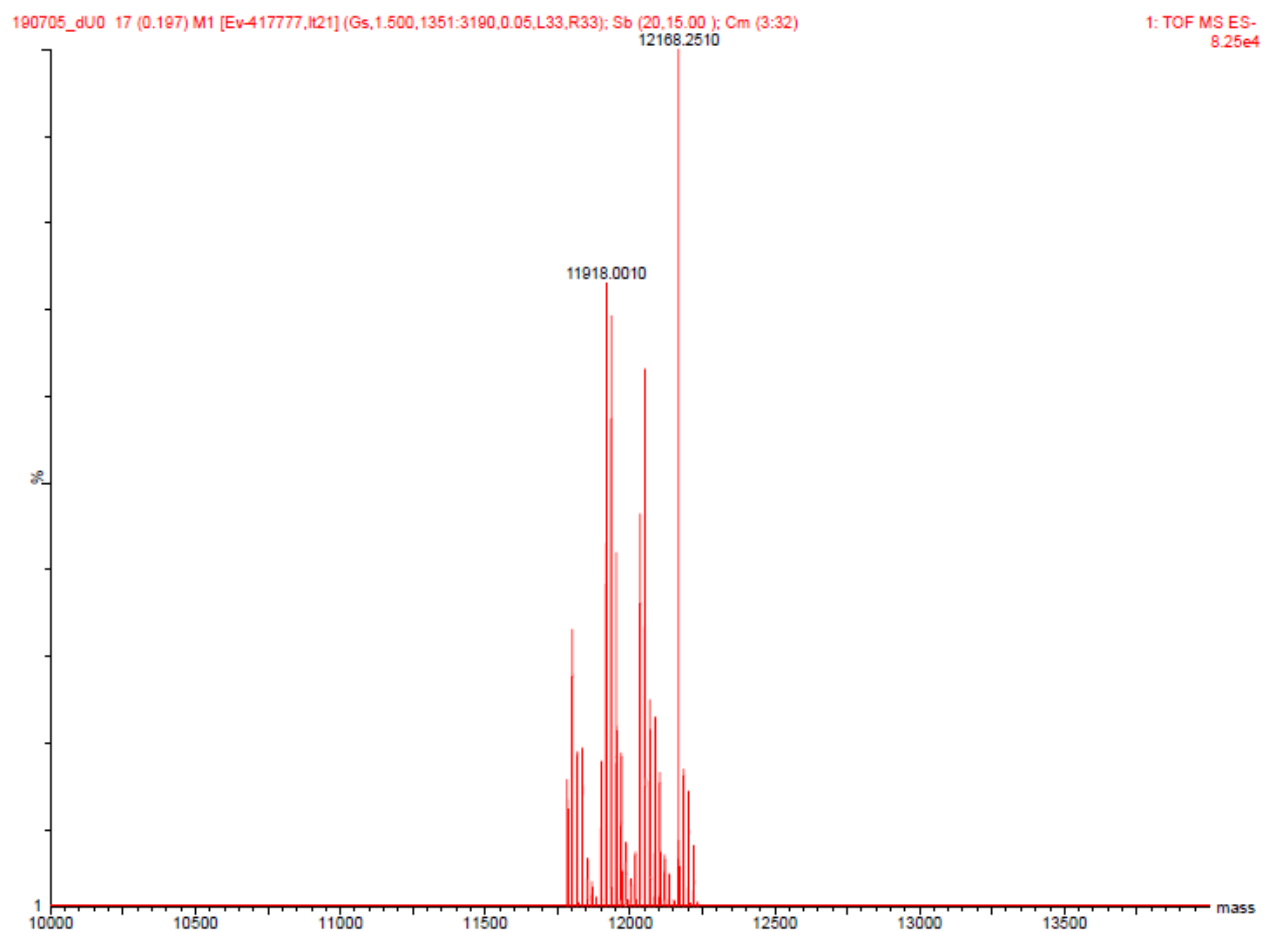

Figure S47. Mass spectrum of dU0.

210218\_dU\_5\_5\_dA 153 (1.557) M1 [Ev0,It18] (Sp,0.030,1002:1764,0.05,L33,R33); Cm (145:197)

1: TOF MS ES-  
9.56e6

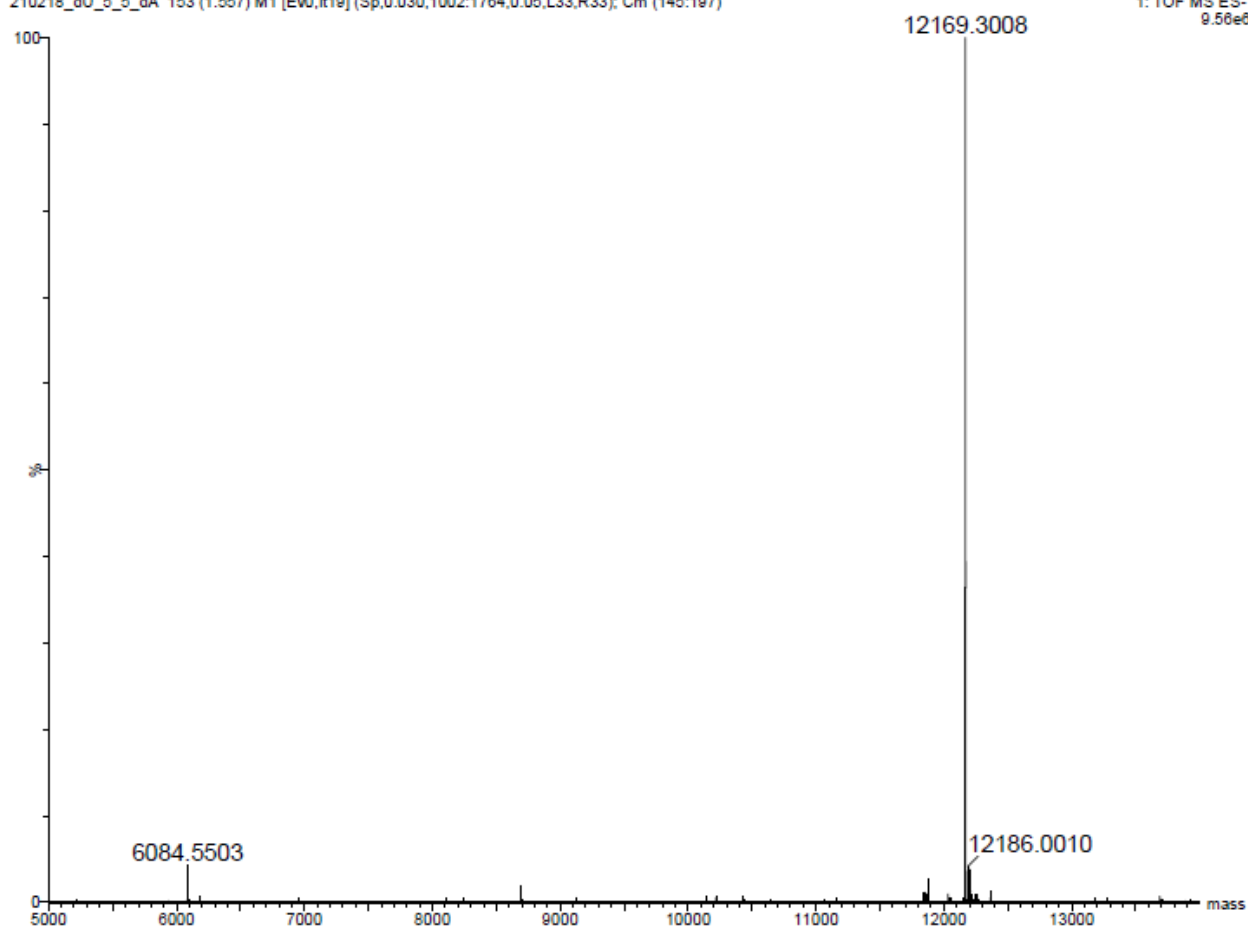

Figure S48. Mass spectrum of dU(-5)(+5)dA.

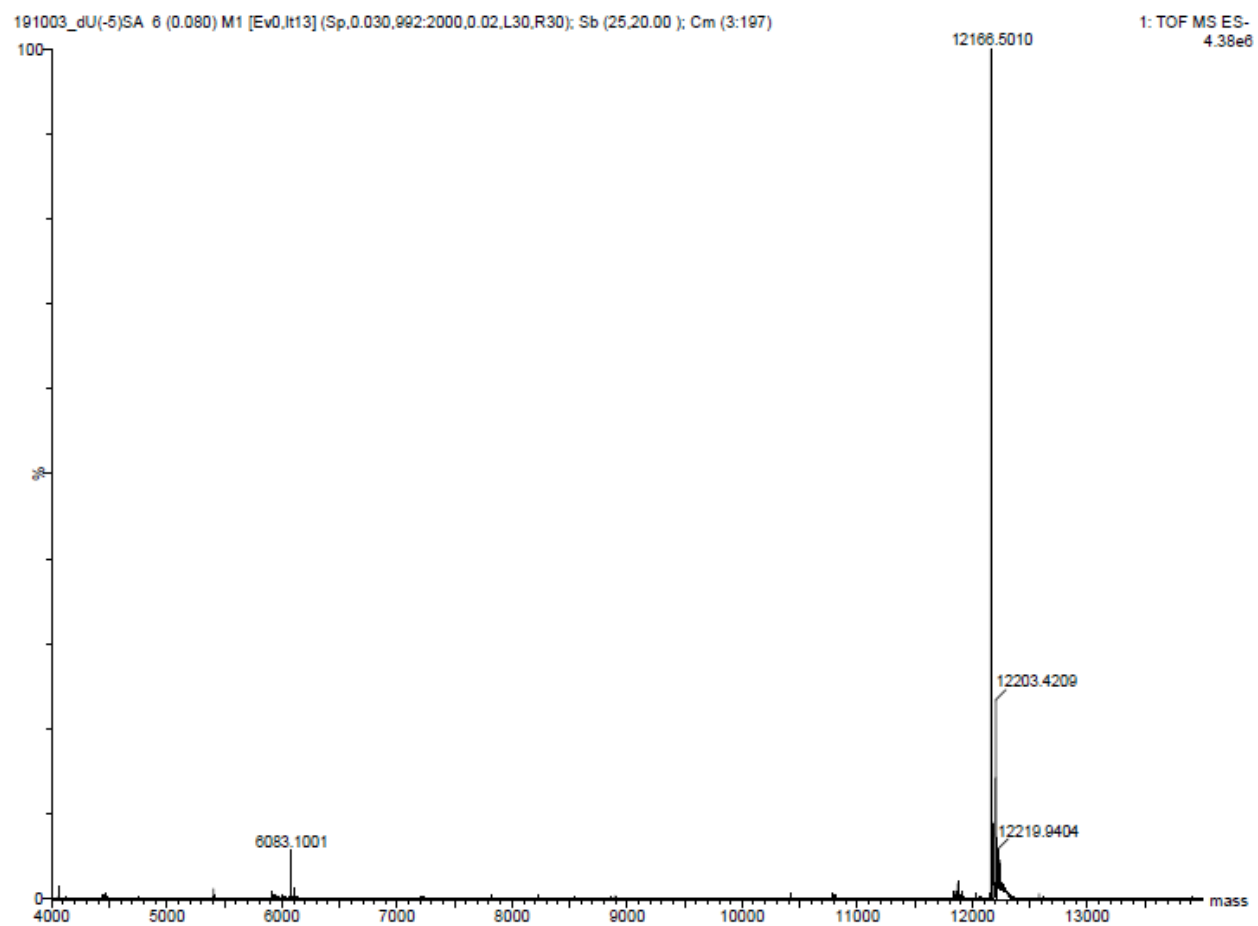

Figure S49. Mass spectrum of dU(-5)SA.

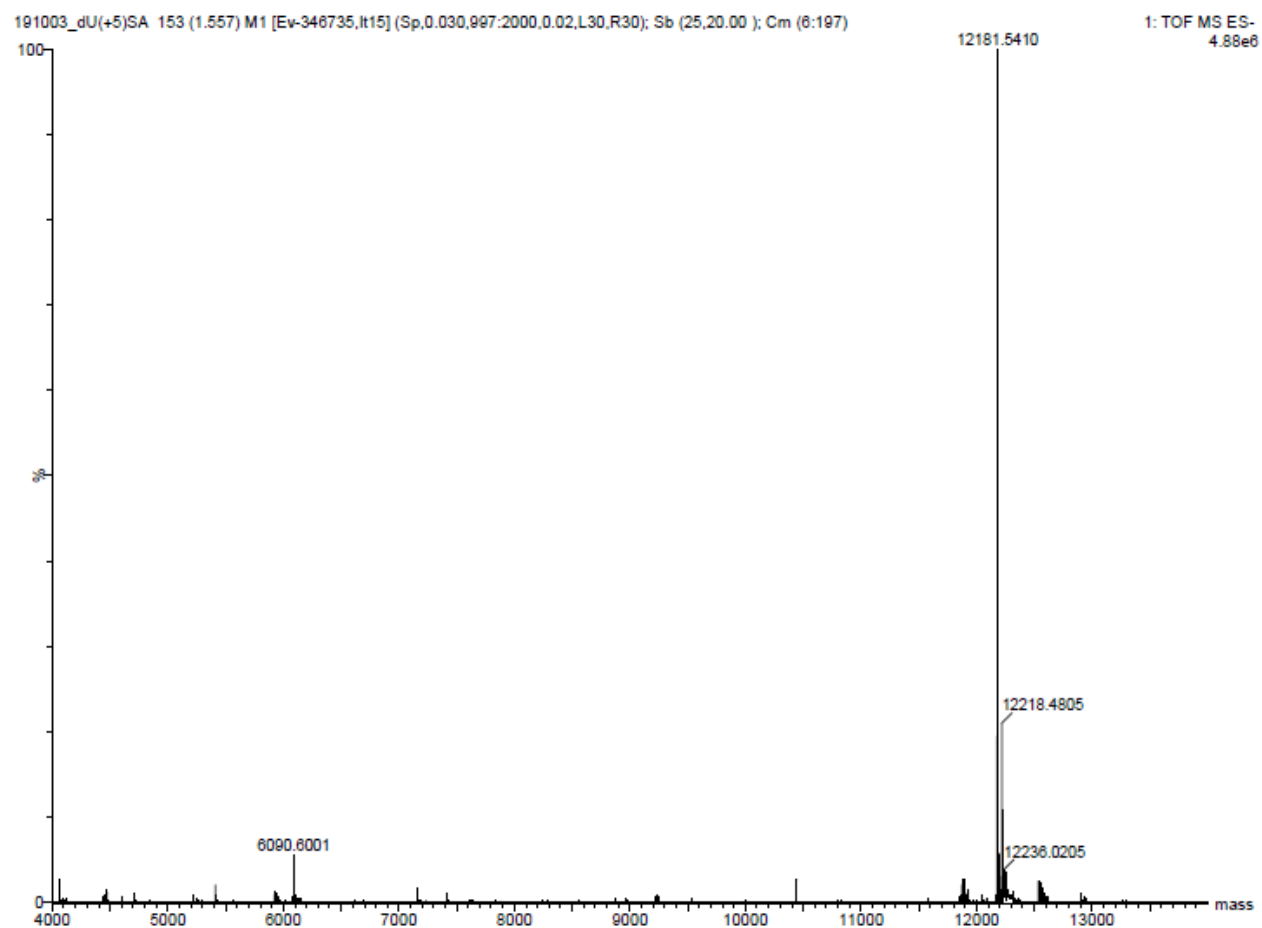

Figure S50. Mass spectrum of dU(+5)SA.

200713\_dU\_5\_5\_SA 41 (0.437) M1 [Ev-524487,It30] (Sp,0.030,560:1837,0.10,L33,R33); Sb (25,10.00 ); Cm (20:185)

1: TOF MS ES-  
2.69e7

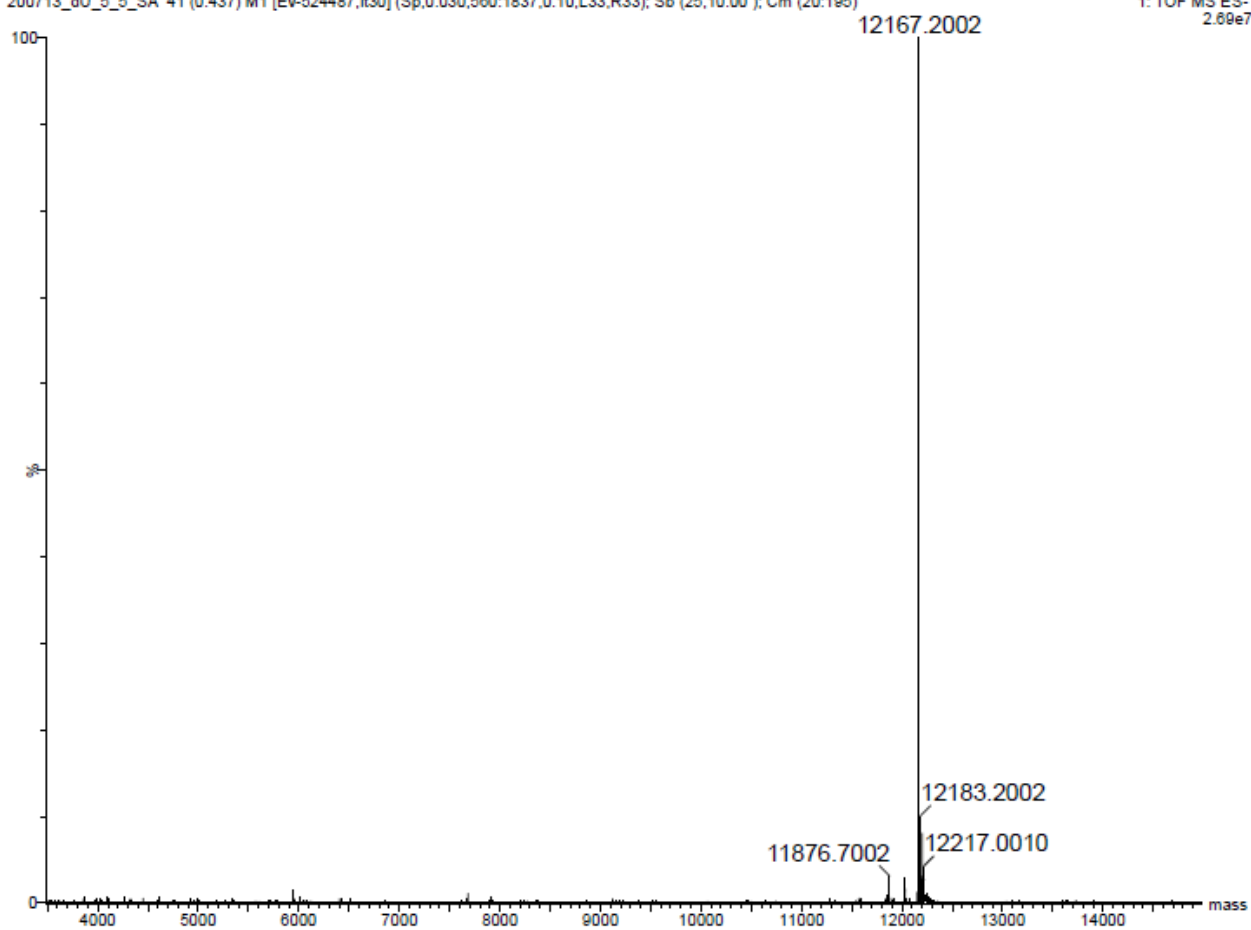

Figure S51. Mass spectrum of dU(-5)(+5)SA.

210219\_dU\_5\_RdA\_ 73 (0.757) M1 [Ev-359413,lt25] (Sp,0.030,800:1767,0.10,L33,R33); Cm (49:197)

1: TOF MS ES-  
1.42e8

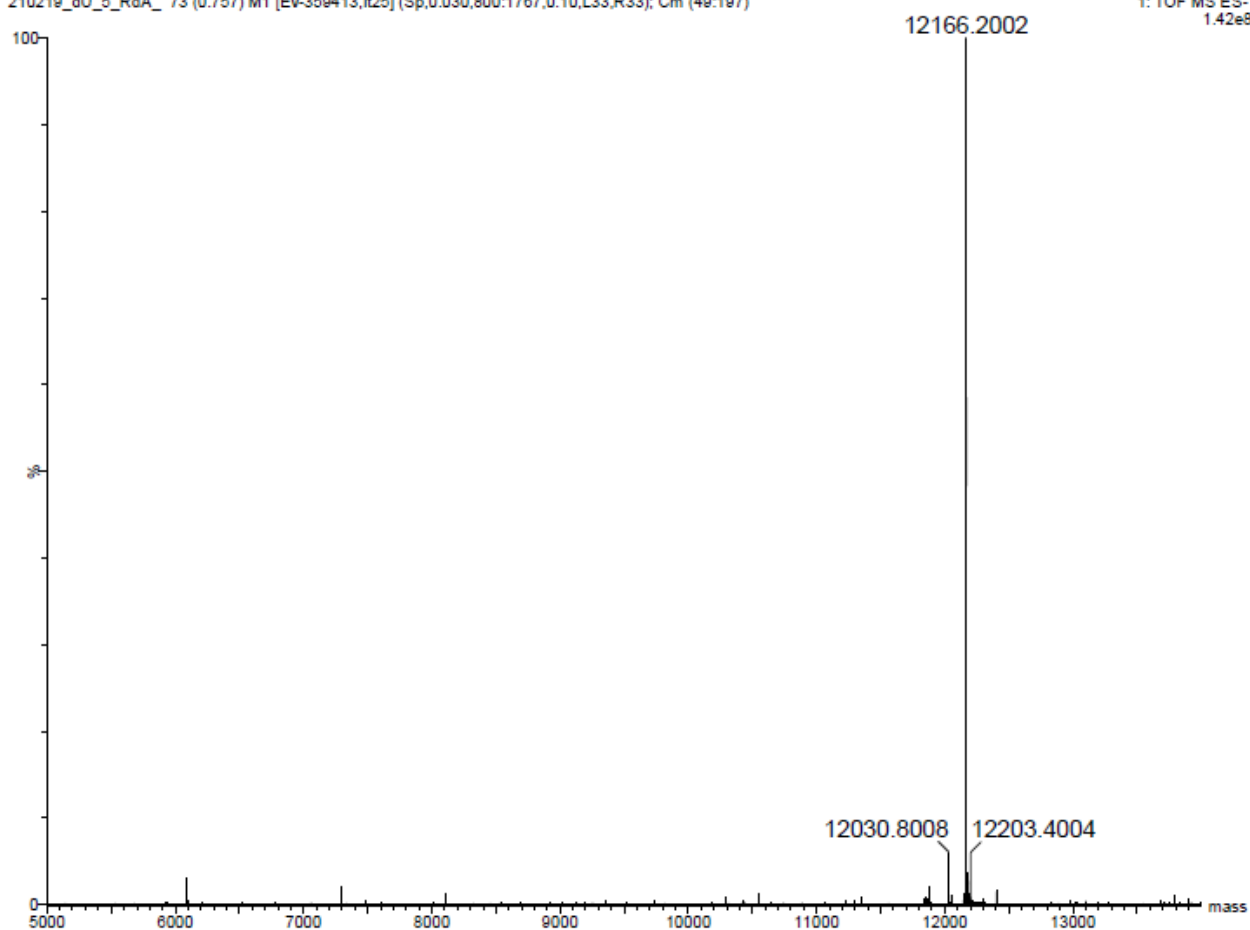

Figure S52. Mass spectrum of dU(-5)RA.



210219\_dU\_5\_RdA 188 (1.903) M1 [Ev-384531,lt25] (Sp,0.030,779:1799,0.10,L33,R33); Cm (65:197)

1: TOF MS ES-  
7.25e7

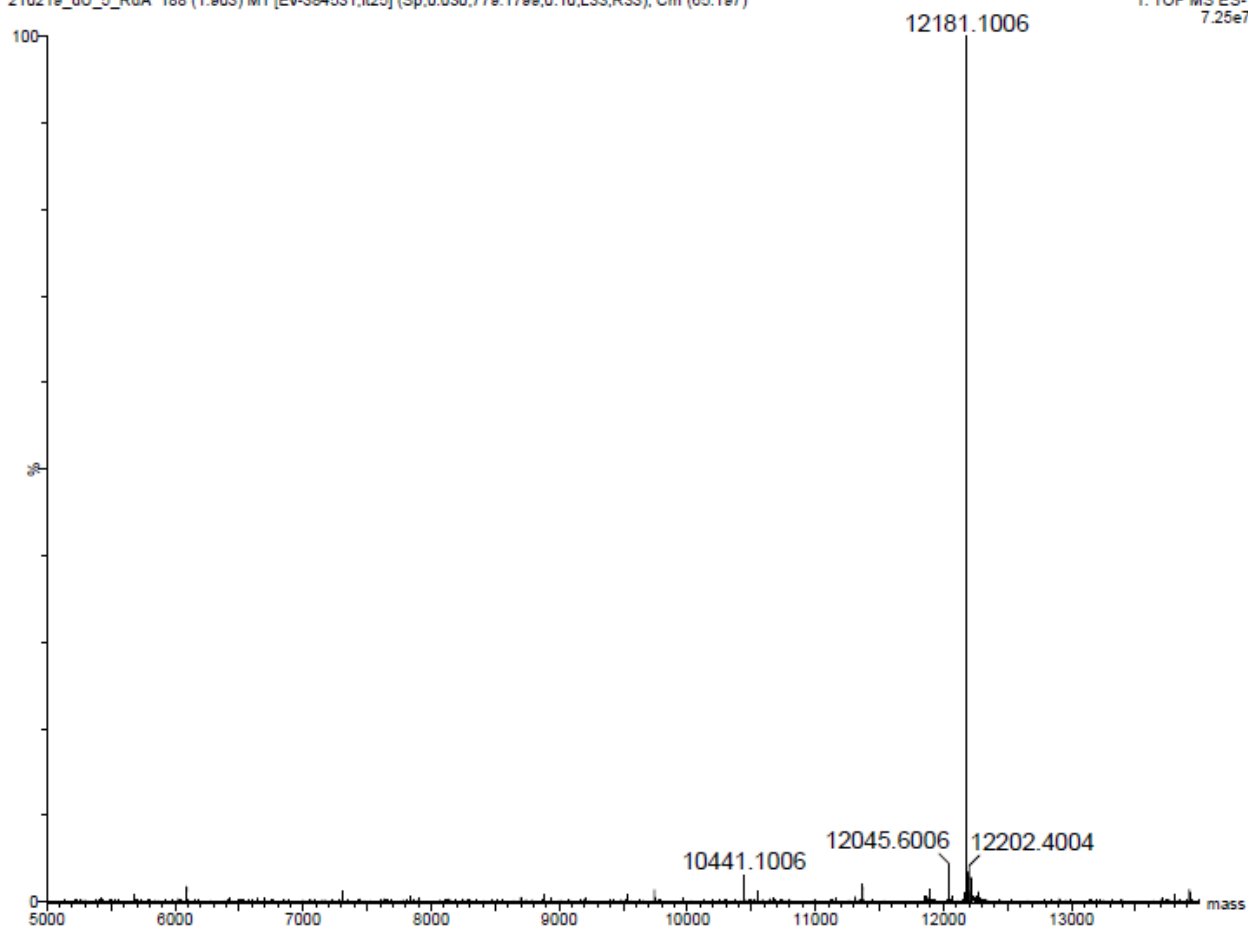

Figure S53. Mass spectrum of dU(+5)RA.

210219\_dU\_-5\_+5\_RdA 89 (0.917) M1 [Ev-380539,It25] (Sp,0.030,781:1782,0.10,L33,R33); Cm (26:196)

1: TOF MS ES-  
1.34e8

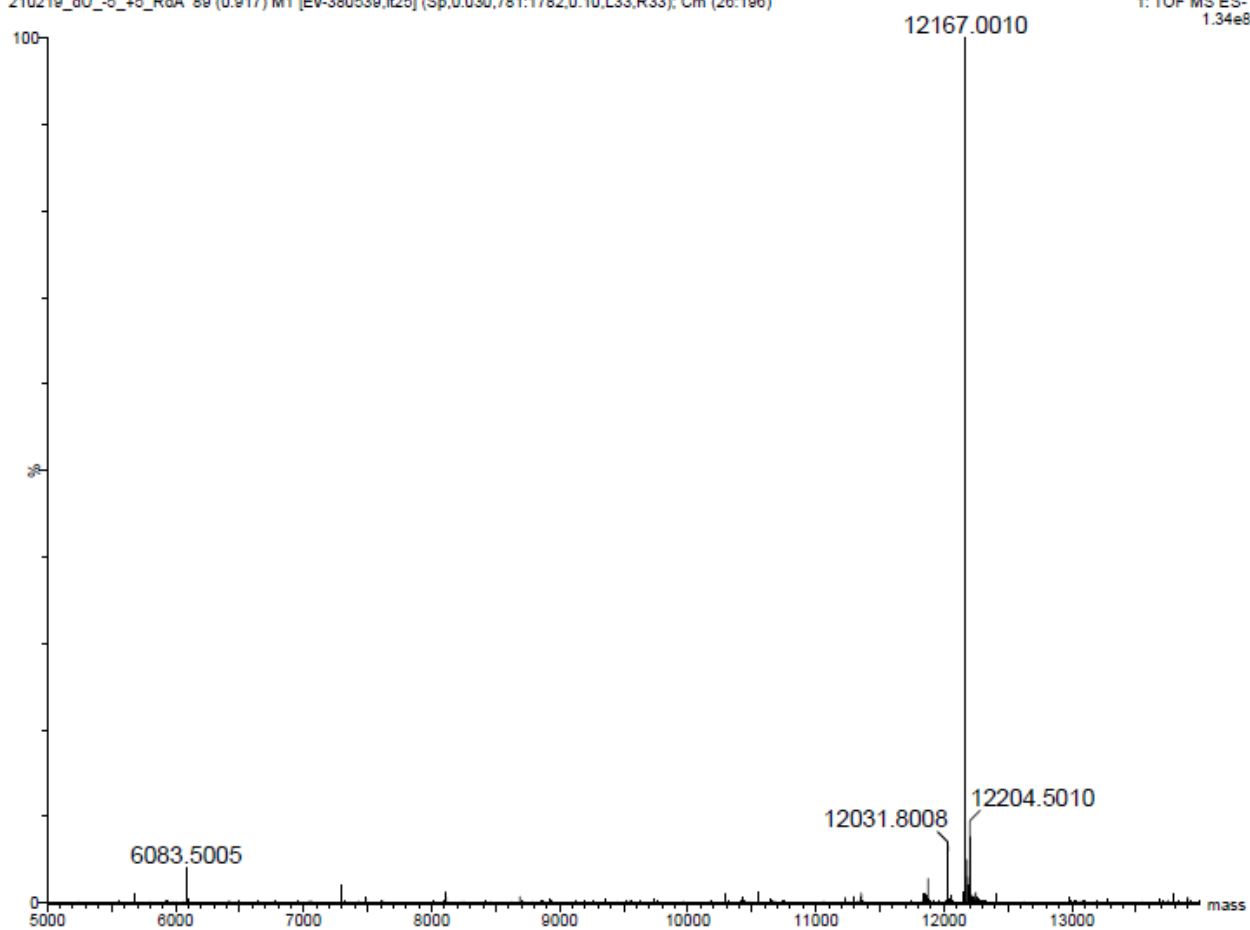

Figure S54. Mass spectrum of dU(-5)(+5)RA.

210218\_dU\_5\_SG 177 (1.797) M1 [Ev-392991,lt25] (Sp,0.030,737:1773,0.10,L33,R33); Cm (33:192)

1: TOF MS ES-  
1.06e8

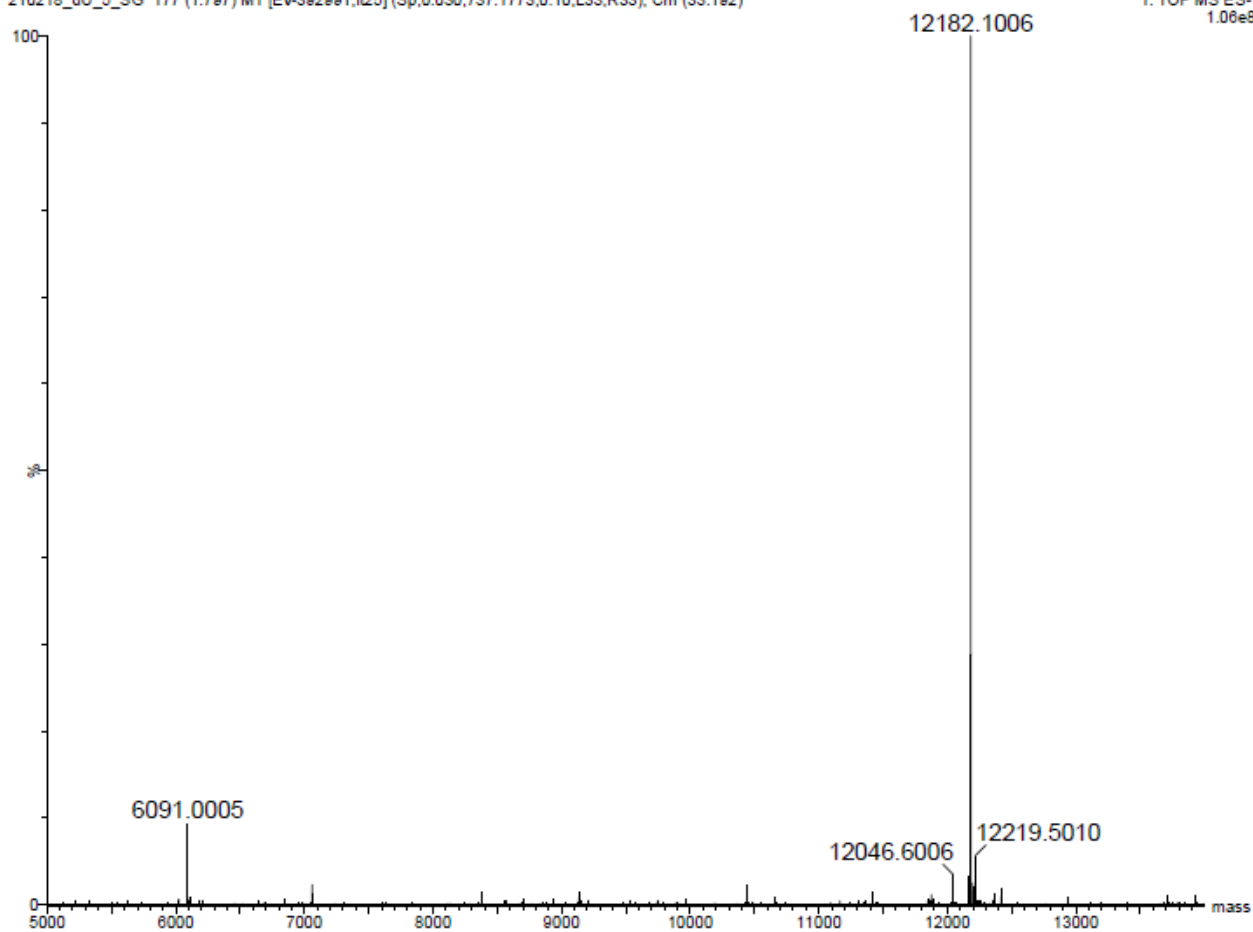

Figure S55. Mass spectrum of dU(-5)SG.

210219\_dU\_+5\_SG 145 (1.477) M1 [Ev-380061,lt25] (Sp,0.030,746:1795,0.10,L33,R33); Cm (115:197)

1: TOF MS ES-  
4.05e7

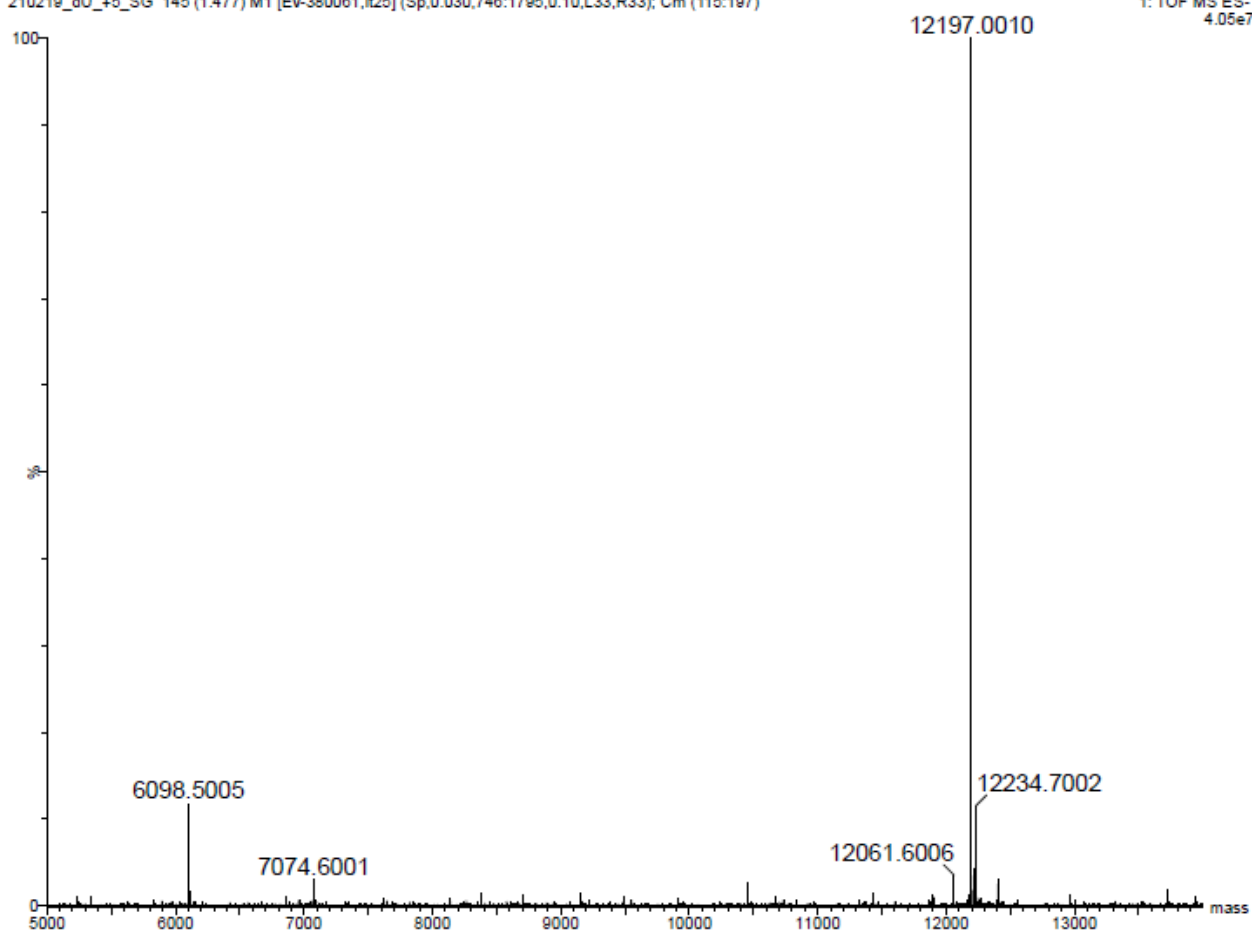

Figure S56. Mass spectrum of dU(+5)SG.

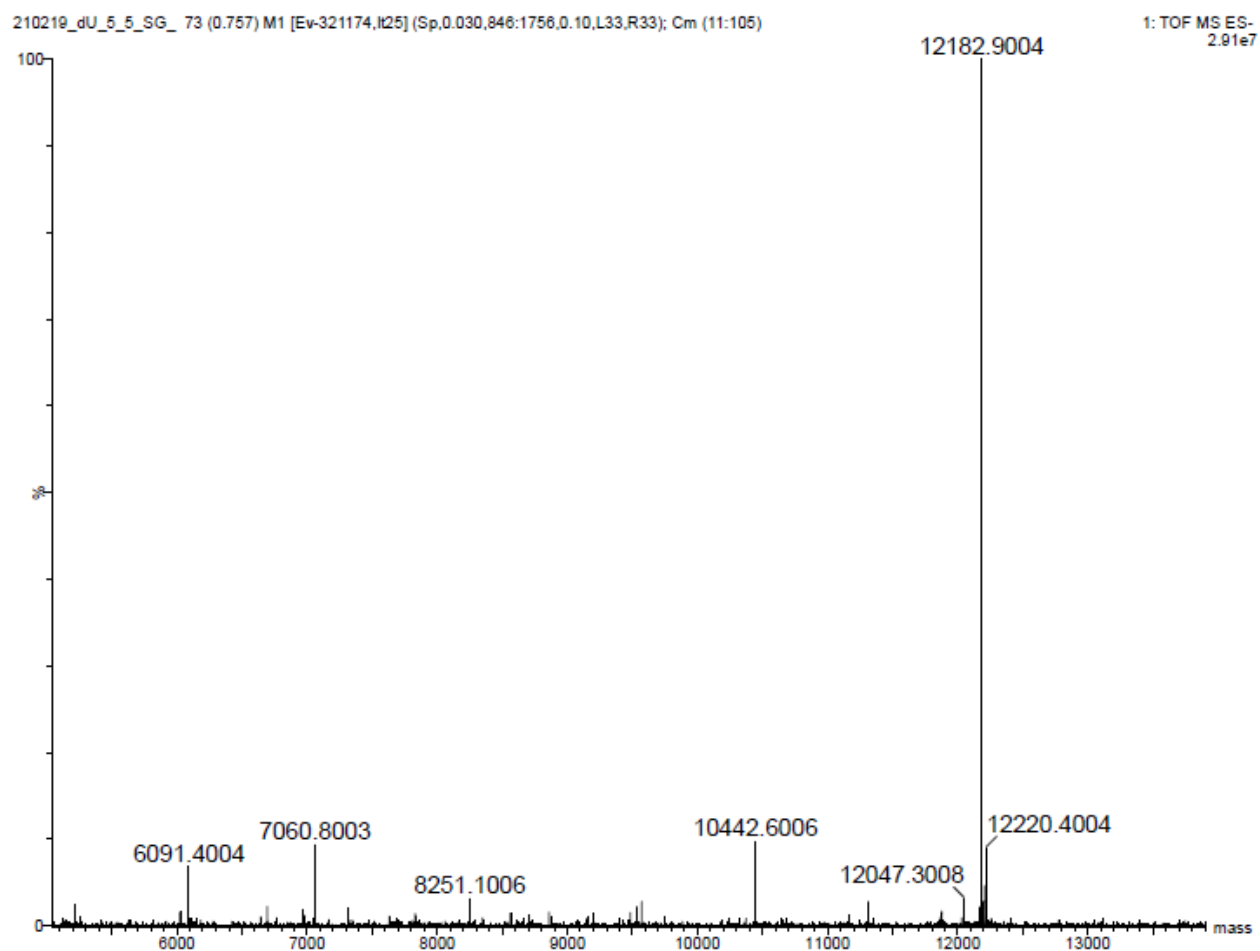

Figure S57. Mass spectrum of dU(-5)(+5)SG.

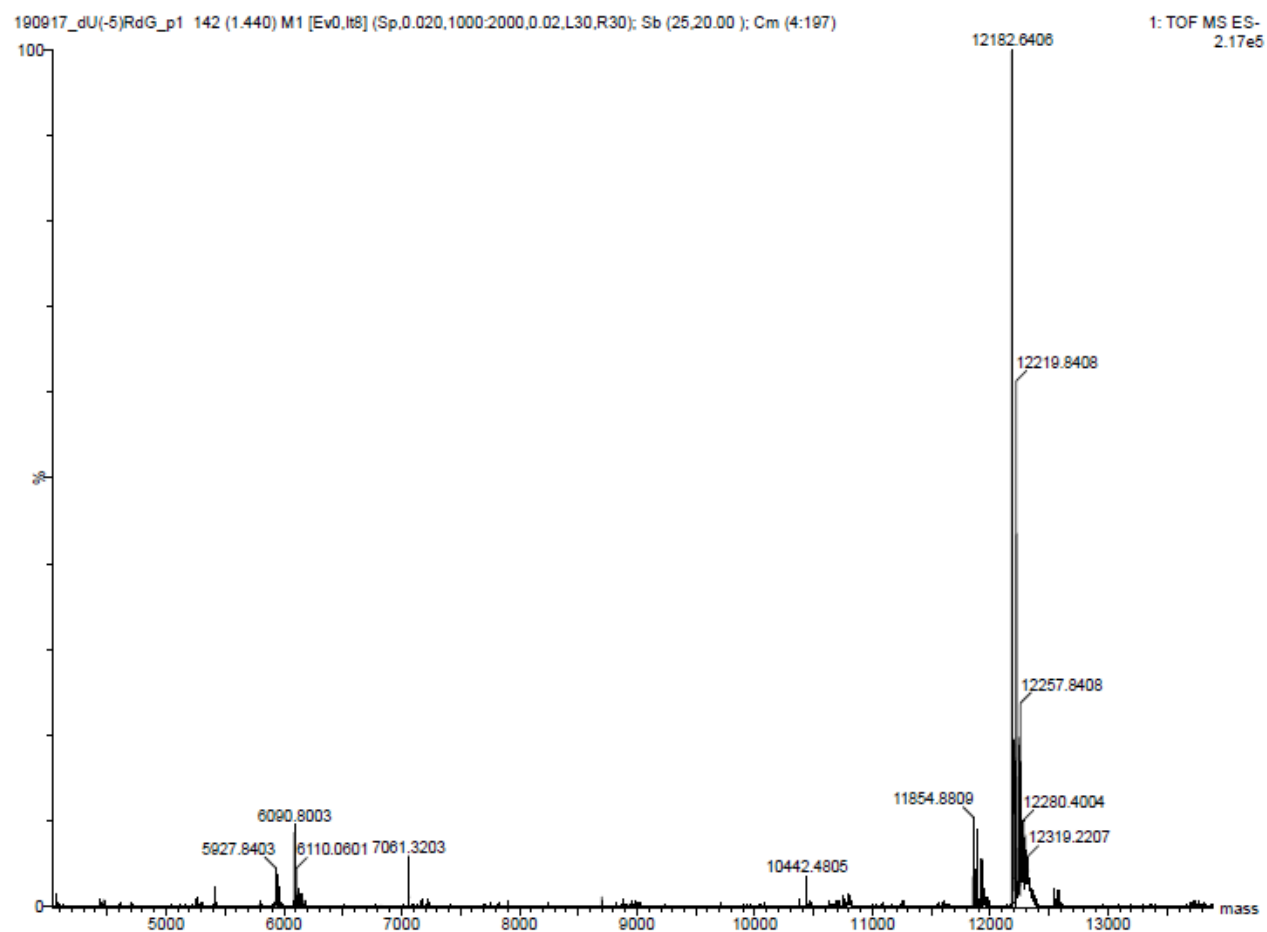

Figure S58. Mass spectrum of dU(-5)RG.

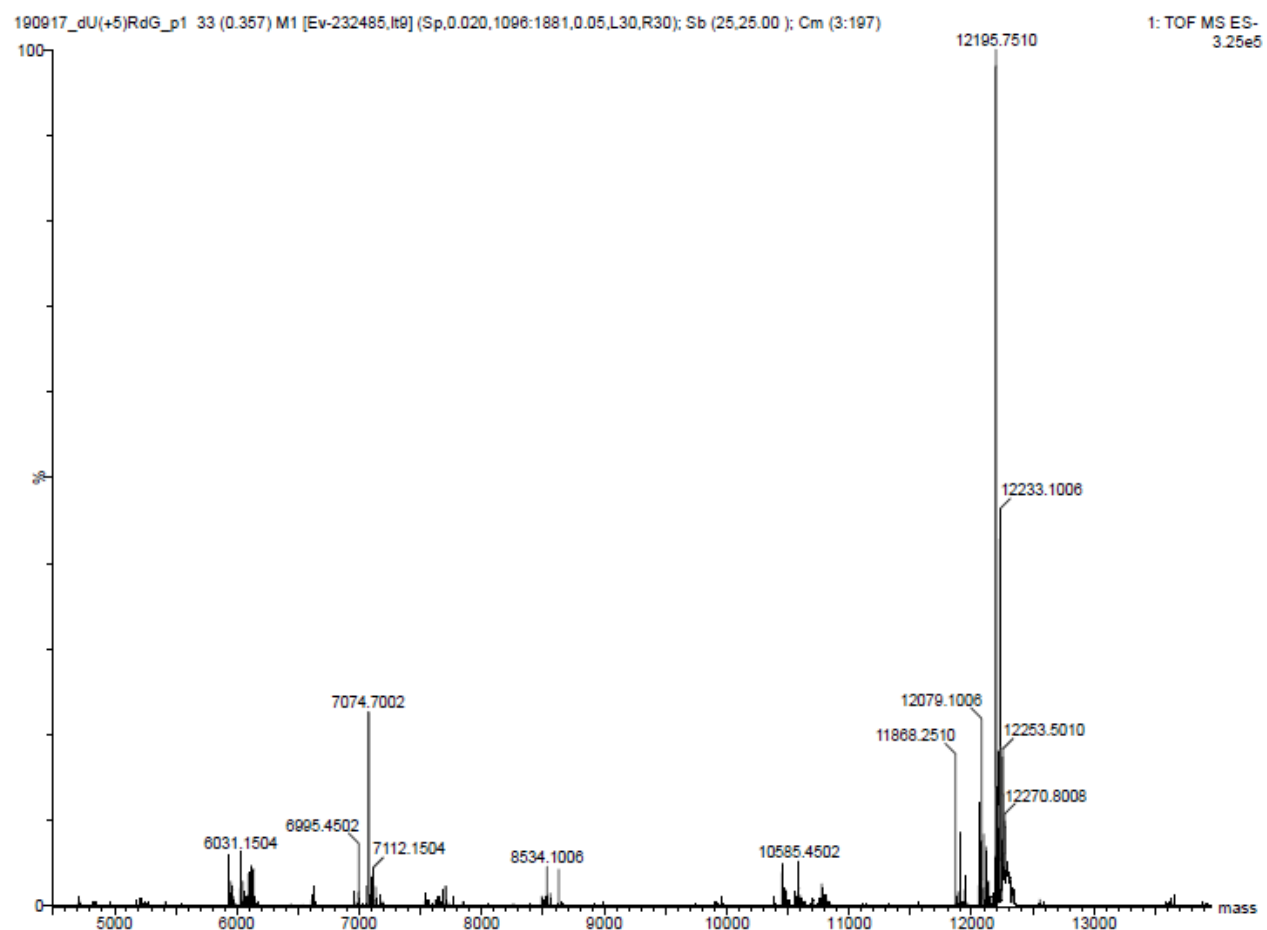

Figure S59. Mass spectrum of dU(+5)RG.

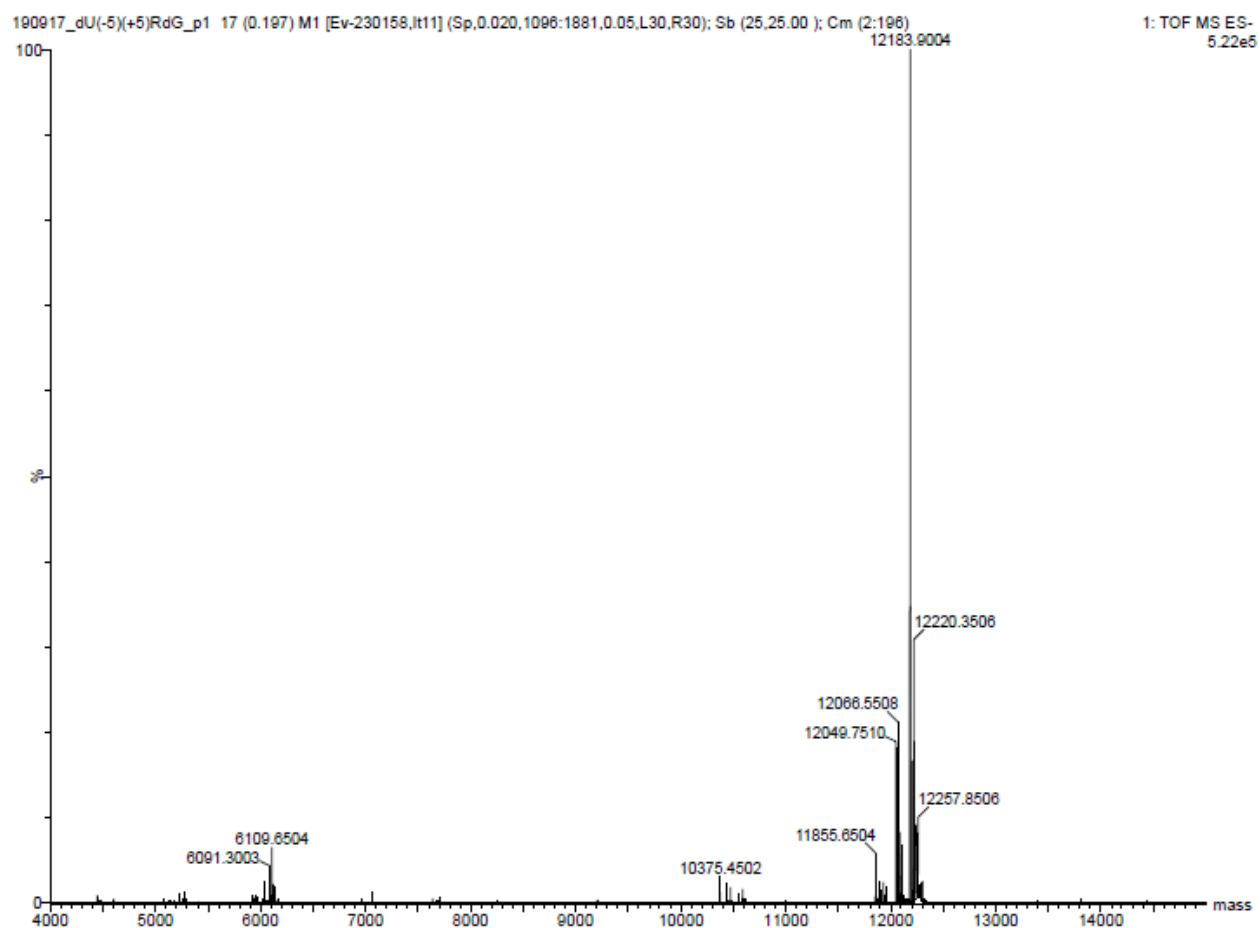

Figure S60. Mass spectrum of dU(-5)(+5)RG.



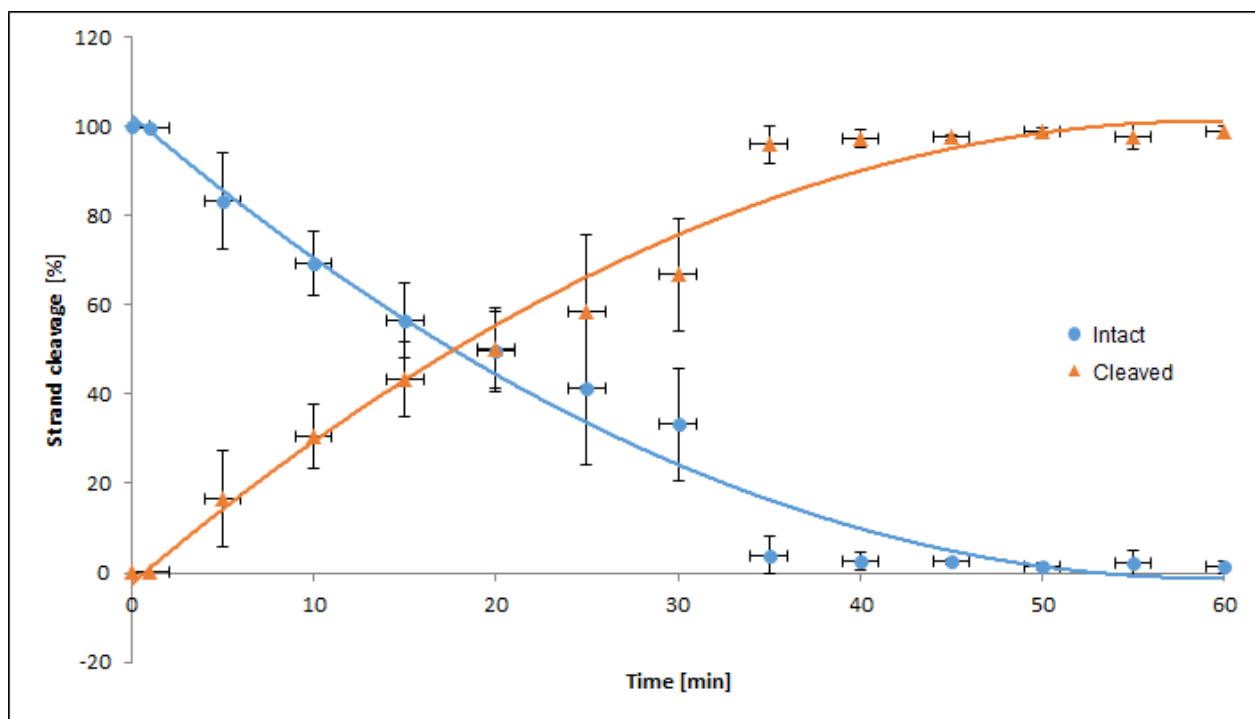

Figure S61. Cleavage assay of dU0 by 0.02U UDG and 0.5U hAPE1. The quantity loss of intact ssDNA (blue) and the quantity increase of SSB-DNA (orange). Error bars are shown.

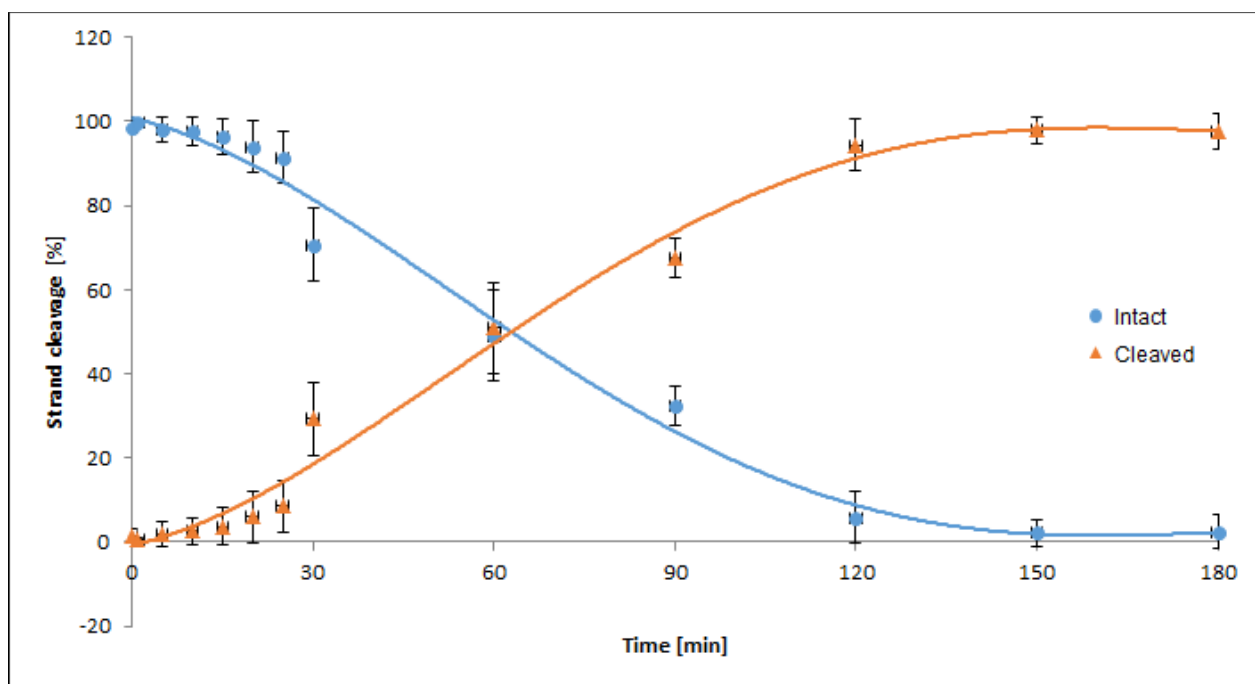

Figure S62. Cleavage assay of dU0 by 0.5U UDG and 0.02U hAPE1. The quantity loss of intact ssDNA (blue) and the quantity increase of SSB-DNA (orange). Error bars are shown.

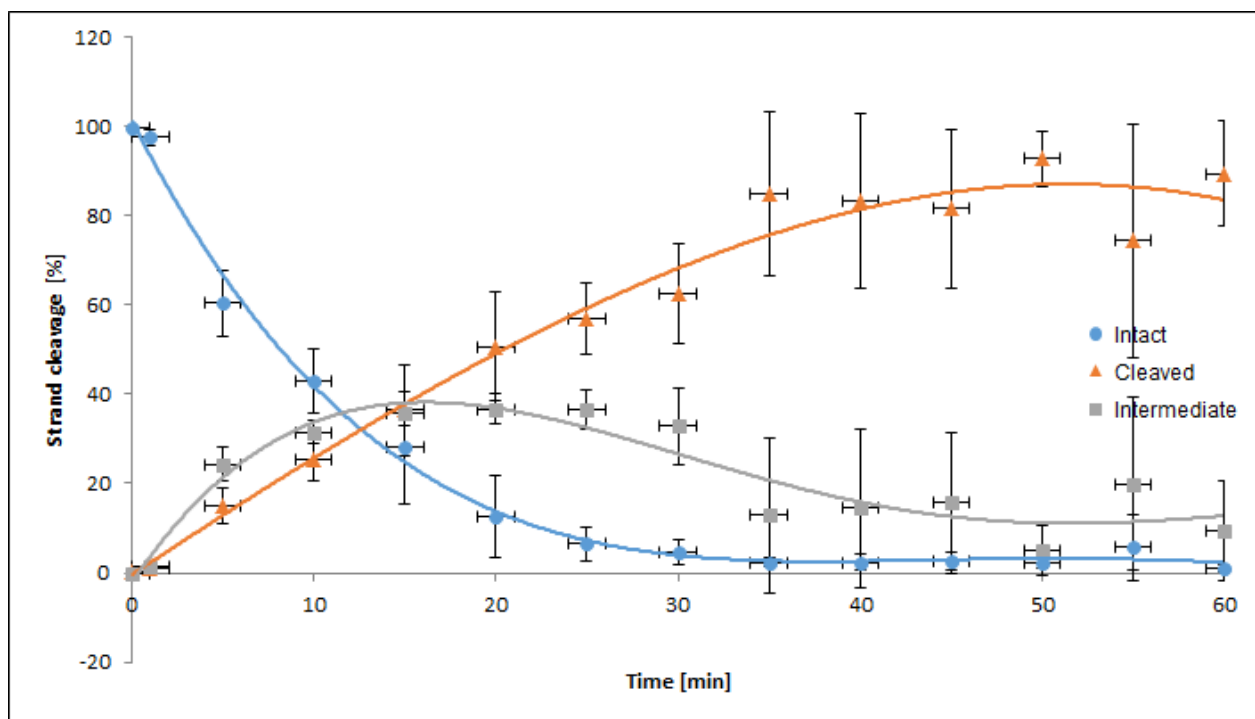

Figure S63. Cleavage assay of dU(-5)(+5)dA by 0.02U UDG and 0.5U hAPE1. The quantity loss of intact ssDNA (blue), the quantity increase of SSB-DNA (orange) and an intermediate oligo fragment (grey). Error bars are shown.

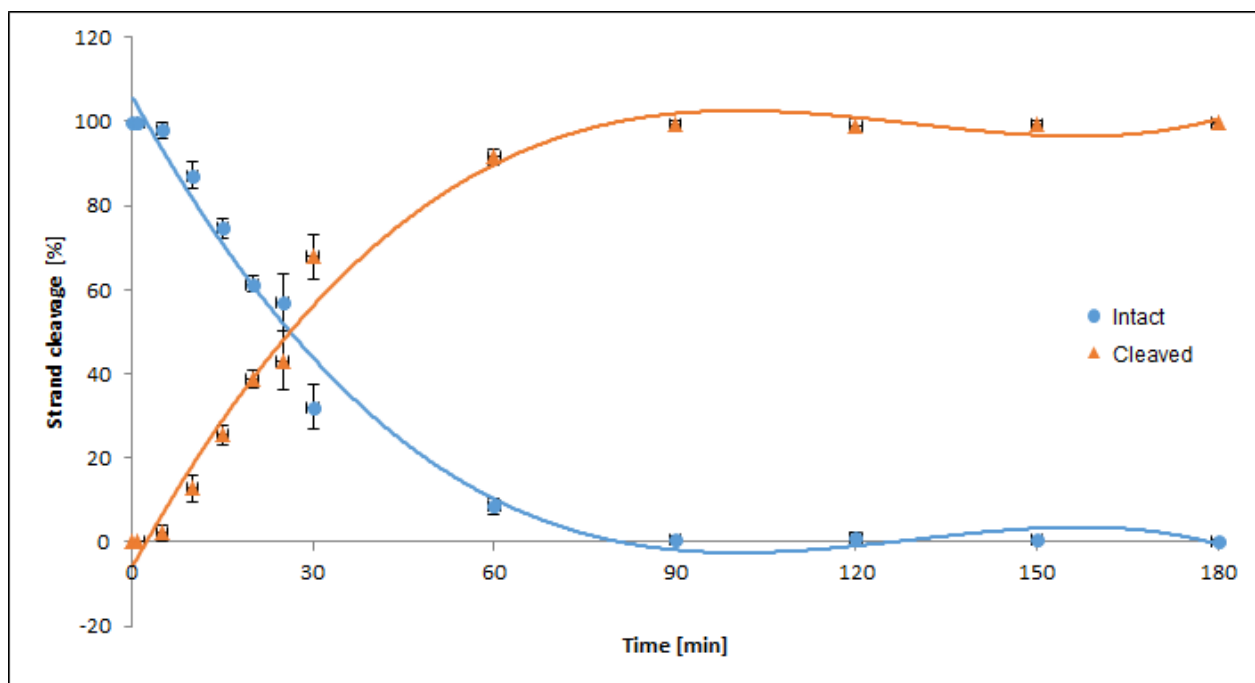

Figure S64. Cleavage assay of dU(-5)(+5)dA by 0.5U UDG and 0.02U hAPE1. The quantity loss of intact ssDNA (blue) and the quantity increase of SSB-DNA (orange). Error bars are shown.

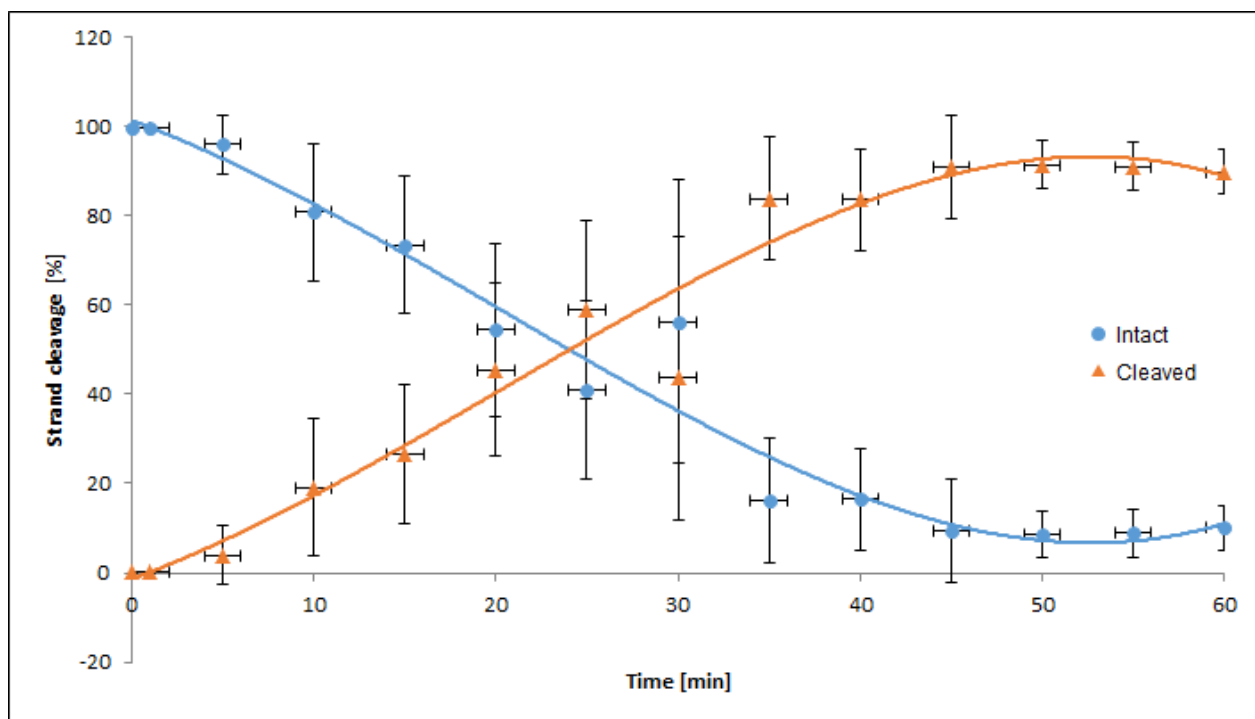

Figure S65. Cleavage assay of dU(-5)ScdA by 0.02U UDG and 0.5U hAPE1. The quantity loss of intact ssDNA (blue) and the quantity increase of SSB-DNA (orange). Error bars are shown.

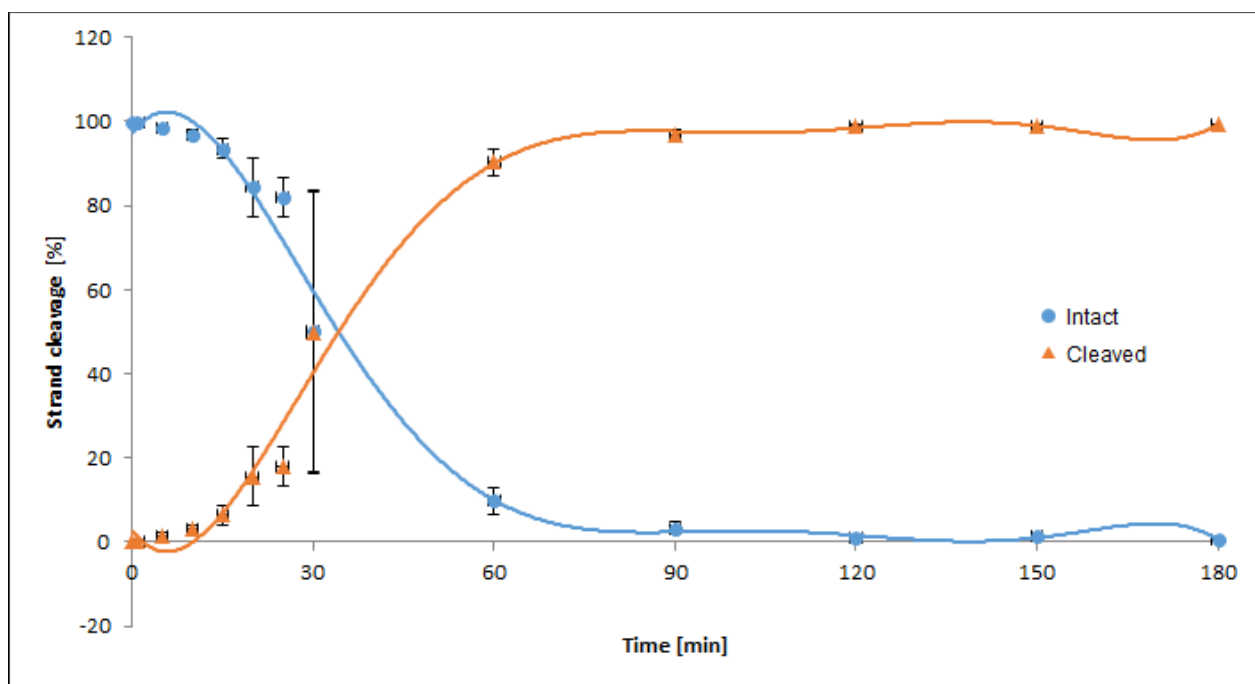

Figure S66. Cleavage assay of dU(-5)ScdA by 0.5U UDG and 0.02U hAPE1. The quantity loss of intact ssDNA (blue) and the quantity increase of SSB-DNA (orange). Error bars are shown.

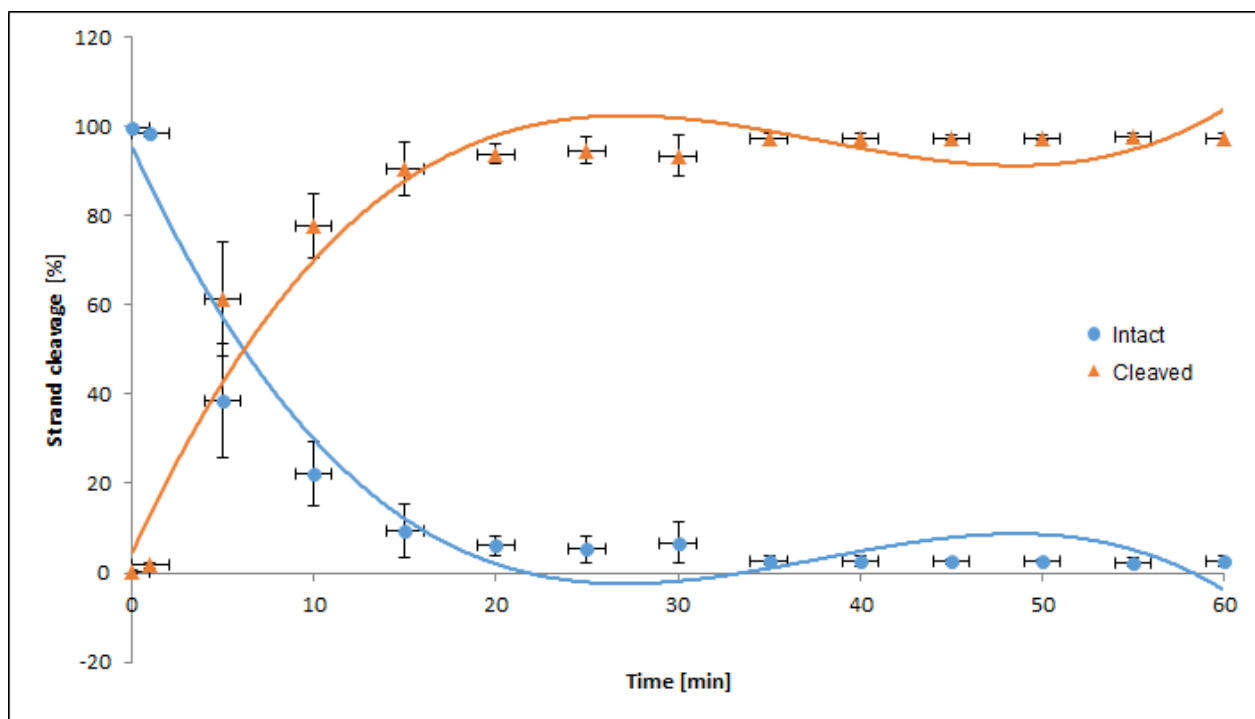

Figure S67. Cleavage assay of dU(+5)ScdA by 0.02U UDG and 0.5U hAPE1. The quantity loss of intact ssDNA (blue) and the quantity increase of SSB-DNA (orange). Error bars are shown.

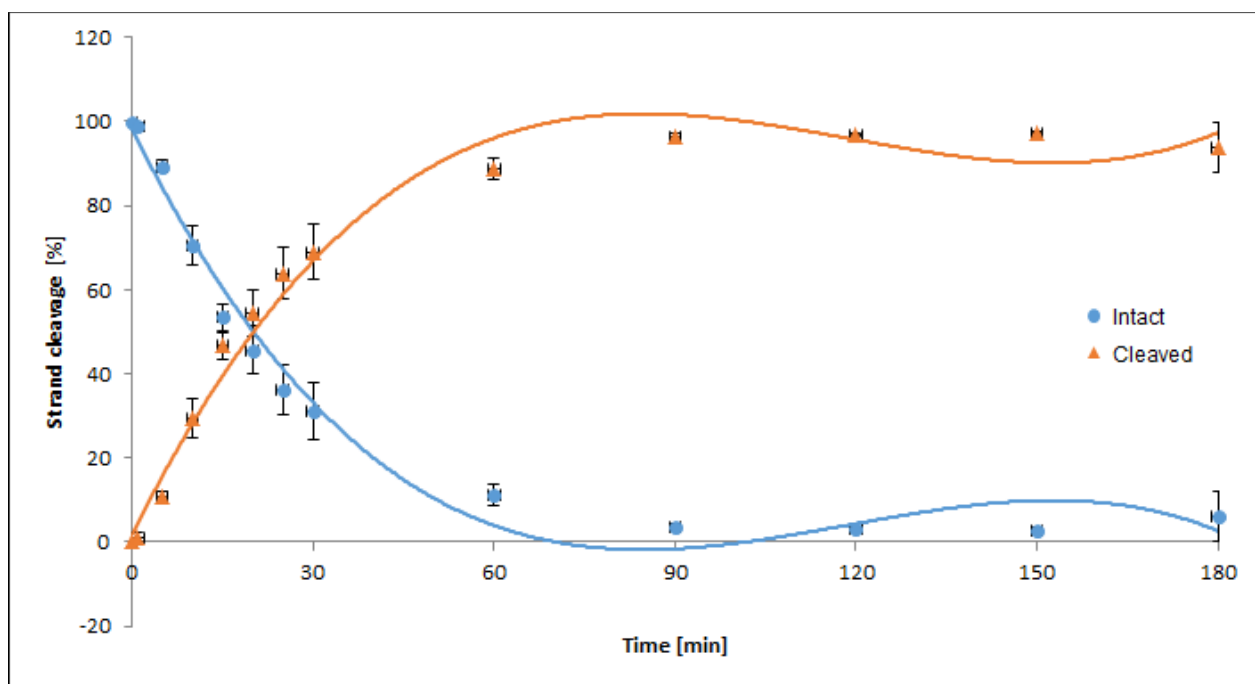

Figure S68. Cleavage assay of dU(+5)ScdA by 0.5U UDG and 0.02U hAPE1. The quantity loss of intact ssDNA (blue) and the quantity increase of SSB-DNA (orange). Error bars are shown.

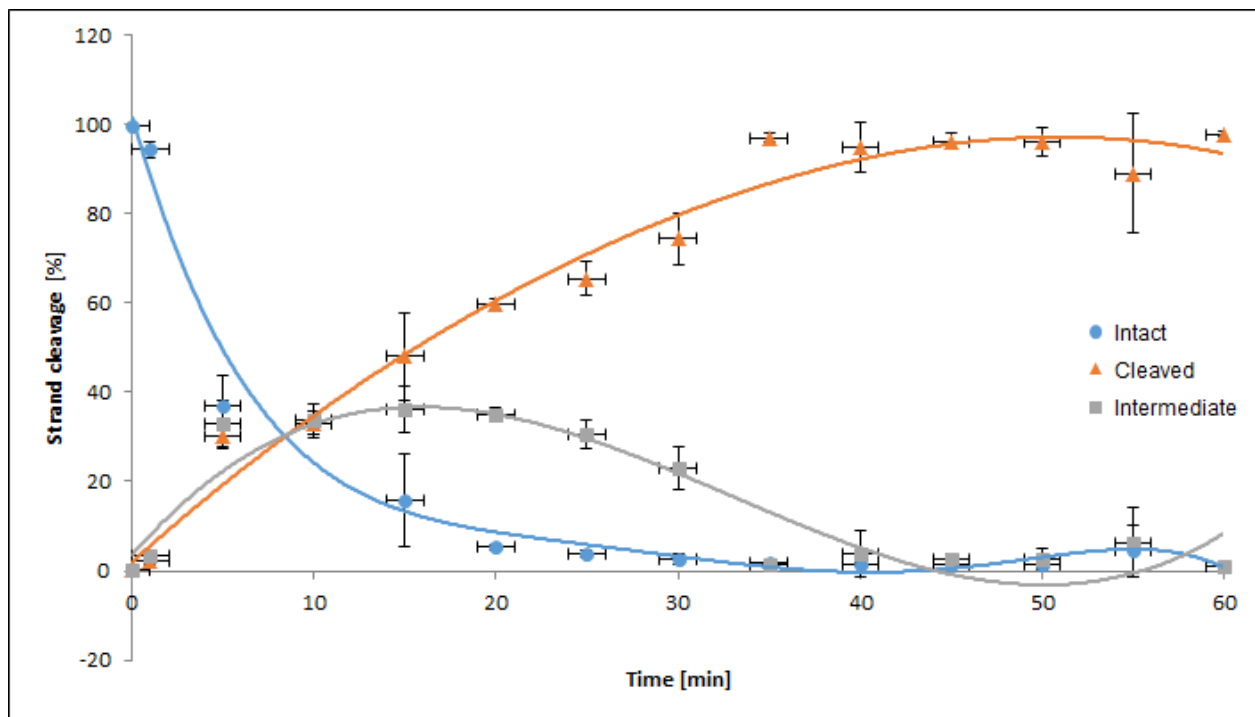

Figure S69. Cleavage assay of dU(-5)(+5)ScdA by 0.02U UDG and 0.5U hAPE1. The quantity loss of intact ssDNA (blue), the quantity increase of SSB-DNA (orange) and an intermediate oligo fragment (grey). Error bars are shown.

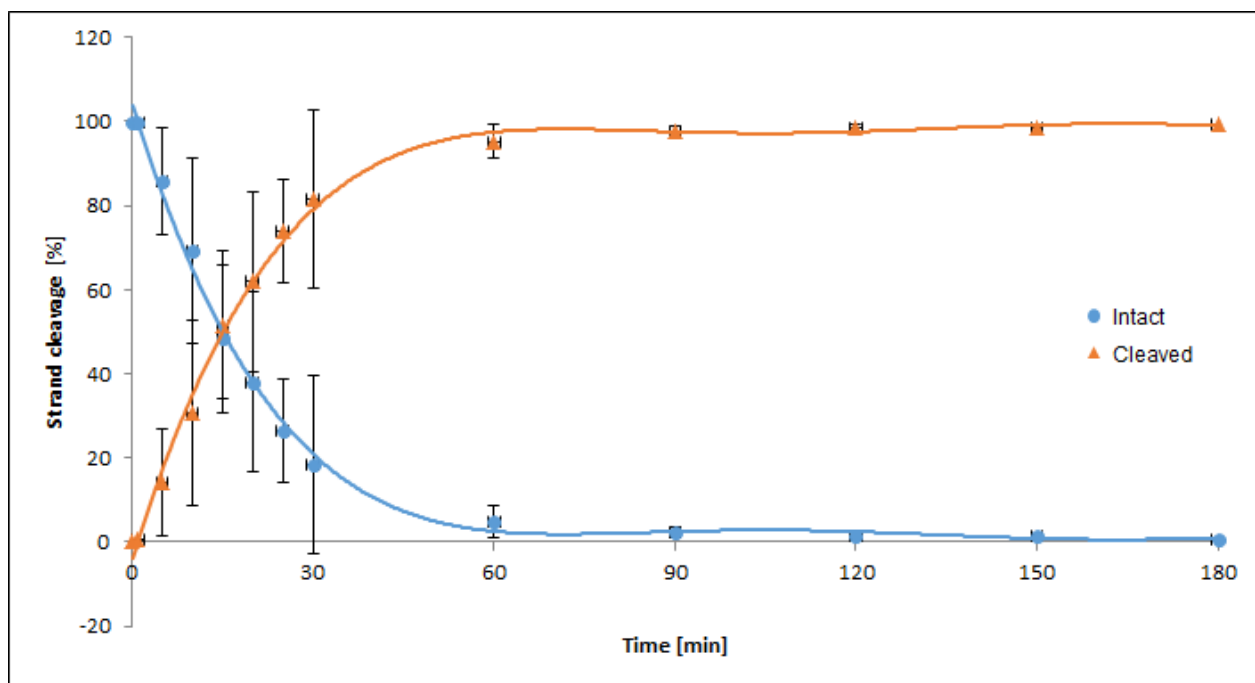

Figure S70. Cleavage assay of dU(-5)(+5)ScdA by 0.5U UDG and 0.02U hAPE1. The quantity loss of intact ssDNA (blue) and the quantity increase of SSB-DNA (orange). Error bars are shown.

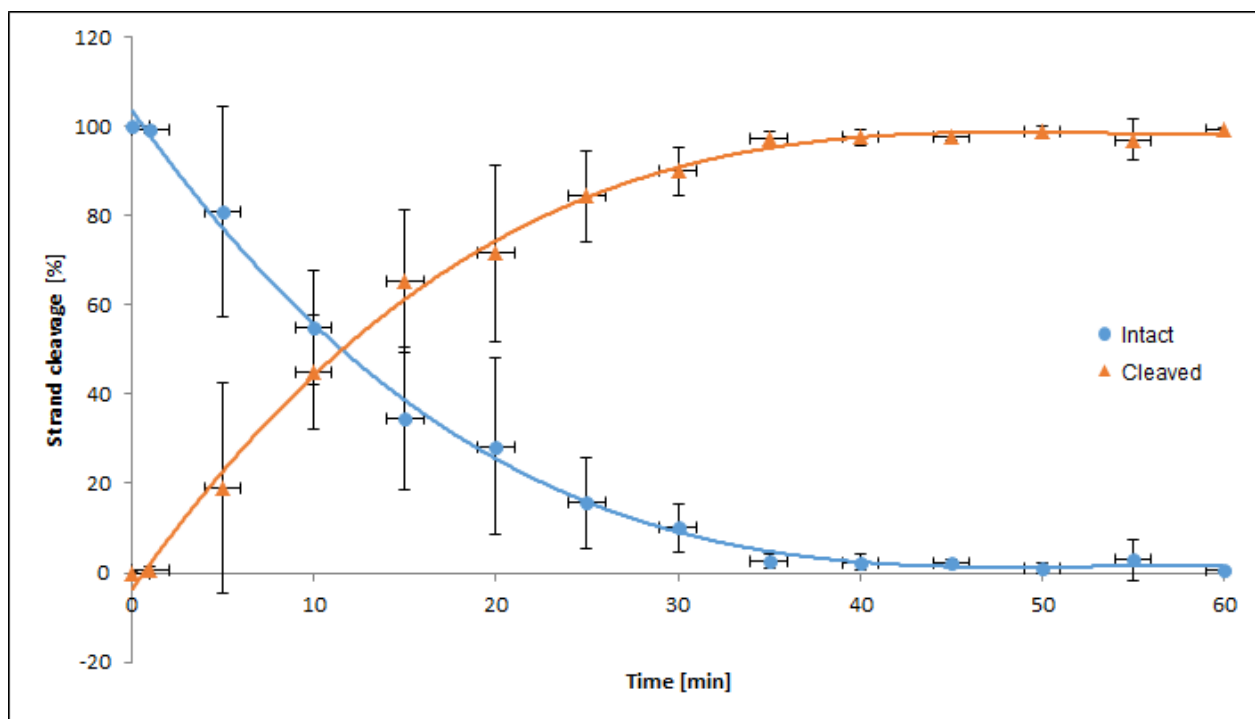

Figure S71. Cleavage assay of dU(-5)RcdA by 0.02U UDG and 0.5U hAPE1. The quantity loss of intact ssDNA (blue) and the quantity increase of SSB-DNA (orange). Error bars are shown.

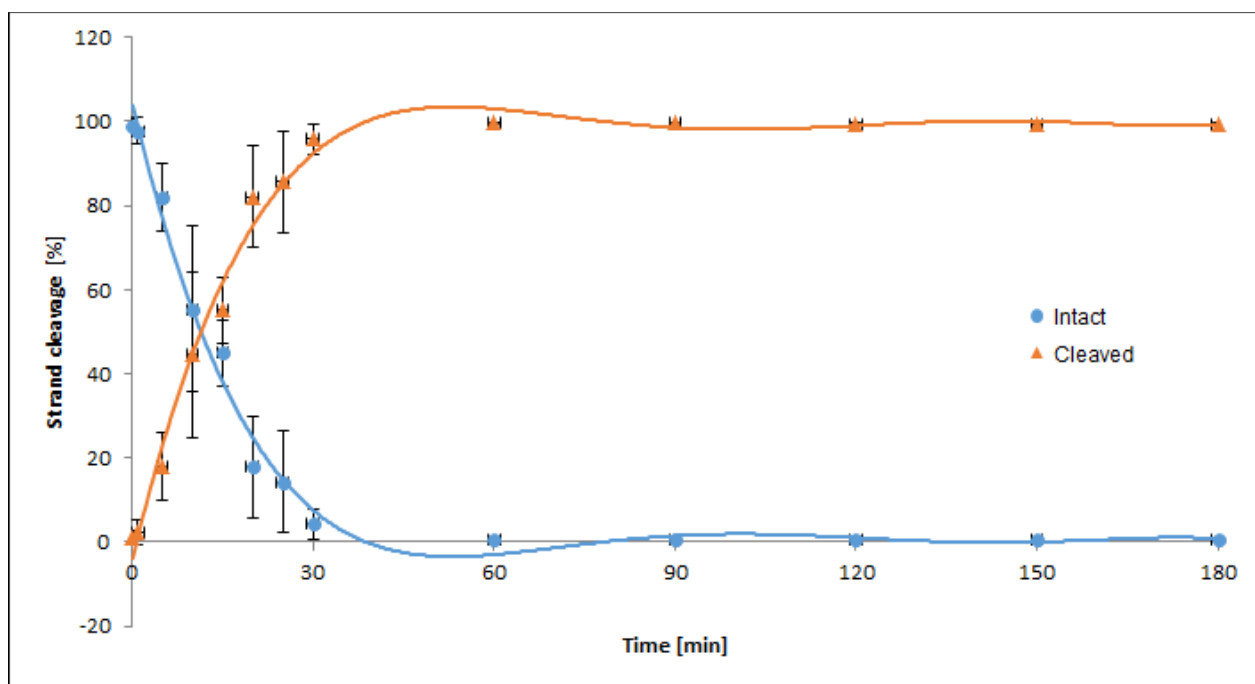

Figure S72. Cleavage assay of dU(-5)RcdA by 0.5U UDG and 0.02U hAPE1. The quantity loss of intact ssDNA (blue) and the quantity increase of SSB-DNA (orange). Error bars are shown.

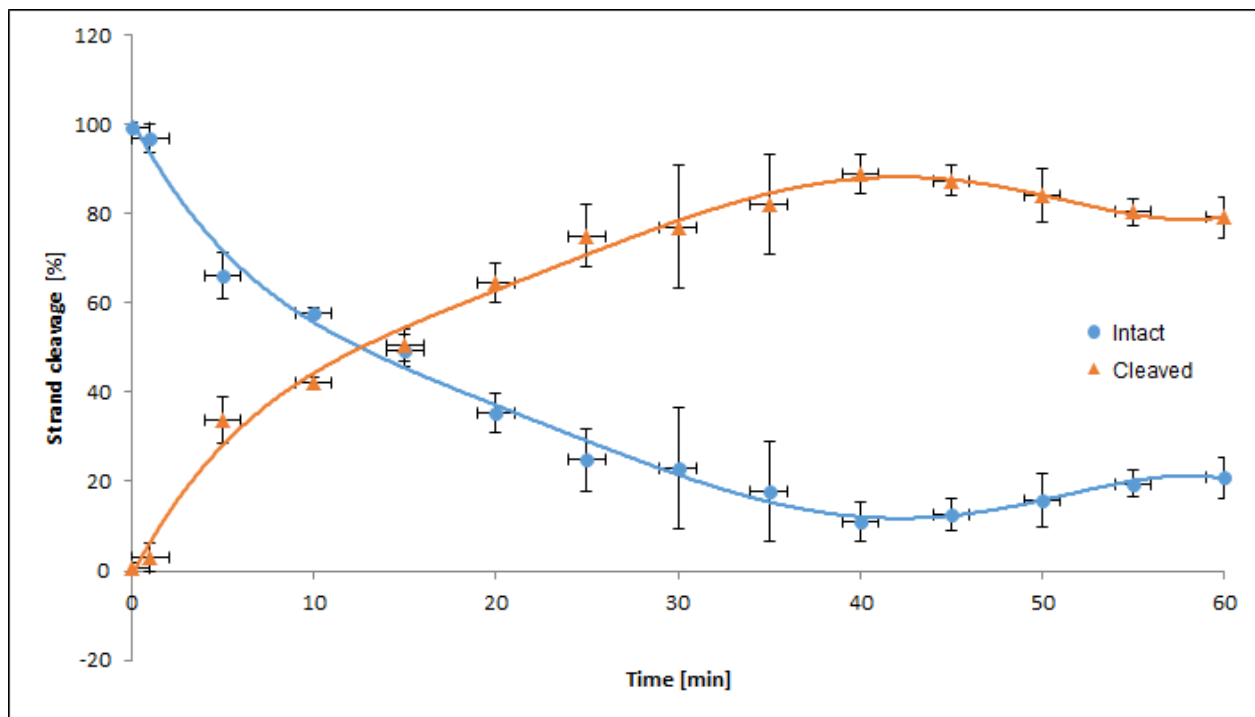

Figure S73. Cleavage assay of dU(+5)RcdA by 0.02U UDG and 0.5U hAPE1. The quantity loss of intact ssDNA (blue) and the quantity increase of SSB-DNA (orange). Error bars are shown.

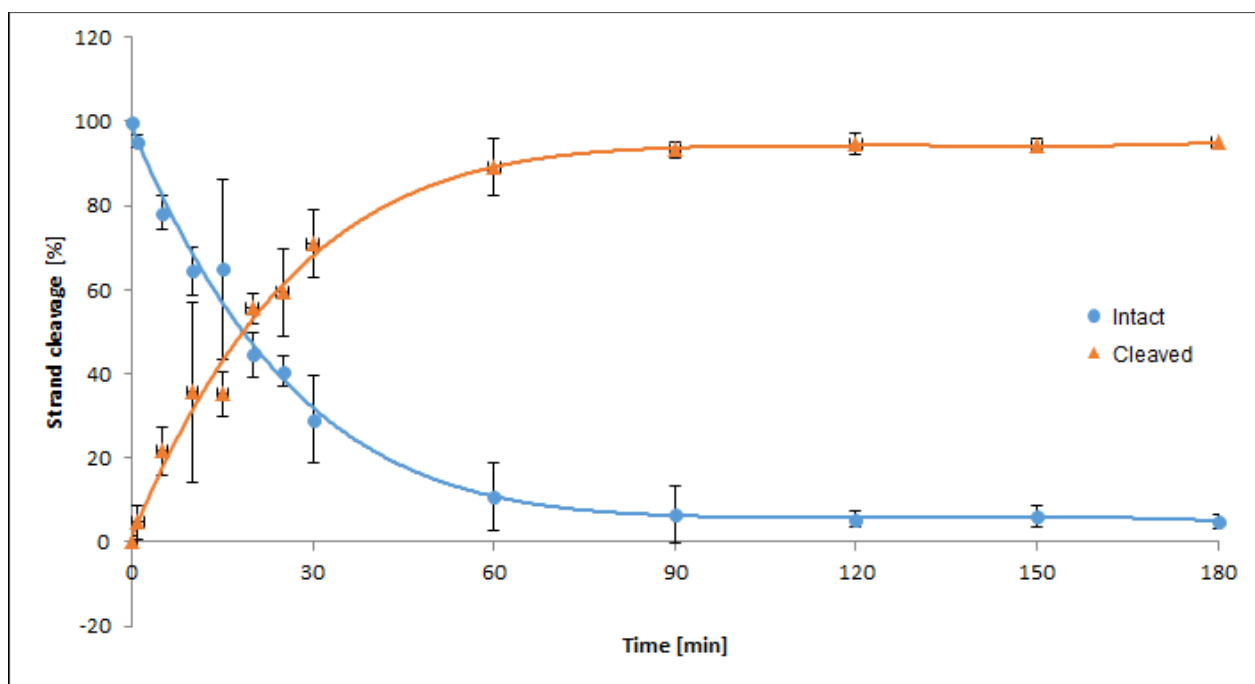

Figure S74. Cleavage assay of dU(+5)RcdA by 0.5U UDG and 0.02U hAPE1. The quantity loss of intact ssDNA (blue) and the quantity increase of SSB-DNA (orange). Error bars are shown.

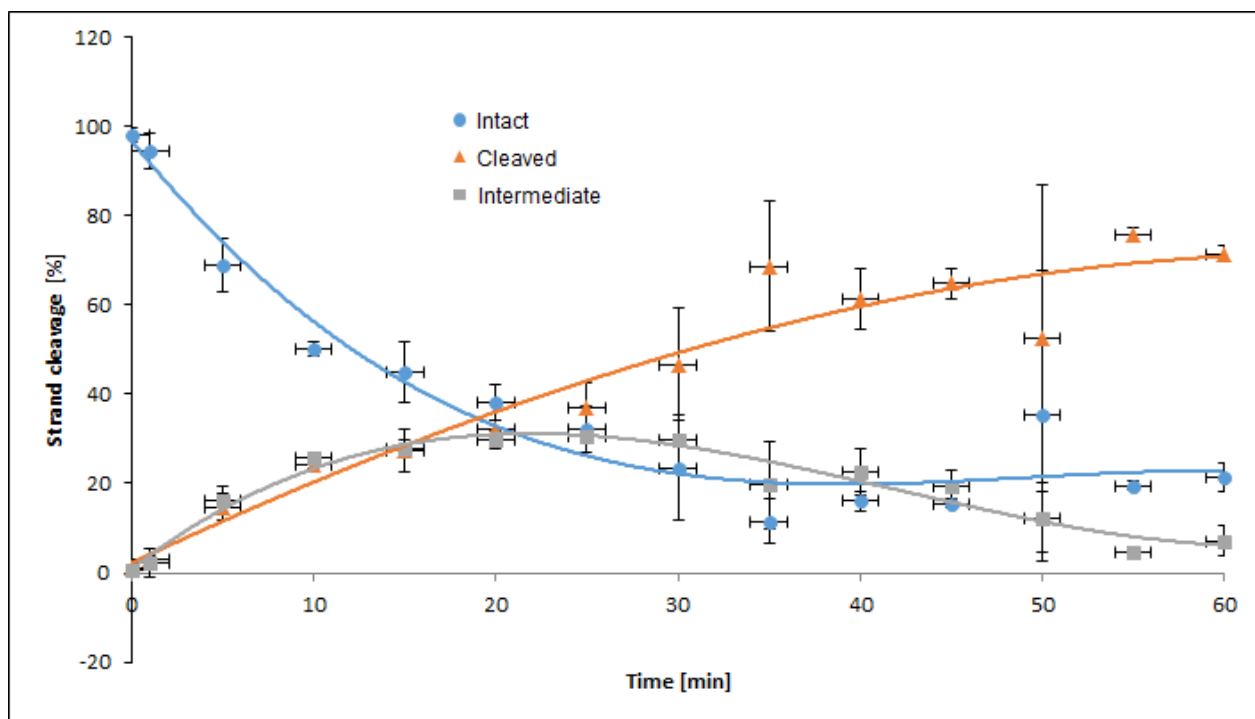

Figure S75. Cleavage assay of dU(-5)(+5)RcdA by 0.02U UDG and 0.5U hAPE1. The quantity loss of intact ssDNA (blue), the quantity increase of SSB-DNA (orange) and an intermediate oligo fragment (grey). Error bars are shown.

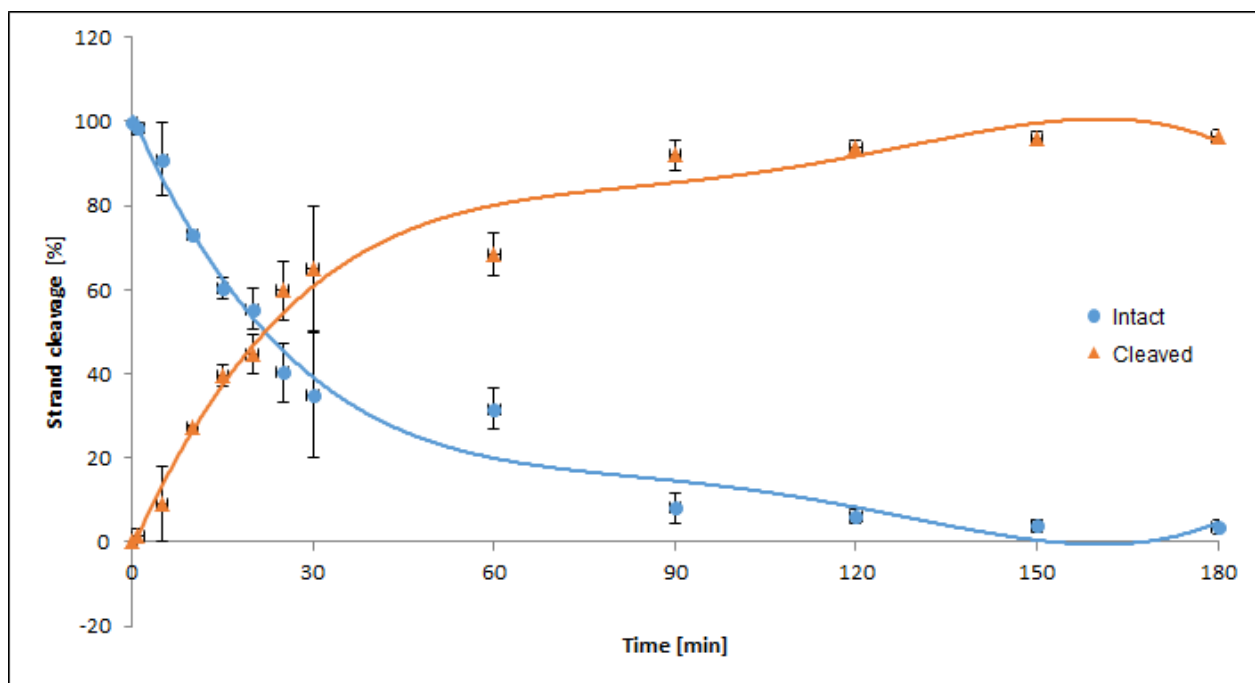

Figure S76. Cleavage assay of dU(-5)(+5)RcdA by 0.5U UDG and 0.02U hAPE1. The quantity loss of intact ssDNA (blue) and the quantity increase of SSB-DNA (orange). Error bars are shown.



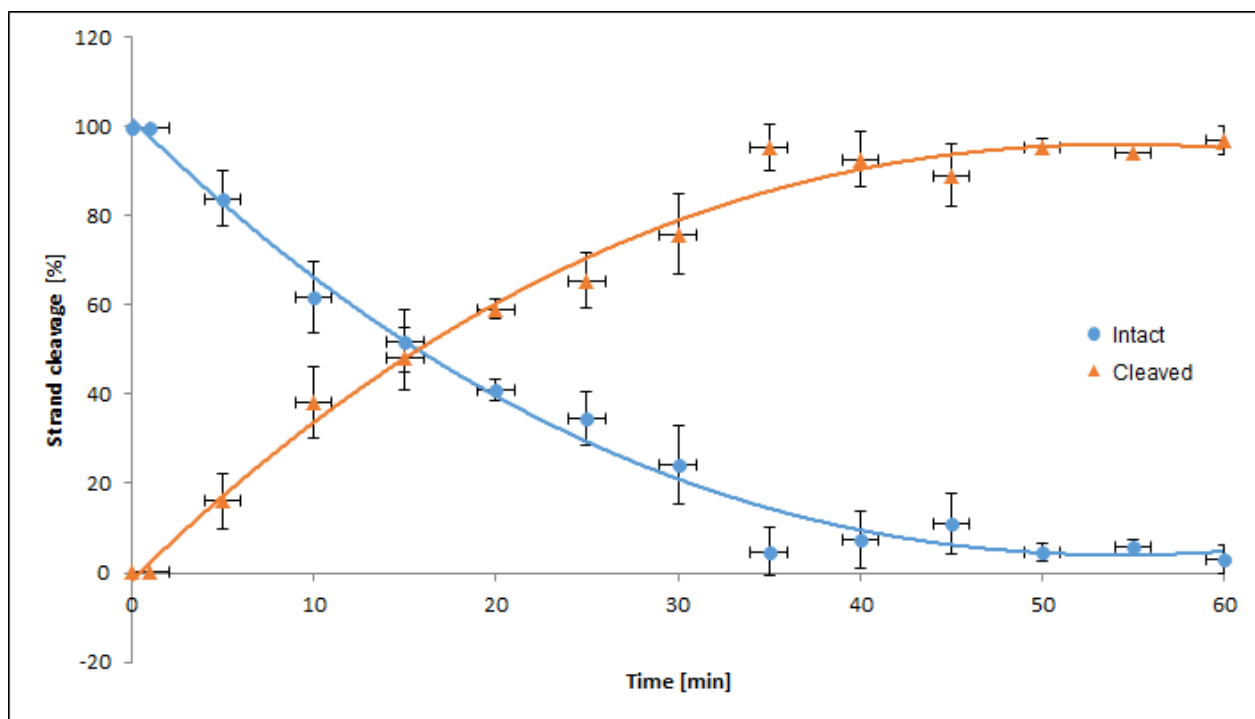

Figure S77. Cleavage assay of dU(-5)ScdG by 0.02U UDG and 0.5U hAPE1. The quantity loss of intact ssDNA (blue) and the quantity increase of SSB-DNA (orange). Error bars are shown.

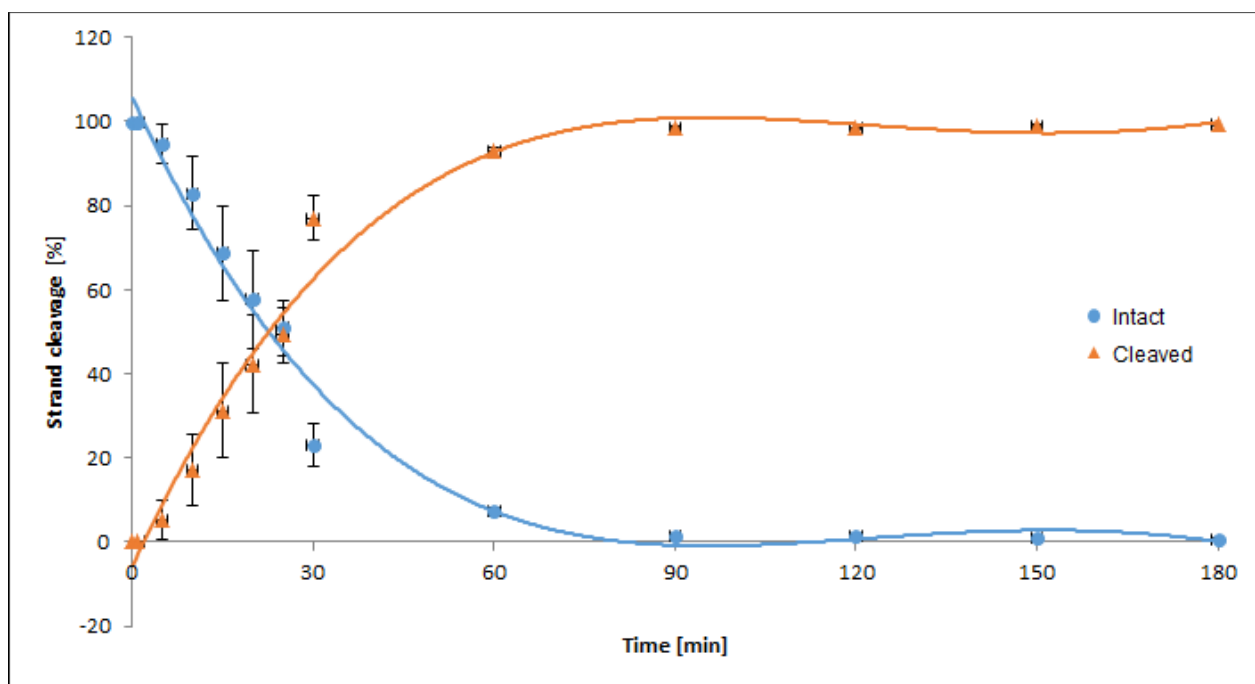

Figure S78. Cleavage assay of dU(-5)ScdG by 0.5U UDG and 0.02U hAPE1. The quantity loss of intact ssDNA (blue) and the quantity increase of SSB-DNA (orange). Error bars are shown.

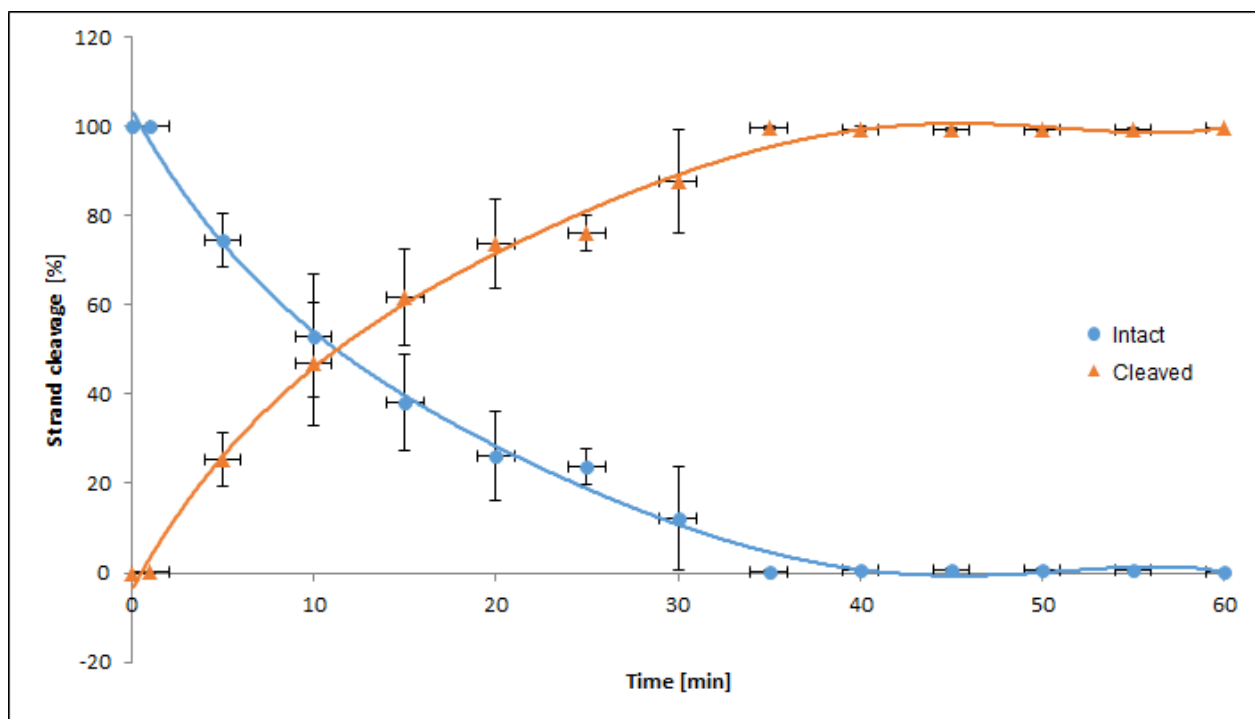

Figure S79. Cleavage assay of dU(+5)ScdG by 0.02U UDG and 0.5U hAPE1. The quantity loss of intact ssDNA (blue) and the quantity increase of SSB-DNA (orange). Error bars are shown.

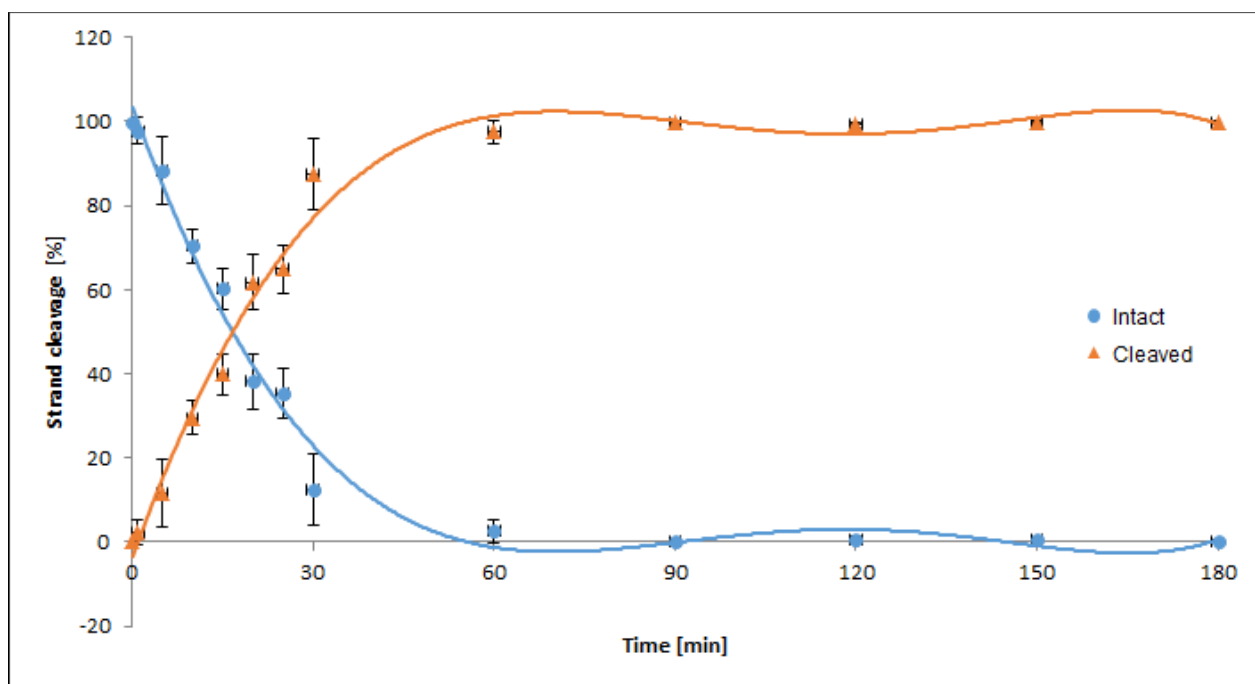

Figure S80. Cleavage assay of dU(+5)ScdG by 0.5U UDG and 0.02U hAPE1. The quantity loss of intact ssDNA (blue) and the quantity increase of SSB-DNA (orange). Error bars are shown.

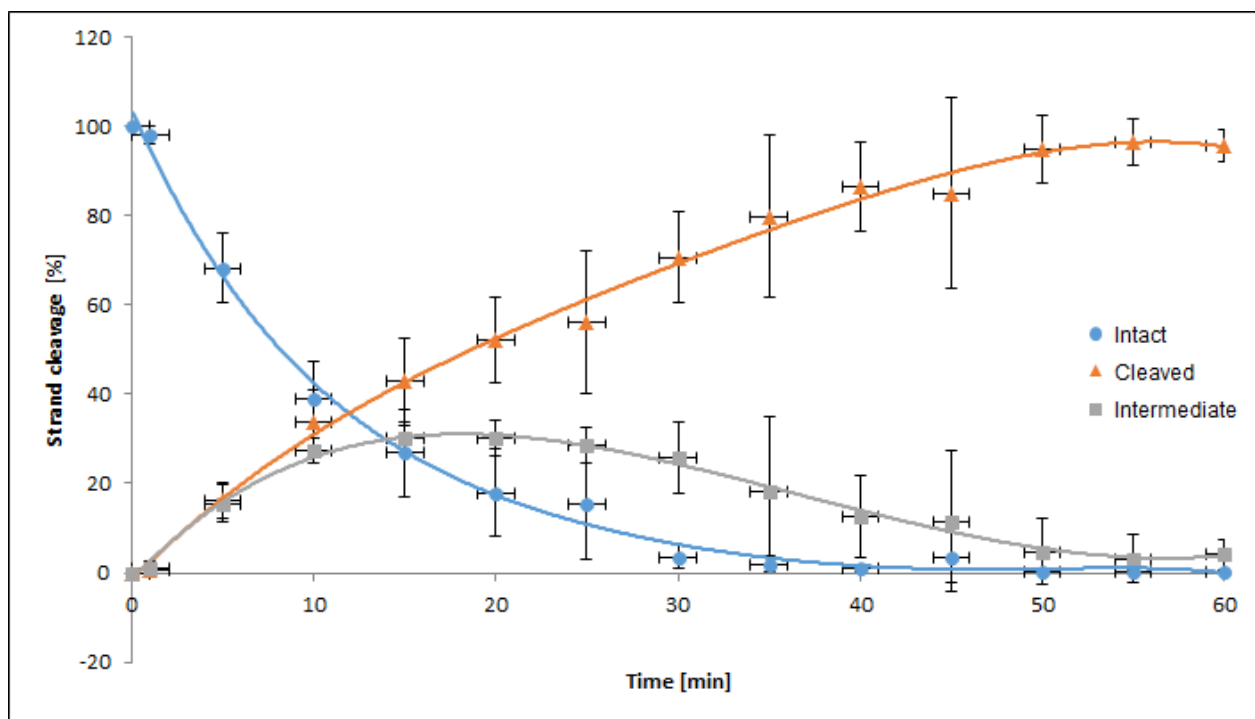

Figure S81. Cleavage assay of dU(-5)(+5)ScdG by 0.02U UDG and 0.5U hAPE1. The quantity loss of intact ssDNA (blue), the quantity increase of SSB-DNA (orange) and an intermediate oligo fragment (grey). Error bars are shown.

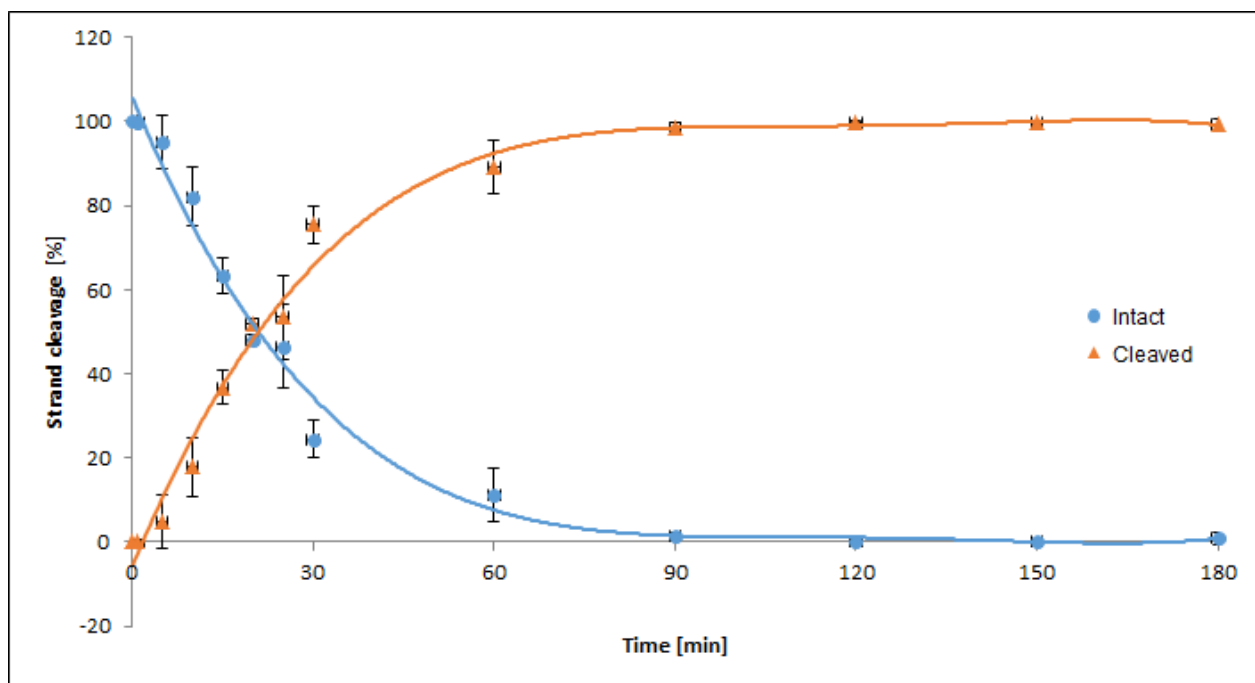

Figure S82. Cleavage assay of dU(-5)(+5)ScdG by 0.5U UDG and 0.02U hAPE1. The quantity loss of intact ssDNA (blue) and the quantity increase of SSB-DNA (orange). Error bars are shown.

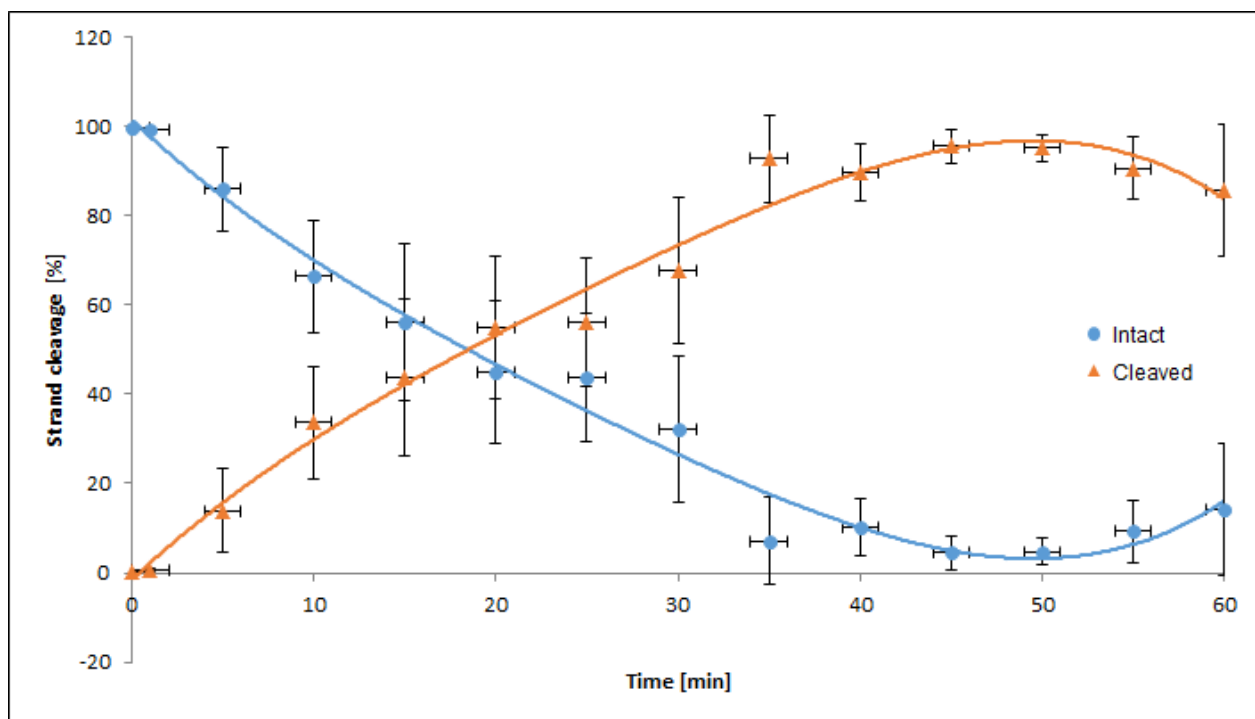

Figure S83. Cleavage assay of dU(-5)RcdG by 0.02U UDG and 0.5U hAPE1. The quantity loss of intact ssDNA (blue) and the quantity increase of SSB-DNA (orange). Error bars are shown.

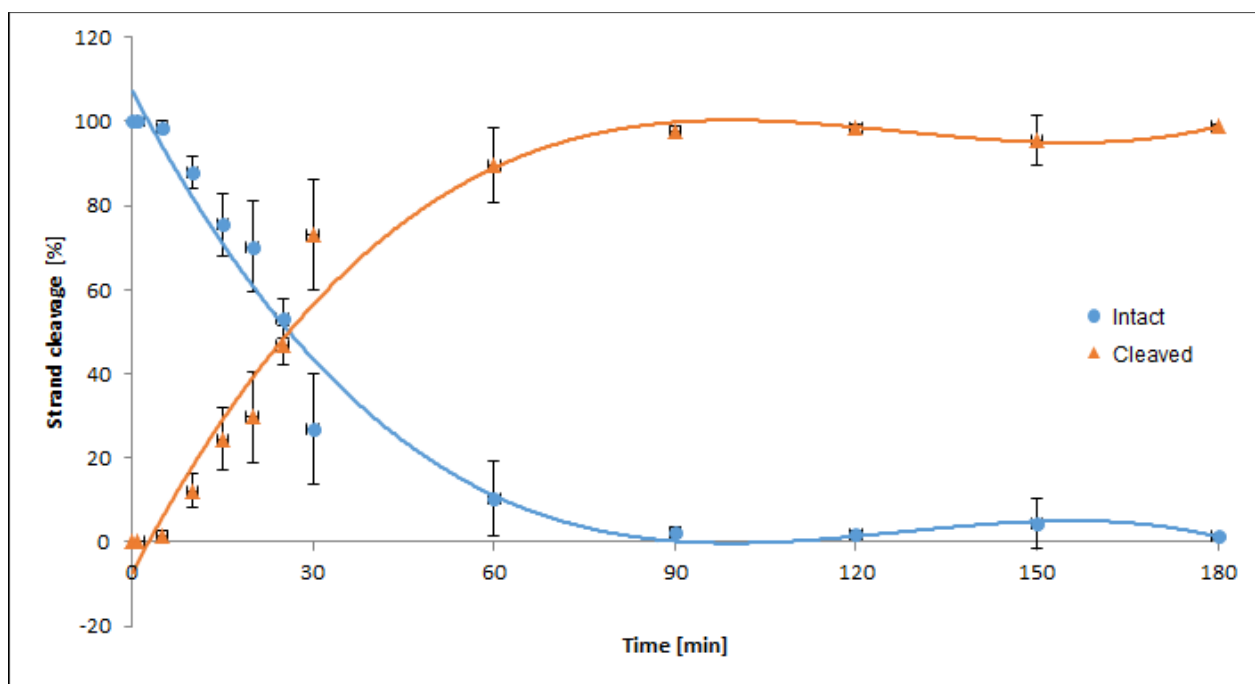

Figure S84. Cleavage assay of dU(-5) RcdG by 0.5U UDG and 0.02U hAPE1. The quantity loss of intact ssDNA (blue) and the quantity increase of SSB-DNA (orange). Error bars are shown.

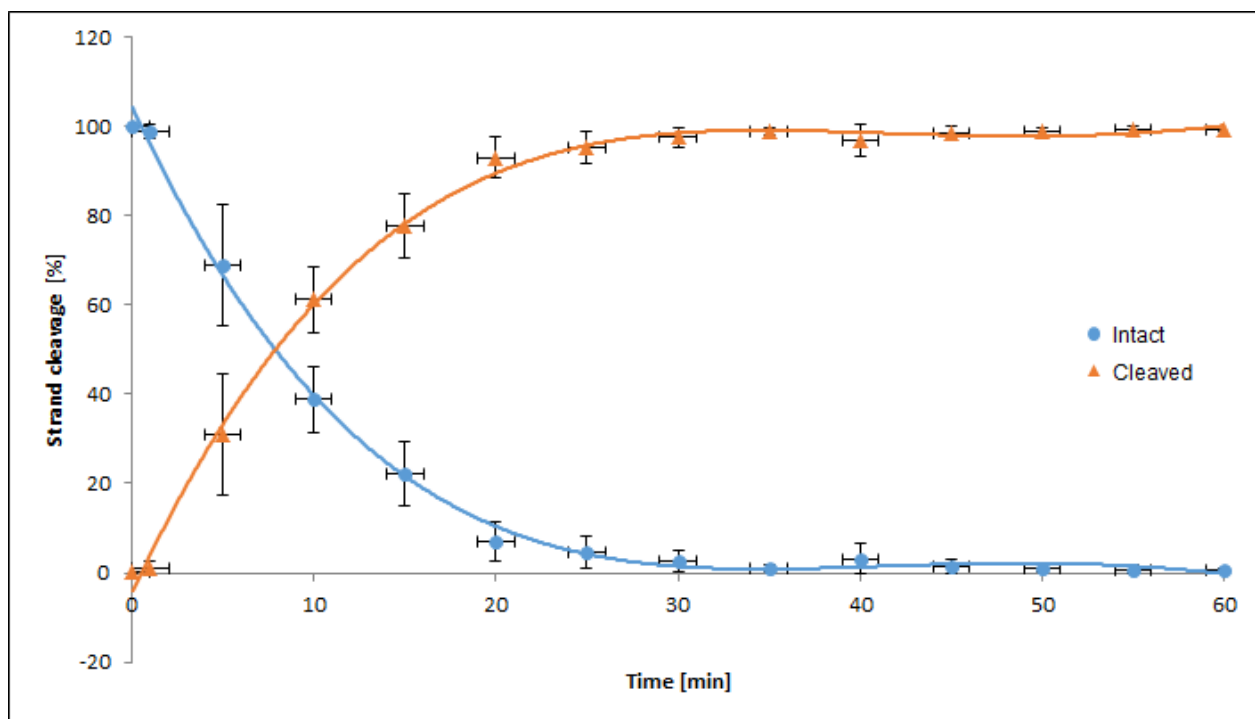

Figure S85. Cleavage assay of dU(+5) RcdG by 0.02U UDG and 0.5U hAPE1. The quantity loss of intact ssDNA (blue) and the quantity increase of SSB-DNA (orange). Error bars are shown.

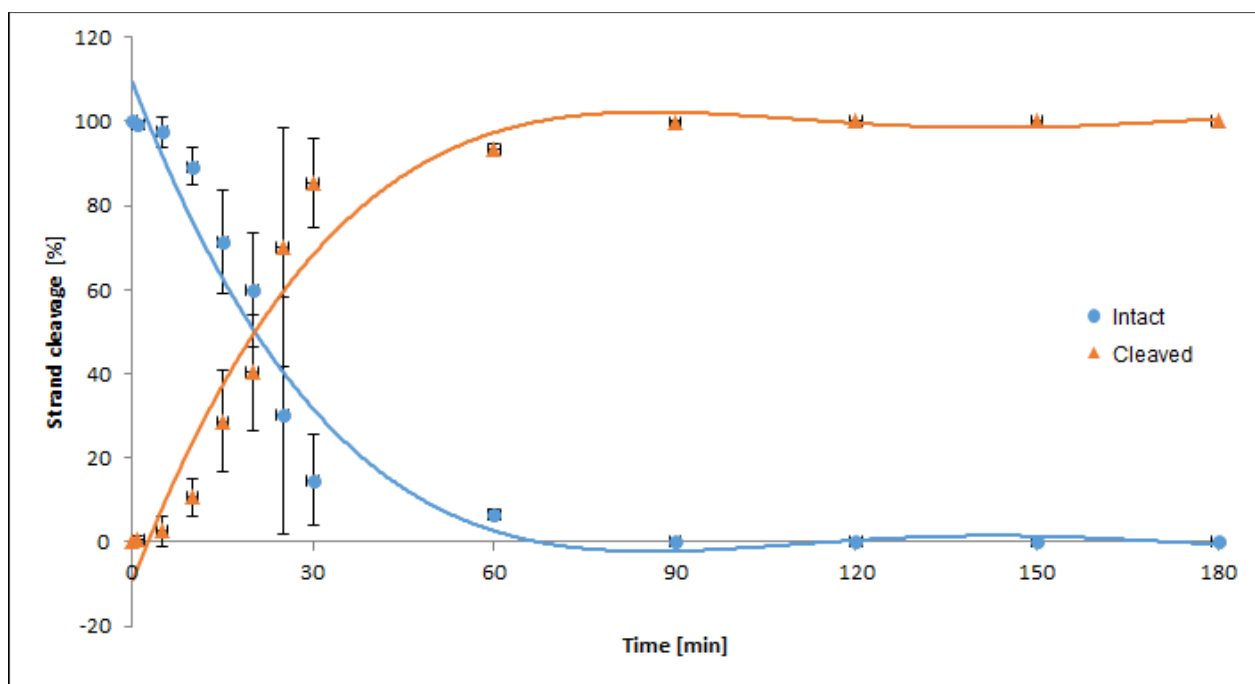

Figure S86. Cleavage assay of dU(+5) RcdG by 0.5U UDG and 0.02U hAPE1. The quantity loss of intact ssDNA (blue) and the quantity increase of SSB-DNA (orange). Error bars are shown.

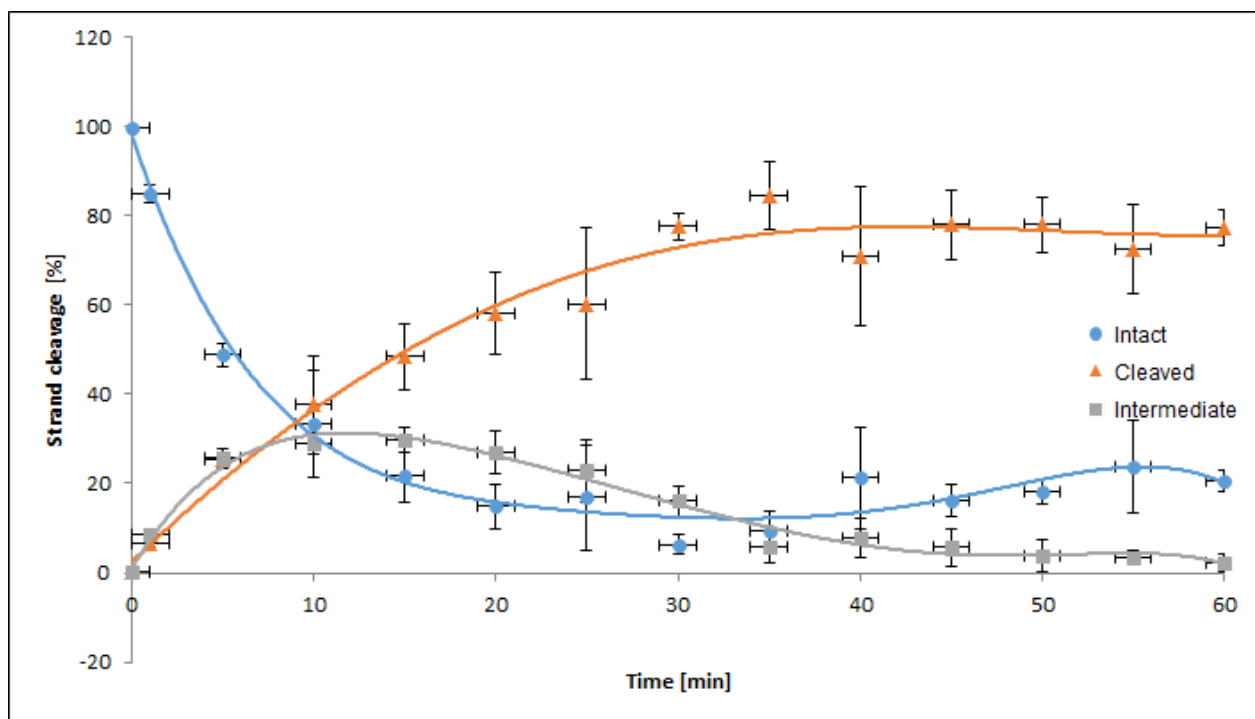

Figure S87. Cleavage assay of dU(-5)(+5) RcdG by 0.02U UDG and 0.5U hAPE1. The quantity loss of intact ssDNA (blue), the quantity increase of SSB-DNA (orange) and an intermediate oligo fragment (grey). Error bars are shown.

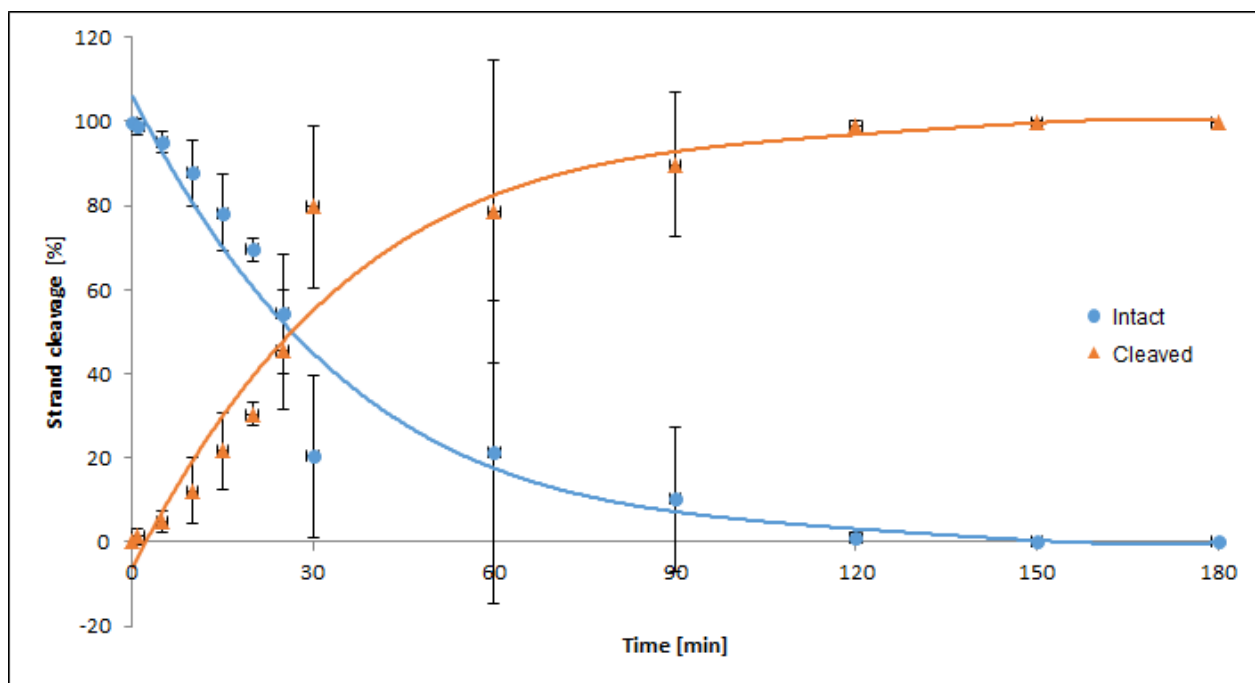

Figure S88. Cleavage assay of dU(-5)(+5) RcdG by 0.5U UDG and 0.02U hAPE1. The quantity loss of intact ssDNA (blue) and the quantity increase of SSB-DNA (orange). Error bars are shown.

**Table S2. Raw numerical data of UDG cleavage assays obtained from Quantity One software.**

| Oligo                           | Time [min] | 1                          | 2      | 3     | Avg   | SD    | 1                  | 2      | 3     | Avg   | SD    | 1                         | 2     | 3     | Avg   | SD    |
|---------------------------------|------------|----------------------------|--------|-------|-------|-------|--------------------|--------|-------|-------|-------|---------------------------|-------|-------|-------|-------|
|                                 |            | Intact oligonucleotide [%] |        |       |       |       | Cleaved strand [%] |        |       |       |       | Intermediate fragment [%] |       |       |       |       |
| Native control oligonucleotides |            |                            |        |       |       |       |                    |        |       |       |       |                           |       |       |       |       |
| dU0                             | 0          | 100,00                     | 100,00 | 99,93 | 99,98 | 0,04  | 0,00               | 0,00   | 0,07  | 0,02  | 0,04  |                           |       |       |       |       |
|                                 | 1          | 100,00                     | 99,75  | 99,69 | 99,81 | 0,17  | 0,00               | 0,25   | 0,31  | 0,19  | 0,17  |                           |       |       |       |       |
|                                 | 5          | 95,16                      | 80,34  | 74,26 | 83,25 | 10,75 | 4,84               | 19,66  | 25,74 | 16,75 | 10,75 |                           |       |       |       |       |
|                                 | 10         | 77,13                      | 67,90  | 62,99 | 69,34 | 7,18  | 22,87              | 32,10  | 37,01 | 30,66 | 7,18  |                           |       |       |       |       |
|                                 | 15         | 66,07                      | 53,91  | 49,78 | 56,59 | 8,47  | 33,93              | 46,09  | 50,22 | 43,41 | 8,47  |                           |       |       |       |       |
|                                 | 20         | 59,68                      | 46,89  | 42,35 | 49,64 | 8,99  | 40,32              | 53,11  | 57,65 | 50,36 | 8,99  |                           |       |       |       |       |
|                                 | 25         | 60,31                      | 36,45  | 27,19 | 41,32 | 17,09 | 39,69              | 63,55  | 72,81 | 58,68 | 17,09 |                           |       |       |       |       |
|                                 | 30         | 47,44                      | 28,22  | 23,99 | 33,22 | 12,50 | 52,56              | 71,78  | 76,01 | 66,78 | 12,50 |                           |       |       |       |       |
|                                 | 35         | 8,89                       | 1,95   | 1,14  | 3,99  | 4,26  | 91,11              | 98,05  | 98,86 | 96,01 | 4,26  |                           |       |       |       |       |
|                                 | 40         | 1,96                       | 1,11   | 4,85  | 2,64  | 1,96  | 98,04              | 98,89  | 95,15 | 97,36 | 1,96  |                           |       |       |       |       |
|                                 | 45         | 2,43                       | 1,91   | 2,91  | 2,41  | 0,50  | 97,57              | 98,09  | 97,09 | 97,59 | 0,50  |                           |       |       |       |       |
|                                 | 50         | 1,77                       | 0,35   | 1,59  | 1,24  | 0,78  | 98,23              | 99,65  | 98,41 | 98,76 | 0,78  |                           |       |       |       |       |
|                                 | 55         | 5,60                       | 0,00   | 1,10  | 2,23  | 2,97  | 94,40              | 100,00 | 98,90 | 97,77 | 2,97  |                           |       |       |       |       |
|                                 | 60         | 2,78                       | 0,16   | 0,81  | 1,25  | 1,37  | 97,22              | 99,84  | 99,19 | 98,75 | 1,37  |                           |       |       |       |       |
| dU(-5)<br>(+5)dA                | 0          | 100,00                     | 99,78  | 99,75 | 99,84 | 0,14  | 0,00               | 0,22   | 0,25  | 0,16  | 0,14  | 0,00                      | 0,00  | 0,00  | 0,00  | 0,00  |
|                                 | 1          | 99,21                      | 97,65  | 95,76 | 97,54 | 1,73  | 0,40               | 1,17   | 1,92  | 1,16  | 0,76  | 0,39                      | 1,18  | 2,32  | 1,30  | 0,97  |
|                                 | 5          | 65,08                      | 51,87  | 64,52 | 60,49 | 7,47  | 11,82              | 19,59  | 14,02 | 15,15 | 4,01  | 23,11                     | 28,54 | 21,46 | 24,37 | 3,70  |
|                                 | 10         | 47,80                      | 46,66  | 34,77 | 43,08 | 7,22  | 21,53              | 23,94  | 30,89 | 25,45 | 4,86  | 30,67                     | 29,40 | 34,34 | 31,47 | 2,57  |
|                                 | 15         | 41,20                      | 26,99  | 15,87 | 28,02 | 12,70 | 25,90              | 36,84  | 46,44 | 36,39 | 10,28 | 32,90                     | 36,18 | 37,70 | 35,59 | 2,45  |
|                                 | 20         | 21,33                      | 13,86  | 2,91  | 12,70 | 9,26  | 40,85              | 46,75  | 64,31 | 50,64 | 12,20 | 37,82                     | 39,38 | 32,78 | 36,66 | 3,45  |
|                                 | 25         | 7,08                       | 9,90   | 2,39  | 6,46  | 3,79  | 54,49              | 50,38  | 65,95 | 56,94 | 8,07  | 38,43                     | 39,72 | 31,66 | 36,60 | 4,33  |
|                                 | 30         | 7,16                       | 5,19   | 1,60  | 4,65  | 2,82  | 54,68              | 57,38  | 75,59 | 62,55 | 11,37 | 38,16                     | 37,43 | 22,81 | 32,80 | 8,66  |
|                                 | 35         | 1,84                       | 3,39   | 1,49  | 2,24  | 1,01  | 94,17              | 63,76  | 96,88 | 84,94 | 18,39 | 3,99                      | 32,85 | 1,64  | 12,82 | 17,38 |
|                                 | 40         | 2,03                       | 4,22   | 0,67  | 2,31  | 1,79  | 89,76              | 61,27  | 98,66 | 83,23 | 19,53 | 8,21                      | 34,51 | 0,67  | 14,46 | 17,77 |
|                                 | 45         | 1,73                       | 4,80   | 1,06  | 2,53  | 2,00  | 89,75              | 61,32  | 94,10 | 81,72 | 17,80 | 8,51                      | 33,88 | 4,84  | 15,74 | 15,81 |
|                                 | 50         | 2,65                       | 3,28   | 0,70  | 2,21  | 1,35  | 85,87              | 94,44  | 97,98 | 92,76 | 6,22  | 11,48                     | 2,28  | 1,33  | 5,03  | 5,61  |
|                                 | 55         | 14,17                      | 2,15   | 0,68  | 5,67  | 7,40  | 46,93              | 77,23  | 99,22 | 74,46 | 26,25 | 38,89                     | 20,62 | 0,10  | 19,87 | 19,40 |
|                                 | 60         | 1,02                       | 1,91   | 0,37  | 1,10  | 0,77  | 92,92              | 76,24  | 99,13 | 89,43 | 11,84 | 6,06                      | 21,85 | 0,50  | 9,47  | 11,08 |
| ScdA                            |            |                            |        |       |       |       |                    |        |       |       |       |                           |       |       |       |       |
| dU(-5)ScdA                      | 0          | 99,99                      | 99,99  | 99,77 | 99,92 | 0,12  | 0,01               | 0,01   | 0,23  | 0,08  | 0,12  |                           |       |       |       |       |
|                                 | 1          | 99,96                      | 100,00 | 99,70 | 99,88 | 0,16  | 0,04               | 0,00   | 0,30  | 0,12  | 0,16  |                           |       |       |       |       |
|                                 | 5          | 99,69                      | 99,91  | 88,48 | 96,03 | 6,54  | 0,31               | 0,09   | 11,52 | 3,97  | 6,54  |                           |       |       |       |       |
|                                 | 10         | 95,54                      | 82,16  | 64,86 | 80,85 | 15,38 | 4,46               | 17,84  | 35,14 | 19,15 | 15,38 |                           |       |       |       |       |
|                                 | 15         | 87,94                      | 75,66  | 57,04 | 73,54 | 15,56 | 12,06              | 24,34  | 42,96 | 26,46 | 15,56 |                           |       |       |       |       |
|                                 | 20         | 70,53                      | 59,95  | 33,00 | 54,49 | 19,35 | 29,47              | 40,05  | 67,00 | 45,51 | 19,35 |                           |       |       |       |       |
|                                 | 25         | 60,73                      | 41,06  | 20,77 | 40,85 | 19,98 | 39,27              | 58,94  | 79,23 | 59,15 | 19,98 |                           |       |       |       |       |
|                                 | 30         | 56,82                      | 88,05  | 24,24 | 56,37 | 31,91 | 43,18              | 11,95  | 75,76 | 43,63 | 31,91 |                           |       |       |       |       |

|                    |    |        |        |        |       |       |       |       |       |       |       |       |       |       |       |      |
|--------------------|----|--------|--------|--------|-------|-------|-------|-------|-------|-------|-------|-------|-------|-------|-------|------|
|                    | 35 | 3,16   | 14,25  | 30,85  | 16,09 | 13,94 | 96,84 | 85,75 | 69,15 | 83,91 | 13,94 |       |       |       |       |      |
|                    | 40 | 20,20  | 25,36  | 3,67   | 16,41 | 11,33 | 79,80 | 74,64 | 96,33 | 83,59 | 11,33 |       |       |       |       |      |
|                    | 45 | 22,61  | 3,08   | 1,97   | 9,22  | 11,61 | 77,39 | 96,92 | 98,03 | 90,78 | 11,61 |       |       |       |       |      |
|                    | 50 | 14,48  | 5,66   | 5,26   | 8,47  | 5,21  | 85,52 | 94,34 | 94,74 | 91,53 | 5,21  |       |       |       |       |      |
|                    | 55 | 15,14  | 6,05   | 5,41   | 8,87  | 5,44  | 84,86 | 93,95 | 94,59 | 91,13 | 5,44  |       |       |       |       |      |
|                    | 60 | 11,03  | 14,64  | 4,79   | 10,16 | 4,99  | 88,97 | 85,36 | 95,21 | 89,84 | 4,99  |       |       |       |       |      |
| dU(+5)ScdA         | 0  | 99,53  | 99,84  | 100,00 | 99,79 | 0,24  | 0,47  | 0,16  | 0,00  | 0,21  | 0,24  |       |       |       |       |      |
|                    | 1  | 97,73  | 98,36  | 99,04  | 98,37 | 0,66  | 2,27  | 1,64  | 0,96  | 1,63  | 0,66  |       |       |       |       |      |
|                    | 5  | 47,91  | 44,18  | 24,11  | 38,73 | 12,80 | 52,09 | 55,82 | 75,89 | 61,27 | 12,80 |       |       |       |       |      |
|                    | 10 | 27,41  | 25,20  | 13,99  | 22,20 | 7,19  | 72,59 | 74,80 | 86,01 | 77,80 | 7,19  |       |       |       |       |      |
|                    | 15 | 15,83  | 8,11   | 3,97   | 9,30  | 6,02  | 84,17 | 91,89 | 96,03 | 90,70 | 6,02  |       |       |       |       |      |
|                    | 20 | 7,72   | 7,11   | 3,69   | 6,17  | 2,17  | 92,28 | 92,89 | 96,31 | 93,83 | 2,17  |       |       |       |       |      |
|                    | 25 | 8,46   | 4,89   | 2,50   | 5,28  | 3,00  | 91,54 | 95,11 | 97,50 | 94,72 | 3,00  |       |       |       |       |      |
|                    | 30 | 5,33   | 2,83   | 11,76  | 6,64  | 4,61  | 94,67 | 97,17 | 88,24 | 93,36 | 4,61  |       |       |       |       |      |
|                    | 35 | 4,06   | 1,98   | 2,30   | 2,78  | 1,12  | 95,94 | 98,02 | 97,70 | 97,22 | 1,12  |       |       |       |       |      |
|                    | 40 | 4,00   | 1,89   | 1,86   | 2,58  | 1,23  | 96,00 | 98,11 | 98,14 | 97,42 | 1,23  |       |       |       |       |      |
|                    | 45 | 3,16   | 2,00   | 2,53   | 2,56  | 0,58  | 96,84 | 98,00 | 97,47 | 97,44 | 0,58  |       |       |       |       |      |
|                    | 50 | 3,10   | 2,12   | 2,39   | 2,54  | 0,51  | 96,90 | 97,88 | 97,61 | 97,46 | 0,51  |       |       |       |       |      |
|                    | 55 | 3,29   | 1,59   | 2,30   | 2,39  | 0,86  | 96,71 | 98,41 | 97,70 | 97,61 | 0,86  |       |       |       |       |      |
|                    | 60 | 3,95   | 1,82   | 1,78   | 2,52  | 1,24  | 96,05 | 98,18 | 98,22 | 97,48 | 1,24  |       |       |       |       |      |
| dU(-5)<br>(+5)ScdA | 0  | 99,88  | 99,35  | 99,69  | 99,64 | 0,27  | 0,10  | 0,00  | 0,18  | 0,10  | 0,09  | 0,02  | 0,65  | 0,13  | 0,26  | 0,34 |
|                    | 1  | 96,43  | 94,16  | 92,95  | 94,51 | 1,77  | 1,62  | 1,70  | 2,81  | 2,04  | 0,66  | 1,95  | 4,14  | 4,25  | 3,44  | 1,30 |
|                    | 5  | 44,86  | 32,84  | 33,11  | 36,93 | 6,86  | 27,72 | 32,83 | 29,42 | 29,99 | 2,60  | 27,42 | 34,34 | 37,47 | 33,08 | 5,14 |
|                    | 10 | 35,54  | 30,60  | 33,36  | 33,17 | 2,47  | 34,32 | 34,69 | 29,55 | 32,85 | 2,87  | 30,14 | 34,71 | 37,09 | 33,98 | 3,53 |
|                    | 15 | 27,50  | 12,45  | 7,33   | 15,76 | 10,48 | 39,94 | 45,31 | 58,95 | 48,07 | 9,80  | 32,56 | 42,24 | 33,72 | 36,17 | 5,29 |
|                    | 20 | 5,90   | 4,75   | 5,47   | 5,38  | 0,58  | 60,58 | 58,38 | 60,13 | 59,70 | 1,16  | 33,52 | 36,87 | 34,40 | 34,93 | 1,74 |
|                    | 25 | 4,81   | 3,37   | 3,21   | 3,80  | 0,88  | 62,26 | 64,55 | 69,85 | 65,56 | 3,89  | 32,93 | 32,08 | 26,94 | 30,65 | 3,24 |
|                    | 30 | 4,10   | 2,11   | 1,66   | 2,63  | 1,30  | 67,78 | 79,07 | 76,32 | 74,39 | 5,89  | 28,12 | 18,82 | 22,02 | 22,98 | 4,73 |
|                    | 35 | 1,61   | 2,04   | 1,23   | 1,63  | 0,40  | 97,45 | 95,79 | 97,77 | 97,00 | 1,06  | 0,94  | 2,17  | 0,99  | 1,36  | 0,69 |
|                    | 40 | 1,43   | 1,79   | 1,08   | 1,43  | 0,35  | 97,93 | 88,60 | 98,24 | 94,92 | 5,48  | 0,63  | 9,62  | 0,67  | 3,64  | 5,17 |
|                    | 45 | 1,62   | 1,19   | 0,95   | 1,26  | 0,34  | 94,99 | 95,51 | 98,23 | 96,24 | 1,74  | 3,39  | 3,30  | 0,82  | 2,50  | 1,46 |
|                    | 50 | 2,32   | 1,10   | 0,97   | 1,46  | 0,75  | 92,31 | 97,55 | 98,11 | 95,99 | 3,20  | 5,37  | 1,35  | 0,92  | 2,54  | 2,45 |
|                    | 55 | 11,07  | 1,42   | 0,97   | 4,49  | 5,70  | 73,60 | 96,71 | 97,02 | 89,11 | 13,43 | 15,33 | 1,87  | 2,02  | 6,40  | 7,73 |
|                    | 60 | 1,75   | 0,86   | 0,58   | 1,06  | 0,61  | 97,31 | 97,68 | 98,47 | 97,82 | 0,59  | 0,94  | 1,47  | 0,95  | 1,12  | 0,30 |
| RcdA               |    |        |        |        |       |       |       |       |       |       |       |       |       |       |       |      |
| dU(-5)RcdA         | 0  | 100,00 | 100,00 | 99,97  | 99,99 | 0,02  | 0,00  | 0,00  | 0,03  | 0,01  | 0,02  |       |       |       |       |      |
|                    | 1  | 99,93  | 99,91  | 98,58  | 99,47 | 0,77  | 0,07  | 0,09  | 1,42  | 0,53  | 0,77  |       |       |       |       |      |
|                    | 5  | 93,37  | 95,63  | 53,90  | 80,97 | 23,47 | 6,63  | 4,37  | 46,10 | 19,03 | 23,47 |       |       |       |       |      |
|                    | 10 | 63,87  | 60,52  | 40,45  | 54,95 | 12,67 | 36,13 | 39,48 | 59,55 | 45,05 | 12,67 |       |       |       |       |      |
|                    | 15 | 45,57  | 42,05  | 16,38  | 34,67 | 15,93 | 54,43 | 57,95 | 83,62 | 65,33 | 15,93 |       |       |       |       |      |
|                    | 20 | 45,60  | 32,78  | 6,76   | 28,38 | 19,79 | 54,40 | 67,22 | 93,24 | 71,62 | 19,79 |       |       |       |       |      |



|                    |    |       |        |        |       |       |       |       |       |       |       |       |       |       |       |      |
|--------------------|----|-------|--------|--------|-------|-------|-------|-------|-------|-------|-------|-------|-------|-------|-------|------|
|                    | 25 | 15,70 | 25,84  | 5,33   | 15,62 | 10,26 | 84,30 | 74,16 | 94,67 | 84,38 | 10,26 |       |       |       |       |      |
|                    | 30 | 7,32  | 16,19  | 6,60   | 10,04 | 5,34  | 92,68 | 83,81 | 93,40 | 89,96 | 5,34  |       |       |       |       |      |
|                    | 35 | 4,37  | 2,76   | 1,09   | 2,74  | 1,64  | 95,63 | 97,24 | 98,91 | 97,26 | 1,64  |       |       |       |       |      |
|                    | 40 | 4,31  | 2,10   | 0,75   | 2,39  | 1,80  | 95,69 | 97,90 | 99,25 | 97,61 | 1,80  |       |       |       |       |      |
|                    | 45 | 3,19  | 1,48   | 1,60   | 2,09  | 0,95  | 96,81 | 98,52 | 98,40 | 97,91 | 0,95  |       |       |       |       |      |
|                    | 50 | 0,66  | 0,20   | 2,23   | 1,03  | 1,06  | 99,34 | 99,80 | 97,77 | 98,97 | 1,06  |       |       |       |       |      |
|                    | 55 | 8,25  | 0,23   | 0,30   | 2,93  | 4,61  | 91,75 | 99,77 | 99,70 | 97,07 | 4,61  |       |       |       |       |      |
|                    | 60 | 0,40  | 0,54   | 1,40   | 0,78  | 0,54  | 99,60 | 99,46 | 98,60 | 99,22 | 0,54  |       |       |       |       |      |
| dU(+5)RcdA         | 0  | 98,00 | 100,00 | 99,96  | 99,32 | 1,14  | 2,00  | 0,00  | 0,04  | 0,68  | 1,14  |       |       |       |       |      |
|                    | 1  | 93,74 | 100,00 | 97,15  | 96,96 | 3,13  | 6,26  | 0,00  | 2,85  | 3,04  | 3,13  |       |       |       |       |      |
|                    | 5  | 60,28 | 69,96  | 68,17  | 66,14 | 5,15  | 39,72 | 30,04 | 31,83 | 33,86 | 5,15  |       |       |       |       |      |
|                    | 10 | 58,21 | 56,61  | 58,63  | 57,82 | 1,07  | 41,79 | 43,39 | 41,37 | 42,18 | 1,07  |       |       |       |       |      |
|                    | 15 | 47,38 | 53,60  | 47,52  | 49,50 | 3,55  | 52,62 | 46,40 | 52,48 | 50,50 | 3,55  |       |       |       |       |      |
|                    | 20 | 37,08 | 38,67  | 30,48  | 35,41 | 4,34  | 62,92 | 61,33 | 69,52 | 64,59 | 4,34  |       |       |       |       |      |
|                    | 25 | 29,29 | 16,94  | 28,51  | 24,91 | 6,92  | 70,71 | 83,06 | 71,49 | 75,09 | 6,92  |       |       |       |       |      |
|                    | 30 | 31,07 | 30,72  | 7,10   | 22,96 | 13,74 | 68,93 | 69,28 | 92,90 | 77,04 | 13,74 |       |       |       |       |      |
|                    | 35 | 18,54 | 28,67  | 6,11   | 17,78 | 11,30 | 81,46 | 71,33 | 93,89 | 82,22 | 11,30 |       |       |       |       |      |
|                    | 40 | 15,70 | 9,85   | 7,17   | 10,91 | 4,36  | 84,30 | 90,15 | 92,83 | 89,09 | 4,36  |       |       |       |       |      |
|                    | 45 | 16,57 | 10,67  | 10,43  | 12,56 | 3,48  | 83,43 | 89,33 | 89,57 | 87,44 | 3,48  |       |       |       |       |      |
|                    | 50 | 16,43 | 21,69  | 9,58   | 15,90 | 6,07  | 83,57 | 78,31 | 90,42 | 84,10 | 6,07  |       |       |       |       |      |
|                    | 55 | 19,99 | 22,33  | 16,44  | 19,59 | 2,97  | 80,01 | 77,67 | 83,56 | 80,41 | 2,97  |       |       |       |       |      |
|                    | 60 | 17,38 | 26,08  | 19,06  | 20,84 | 4,61  | 82,62 | 73,92 | 80,94 | 79,16 | 4,61  |       |       |       |       |      |
| dU(-5)<br>(+5)RcdA | 0  | 96,30 | 98,74  | 99,39  | 98,14 | 1,63  | 1,32  | 1,26  | 0,61  | 1,06  | 0,40  | 2,39  | 0,00  | 0,00  | 0,80  | 1,38 |
|                    | 1  | 90,05 | 96,04  | 97,61  | 94,57 | 3,99  | 3,95  | 3,18  | 2,39  | 3,17  | 0,78  | 6,00  | 0,77  | 0,00  | 2,26  | 3,26 |
|                    | 5  | 62,61 | 69,34  | 74,71  | 68,89 | 6,06  | 17,39 | 15,42 | 11,34 | 14,72 | 3,09  | 19,99 | 15,25 | 13,95 | 16,40 | 3,18 |
|                    | 10 | 51,42 | 50,37  | 48,27  | 50,02 | 1,60  | 23,19 | 24,24 | 25,08 | 24,17 | 0,95  | 25,38 | 25,39 | 26,65 | 25,81 | 0,73 |
|                    | 15 | 46,64 | 37,28  | 50,58  | 44,83 | 6,83  | 25,81 | 32,79 | 23,43 | 27,34 | 4,86  | 27,55 | 29,93 | 25,99 | 27,82 | 1,99 |
|                    | 20 | 38,20 | 42,14  | 34,23  | 38,19 | 3,96  | 31,09 | 30,18 | 34,70 | 31,99 | 2,39  | 30,71 | 27,68 | 31,07 | 29,82 | 1,87 |
|                    | 25 | 38,02 | 28,14  | 30,51  | 32,22 | 5,16  | 31,19 | 42,33 | 37,87 | 37,13 | 5,61  | 30,79 | 29,53 | 31,62 | 30,65 | 1,05 |
|                    | 30 | 37,01 | 16,83  | 16,79  | 23,55 | 11,66 | 32,06 | 55,08 | 53,09 | 46,75 | 12,75 | 30,92 | 28,08 | 30,12 | 29,71 | 1,46 |
|                    | 35 | 11,81 | 16,26  | 6,47   | 11,51 | 4,90  | 64,33 | 56,96 | 84,92 | 68,74 | 14,49 | 23,86 | 26,78 | 8,61  | 19,75 | 9,76 |
|                    | 40 | 15,19 | 18,51  | 14,51  | 16,07 | 2,14  | 59,12 | 56,14 | 68,96 | 61,41 | 6,71  | 25,70 | 25,35 | 16,52 | 22,52 | 5,20 |
|                    | 45 | 15,30 | 16,52  | 14,89  | 15,57 | 0,85  | 61,20 | 65,60 | 67,82 | 64,87 | 3,37  | 23,50 | 17,87 | 17,29 | 19,55 | 3,43 |
|                    | 50 | 20,33 | 72,72  | 12,86  | 35,30 | 32,62 | 59,59 | 15,05 | 82,73 | 52,46 | 34,39 | 20,08 | 12,23 | 4,42  | 12,24 | 7,83 |
|                    | 55 | 18,47 | 20,24  | 19,75  | 19,48 | 0,91  | 77,66 | 74,81 | 74,69 | 75,72 | 1,68  | 3,87  | 4,96  | 5,56  | 4,80  | 0,86 |
|                    | 60 | 18,91 | 20,22  | 24,97  | 21,36 | 3,19  | 70,21 | 73,77 | 70,65 | 71,54 | 1,94  | 10,88 | 6,02  | 4,38  | 7,09  | 3,38 |
| ScdG               |    |       |        |        |       |       |       |       |       |       |       |       |       |       |       |      |
| dU(-5)ScdG         | 0  | 99,67 | 100,00 | 100,00 | 99,89 | 0,19  | 0,33  | 0,00  | 0,00  | 0,11  | 0,19  |       |       |       |       |      |
|                    | 1  | 99,62 | 99,86  | 99,86  | 99,78 | 0,14  | 0,38  | 0,14  | 0,14  | 0,22  | 0,14  |       |       |       |       |      |
|                    | 5  | 90,11 | 83,76  | 77,97  | 83,95 | 6,07  | 9,89  | 16,24 | 22,03 | 16,05 | 6,07  |       |       |       |       |      |
|                    | 10 | 68,94 | 63,08  | 53,22  | 61,75 | 7,94  | 31,06 | 36,92 | 46,78 | 38,25 | 7,94  |       |       |       |       |      |

|                    |    |        |        |        |        |       |       |       |       |       |       |       |       |       |       |       |
|--------------------|----|--------|--------|--------|--------|-------|-------|-------|-------|-------|-------|-------|-------|-------|-------|-------|
|                    | 15 | 59,41  | 50,49  | 45,70  | 51,87  | 6,96  | 40,59 | 49,51 | 54,30 | 48,13 | 6,96  |       |       |       |       |       |
|                    | 20 | 43,19  | 40,98  | 38,52  | 40,90  | 2,33  | 56,81 | 59,02 | 61,48 | 59,10 | 2,33  |       |       |       |       |       |
|                    | 25 | 35,71  | 39,87  | 27,87  | 34,49  | 6,09  | 64,29 | 60,13 | 72,13 | 65,51 | 6,09  |       |       |       |       |       |
|                    | 30 | 27,86  | 30,42  | 13,96  | 24,08  | 8,86  | 72,14 | 69,58 | 86,04 | 75,92 | 8,86  |       |       |       |       |       |
|                    | 35 | 10,74  | 0,85   | 2,69   | 4,76   | 5,26  | 89,26 | 99,15 | 97,31 | 95,24 | 5,26  |       |       |       |       |       |
|                    | 40 | 11,84  | 0,26   | 10,09  | 7,39   | 6,24  | 88,16 | 99,74 | 89,91 | 92,61 | 6,24  |       |       |       |       |       |
|                    | 45 | 17,18  | 3,47   | 12,34  | 11,00  | 6,95  | 82,82 | 96,53 | 87,66 | 89,00 | 6,95  |       |       |       |       |       |
|                    | 50 | 6,59   | 3,02   | 4,19   | 4,60   | 1,82  | 93,41 | 96,98 | 95,81 | 95,40 | 1,82  |       |       |       |       |       |
|                    | 55 | 7,45   | 5,34   | 4,59   | 5,79   | 1,48  | 92,55 | 94,66 | 95,41 | 94,21 | 1,48  |       |       |       |       |       |
|                    | 60 | 1,84   | 6,83   | 0,74   | 3,14   | 3,25  | 98,16 | 93,17 | 99,26 | 96,86 | 3,25  |       |       |       |       |       |
| dU(+5)ScdG         | 0  | 100,00 | 100,00 | 100,00 | 100,00 | 0,00  | 0,00  | 0,00  | 0,00  | 0,00  | 0,00  |       |       |       |       |       |
|                    | 1  | 100,00 | 99,81  | 100,00 | 99,94  | 0,11  | 0,00  | 0,19  | 0,00  | 0,06  | 0,11  |       |       |       |       |       |
|                    | 5  | 77,55  | 78,42  | 67,68  | 74,55  | 5,96  | 22,45 | 21,58 | 32,32 | 25,45 | 5,96  |       |       |       |       |       |
|                    | 10 | 63,30  | 58,53  | 37,58  | 53,14  | 13,68 | 36,70 | 41,47 | 62,42 | 46,86 | 13,68 |       |       |       |       |       |
|                    | 15 | 49,94  | 36,41  | 28,40  | 38,25  | 10,88 | 50,06 | 63,59 | 71,60 | 61,75 | 10,88 |       |       |       |       |       |
|                    | 20 | 34,68  | 28,64  | 15,19  | 26,17  | 9,98  | 65,32 | 71,36 | 84,81 | 73,83 | 9,98  |       |       |       |       |       |
|                    | 25 | 27,97  | 23,31  | 19,94  | 23,74  | 4,03  | 72,03 | 76,69 | 80,06 | 76,26 | 4,03  |       |       |       |       |       |
|                    | 30 | 24,12  | 11,10  | 1,12   | 12,11  | 11,54 | 75,88 | 88,90 | 98,88 | 87,89 | 11,54 |       |       |       |       |       |
|                    | 35 | 0,24   | 0,85   | 0,08   | 0,39   | 0,40  | 99,76 | 99,15 | 99,92 | 99,61 | 0,40  |       |       |       |       |       |
|                    | 40 | 0,41   | 0,99   | 0,12   | 0,51   | 0,44  | 99,59 | 99,01 | 99,88 | 99,49 | 0,44  |       |       |       |       |       |
|                    | 45 | 0,74   | 1,05   | 0,16   | 0,65   | 0,45  | 99,26 | 98,95 | 99,84 | 99,35 | 0,45  |       |       |       |       |       |
|                    | 50 | 1,12   | 0,75   | 0,25   | 0,70   | 0,44  | 98,88 | 99,25 | 99,75 | 99,30 | 0,44  |       |       |       |       |       |
|                    | 55 | 0,36   | 0,88   | 0,25   | 0,50   | 0,34  | 99,64 | 99,12 | 99,75 | 99,50 | 0,34  |       |       |       |       |       |
|                    | 60 | 0,28   | 0,43   | 0,15   | 0,29   | 0,14  | 99,72 | 99,57 | 99,85 | 99,71 | 0,14  |       |       |       |       |       |
| dU(-5)<br>(+5)ScdG | 0  | 100,00 | 99,98  | 100,00 | 99,99  | 0,01  | 0,00  | 0,02  | 0,00  | 0,01  | 0,01  | 0,00  | 0,00  | 0,00  | 0,00  | 0,00  |
|                    | 1  | 99,99  | 98,02  | 96,03  | 98,02  | 1,98  | 0,01  | 1,04  | 1,34  | 0,79  | 0,70  | 0,00  | 0,95  | 2,63  | 1,19  | 1,33  |
|                    | 5  | 75,09  | 70,15  | 59,62  | 68,29  | 7,90  | 12,19 | 16,35 | 19,99 | 16,18 | 3,90  | 12,72 | 13,49 | 20,38 | 15,53 | 4,22  |
|                    | 10 | 48,10  | 31,26  | 37,12  | 38,82  | 8,55  | 27,40 | 41,64 | 32,57 | 33,87 | 7,21  | 24,50 | 27,10 | 30,32 | 27,31 | 2,91  |
|                    | 15 | 36,61  | 16,85  | 27,00  | 26,82  | 9,89  | 35,84 | 53,74 | 39,72 | 43,10 | 9,42  | 27,55 | 29,42 | 33,28 | 30,08 | 2,92  |
|                    | 20 | 28,65  | 9,62   | 15,37  | 17,88  | 9,76  | 43,76 | 62,52 | 49,99 | 52,09 | 9,55  | 27,58 | 27,86 | 34,64 | 30,03 | 4,00  |
|                    | 25 | 15,57  | 2,98   | 27,08  | 15,21  | 12,05 | 55,43 | 72,70 | 40,73 | 56,29 | 16,01 | 29,00 | 24,31 | 32,19 | 28,50 | 3,96  |
|                    | 30 | 5,18   | 0,59   | 4,73   | 3,50   | 2,53  | 69,08 | 81,65 | 61,27 | 70,67 | 10,28 | 25,73 | 17,76 | 34,00 | 25,83 | 8,12  |
|                    | 35 | 0,19   | 1,57   | 3,75   | 1,84   | 1,80  | 99,43 | 77,03 | 63,20 | 79,89 | 18,28 | 0,38  | 21,39 | 33,05 | 18,27 | 16,56 |
|                    | 40 | 0,77   | 0,12   | 1,86   | 0,92   | 0,88  | 89,18 | 94,83 | 75,32 | 86,44 | 10,04 | 10,05 | 5,05  | 22,82 | 12,64 | 9,16  |
|                    | 45 | 10,05  | 0,19   | 0,41   | 3,55   | 5,63  | 60,47 | 95,08 | 99,51 | 85,02 | 21,38 | 29,48 | 4,73  | 0,08  | 11,43 | 15,81 |
|                    | 50 | 0,51   | 0,01   | 0,43   | 0,32   | 0,27  | 86,30 | 99,01 | 99,53 | 94,95 | 7,49  | 13,19 | 0,97  | 0,04  | 4,74  | 7,34  |
|                    | 55 | 0,12   | 0,02   | 0,72   | 0,29   | 0,38  | 90,66 | 99,98 | 98,92 | 96,52 | 5,10  | 9,23  | 0,00  | 0,36  | 3,20  | 5,22  |
|                    | 60 | 0,29   | 0,04   | 0,40   | 0,24   | 0,18  | 93,15 | 99,79 | 94,23 | 95,72 | 3,56  | 6,56  | 0,17  | 5,37  | 4,03  | 3,40  |
| RcdG               |    |        |        |        |        |       |       |       |       |       |       |       |       |       |       |       |
| dU(-5)RcdG         | 0  | 99,50  | 99,98  | 100,00 | 99,83  | 0,28  | 0,50  | 0,02  | 0,00  | 0,17  | 0,28  |       |       |       |       |       |
|                    | 1  | 99,30  | 99,94  | 99,36  | 99,53  | 0,35  | 0,70  | 0,06  | 0,64  | 0,47  | 0,35  |       |       |       |       |       |

|                    |    |        |       |        |       |       |       |       |       |       |       |       |       |       |       |      |
|--------------------|----|--------|-------|--------|-------|-------|-------|-------|-------|-------|-------|-------|-------|-------|-------|------|
|                    | 5  | 92,74  | 90,06 | 75,41  | 86,07 | 9,33  | 7,26  | 9,94  | 24,59 | 13,93 | 9,33  |       |       |       |       |      |
|                    | 10 | 76,26  | 70,53 | 52,30  | 66,36 | 12,51 | 23,74 | 29,47 | 47,70 | 33,64 | 12,51 |       |       |       |       |      |
|                    | 15 | 67,65  | 65,08 | 35,81  | 56,18 | 17,69 | 32,35 | 34,92 | 64,19 | 43,82 | 17,69 |       |       |       |       |      |
|                    | 20 | 58,52  | 49,25 | 27,19  | 44,98 | 16,10 | 41,48 | 50,75 | 72,81 | 55,02 | 16,10 |       |       |       |       |      |
|                    | 25 | 50,10  | 54,18 | 27,26  | 43,85 | 14,51 | 49,90 | 45,82 | 72,74 | 56,15 | 14,51 |       |       |       |       |      |
|                    | 30 | 49,96  | 28,87 | 17,63  | 32,15 | 16,41 | 50,04 | 71,13 | 82,37 | 67,85 | 16,41 |       |       |       |       |      |
|                    | 35 | 2,46   | 18,35 | 0,44   | 7,08  | 9,81  | 97,54 | 81,65 | 99,56 | 92,92 | 9,81  |       |       |       |       |      |
|                    | 40 | 14,94  | 12,85 | 2,81   | 10,20 | 6,49  | 85,06 | 87,15 | 97,19 | 89,80 | 6,49  |       |       |       |       |      |
|                    | 45 | 7,44   | 5,68  | 0,25   | 4,46  | 3,75  | 92,56 | 94,32 | 99,75 | 95,54 | 3,75  |       |       |       |       |      |
|                    | 50 | 5,95   | 6,94  | 1,33   | 4,74  | 2,99  | 94,05 | 93,06 | 98,67 | 95,26 | 2,99  |       |       |       |       |      |
|                    | 55 | 13,31  | 13,21 | 1,28   | 9,27  | 6,92  | 86,69 | 86,79 | 98,72 | 90,73 | 6,92  |       |       |       |       |      |
|                    | 60 | 29,95  | 12,32 | 0,64   | 14,31 | 14,75 | 70,05 | 87,68 | 99,36 | 85,69 | 14,75 |       |       |       |       |      |
| dU(+5)RcdG         | 0  | 100,00 | 99,84 | 100,00 | 99,95 | 0,09  | 0,00  | 0,16  | 0,00  | 0,05  | 0,09  |       |       |       |       |      |
|                    | 1  | 99,91  | 96,95 | 100,00 | 98,95 | 1,73  | 0,09  | 3,05  | 0,00  | 1,05  | 1,73  |       |       |       |       |      |
|                    | 5  | 63,89  | 58,79 | 84,52  | 69,06 | 13,62 | 36,11 | 41,21 | 15,48 | 30,94 | 13,62 |       |       |       |       |      |
|                    | 10 | 44,58  | 30,67 | 41,16  | 38,80 | 7,25  | 55,42 | 69,33 | 58,84 | 61,20 | 7,25  |       |       |       |       |      |
|                    | 15 | 28,67  | 23,51 | 14,28  | 22,15 | 7,29  | 71,33 | 76,49 | 85,72 | 77,85 | 7,29  |       |       |       |       |      |
|                    | 20 | 12,14  | 5,01  | 3,72   | 6,95  | 4,53  | 87,86 | 94,99 | 96,28 | 93,05 | 4,53  |       |       |       |       |      |
|                    | 25 | 8,46   | 4,31  | 1,03   | 4,60  | 3,73  | 91,54 | 95,69 | 98,97 | 95,40 | 3,73  |       |       |       |       |      |
|                    | 30 | 4,98   | 2,10  | 0,31   | 2,46  | 2,35  | 95,02 | 97,90 | 99,69 | 97,54 | 2,35  |       |       |       |       |      |
|                    | 35 | 0,94   | 1,99  | 0,19   | 1,04  | 0,90  | 99,06 | 98,01 | 99,81 | 98,96 | 0,90  |       |       |       |       |      |
|                    | 40 | 7,00   | 2,49  | 0,02   | 3,17  | 3,54  | 93,00 | 97,51 | 99,98 | 96,83 | 3,54  |       |       |       |       |      |
|                    | 45 | 3,22   | 1,14  | 0,01   | 1,46  | 1,63  | 96,78 | 98,86 | 99,99 | 98,54 | 1,63  |       |       |       |       |      |
|                    | 50 | 1,42   | 1,54  | 0,03   | 0,99  | 0,84  | 98,58 | 98,46 | 99,97 | 99,01 | 0,84  |       |       |       |       |      |
| dU(-5)<br>(+5)RcdG | 55 | 0,40   | 1,87  | 0,10   | 0,79  | 0,95  | 99,60 | 98,13 | 99,90 | 99,21 | 0,95  |       |       |       |       |      |
|                    | 60 | 0,38   | 1,20  | 0,01   | 0,53  | 0,61  | 99,62 | 98,80 | 99,99 | 99,47 | 0,61  |       |       |       |       |      |
|                    | 0  | 99,71  | 99,79 | 99,86  | 99,79 | 0,08  | 0,12  | 0,00  | 0,03  | 0,05  | 0,07  | 0,16  | 0,21  | 0,11  | 0,16  | 0,05 |
|                    | 1  | 85,07  | 82,78 | 86,66  | 84,84 | 1,95  | 6,12  | 7,44  | 5,93  | 6,49  | 0,82  | 8,82  | 9,78  | 7,41  | 8,67  | 1,19 |
|                    | 5  | 51,45  | 46,45 | 48,63  | 48,84 | 2,51  | 22,95 | 26,88 | 26,86 | 25,56 | 2,27  | 25,60 | 26,67 | 24,51 | 25,59 | 1,08 |
|                    | 10 | 46,45  | 30,40 | 22,90  | 33,25 | 12,03 | 26,97 | 38,34 | 48,29 | 37,87 | 10,67 | 26,58 | 31,26 | 28,81 | 28,88 | 2,34 |
|                    | 15 | 28,93  | 17,64 | 18,96  | 21,84 | 6,17  | 39,92 | 50,62 | 54,59 | 48,38 | 7,59  | 31,15 | 31,74 | 26,45 | 29,78 | 2,90 |
|                    | 20 | 19,99  | 10,09 | 14,55  | 14,87 | 4,96  | 47,82 | 64,54 | 62,52 | 58,29 | 9,13  | 32,19 | 25,37 | 22,93 | 26,83 | 4,80 |
|                    | 25 | 17,60  | 4,64  | 28,39  | 16,87 | 11,89 | 52,92 | 79,70 | 48,10 | 60,24 | 17,02 | 29,48 | 15,67 | 23,51 | 22,88 | 6,93 |
|                    | 30 | 3,98   | 8,59  | 6,57   | 6,38  | 2,31  | 77,03 | 74,69 | 80,98 | 77,57 | 3,18  | 18,99 | 16,71 | 12,45 | 16,05 | 3,32 |
|                    | 35 | 14,14  | 5,83  | 8,26   | 9,41  | 4,28  | 77,05 | 92,26 | 84,83 | 84,71 | 7,60  | 8,80  | 1,91  | 6,91  | 5,88  | 3,56 |
|                    | 40 | 32,14  | 9,71  | 21,77  | 21,21 | 11,22 | 56,58 | 87,56 | 69,15 | 71,10 | 15,58 | 11,28 | 2,73  | 9,08  | 7,70  | 4,44 |
|                    | 45 | 18,96  | 12,18 | 17,79  | 16,31 | 3,63  | 72,47 | 86,88 | 74,65 | 78,00 | 7,77  | 8,57  | 0,94  | 7,56  | 5,69  | 4,14 |
|                    | 50 | 21,46  | 17,18 | 15,97  | 18,20 | 2,88  | 70,88 | 82,18 | 81,11 | 78,06 | 6,24  | 7,66  | 0,64  | 2,91  | 3,74  | 3,58 |
|                    | 55 | 24,19  | 34,08 | 13,04  | 23,77 | 10,53 | 73,71 | 62,25 | 82,16 | 72,71 | 9,99  | 2,10  | 3,67  | 4,80  | 3,52  | 1,36 |
|                    | 60 | 19,73  | 23,10 | 18,49  | 20,44 | 2,38  | 80,27 | 72,66 | 79,10 | 77,34 | 4,10  | 0,00  | 4,25  | 2,40  | 2,22  | 2,13 |

**Table S3. Raw numerical data of hAPE1 cleavage assays obtained from Quantity One software.**

| Oligo                           | Time<br>[min] | 1                          | 2      | 3      | Avg   | SD    | 1                  | 2      | 3      | Avg   | SD    |
|---------------------------------|---------------|----------------------------|--------|--------|-------|-------|--------------------|--------|--------|-------|-------|
|                                 |               | Intact oligonucleotide [%] |        |        |       |       | Cleaved strand [%] |        |        |       |       |
| Native control oligonucleotides |               |                            |        |        |       |       |                    |        |        |       |       |
| dU0                             | 0             | 99,29                      | 96,84  | 100,00 | 98,71 | 1,66  | 0,71               | 3,16   | 0,00   | 1,29  | 1,66  |
|                                 | 1             | 100,00                     | 98,74  | 100,00 | 99,58 | 0,73  | 0,00               | 1,26   | 0,00   | 0,42  | 0,73  |
|                                 | 5             | 99,40                      | 94,82  | 100,00 | 98,07 | 2,83  | 0,60               | 5,18   | 0,00   | 1,93  | 2,83  |
|                                 | 10            | 98,97                      | 93,65  | 99,88  | 97,50 | 3,37  | 1,03               | 6,35   | 0,12   | 2,50  | 3,37  |
|                                 | 15            | 97,98                      | 91,36  | 99,54  | 96,29 | 4,35  | 2,02               | 8,64   | 0,46   | 3,71  | 4,35  |
|                                 | 20            | 95,94                      | 87,18  | 98,85  | 93,99 | 6,07  | 4,06               | 12,82  | 1,15   | 6,01  | 6,07  |
|                                 | 25            | 92,19                      | 84,92  | 97,08  | 91,40 | 6,12  | 7,81               | 15,08  | 2,92   | 8,60  | 6,12  |
|                                 | 30            | 79,20                      | 61,86  | 70,79  | 70,62 | 8,67  | 20,80              | 38,14  | 29,21  | 29,38 | 8,67  |
|                                 | 60            | 57,27                      | 36,75  | 53,17  | 49,06 | 10,86 | 42,73              | 63,25  | 46,83  | 50,94 | 10,86 |
|                                 | 90            | 33,05                      | 27,38  | 36,75  | 32,39 | 4,72  | 66,95              | 72,62  | 63,25  | 67,61 | 4,72  |
|                                 | 120           | 12,49                      | 3,99   | 0,56   | 5,68  | 6,14  | 87,51              | 96,01  | 99,44  | 94,32 | 6,14  |
|                                 | 150           | 5,95                       | 0,00   | 0,32   | 2,09  | 3,35  | 94,05              | 100,00 | 99,68  | 97,91 | 3,35  |
|                                 | 180           | 7,23                       | 0,00   | 0,10   | 2,44  | 4,15  | 92,77              | 100,00 | 99,90  | 97,56 | 4,15  |
| dU(-5)<br>(+5)dA                | 0             | 99,93                      | 99,99  | 99,80  | 99,91 | 0,10  | 0,07               | 0,01   | 0,20   | 0,09  | 0,10  |
|                                 | 1             | 100,00                     | 100,00 | 99,92  | 99,97 | 0,04  | 0,00               | 0,00   | 0,08   | 0,03  | 0,04  |
|                                 | 5             | 99,84                      | 97,84  | 96,09  | 97,92 | 1,87  | 0,16               | 2,16   | 3,91   | 2,08  | 1,87  |
|                                 | 10            | 83,76                      | 90,22  | 87,68  | 87,22 | 3,25  | 16,24              | 9,78   | 12,32  | 12,78 | 3,25  |
|                                 | 15            | 73,53                      | 77,18  | 73,06  | 74,59 | 2,26  | 26,47              | 22,82  | 26,94  | 25,41 | 2,26  |
|                                 | 20            | 59,71                      | 60,79  | 63,61  | 61,37 | 2,02  | 40,29              | 39,21  | 36,39  | 38,63 | 2,02  |
|                                 | 25            | 55,73                      | 50,66  | 64,42  | 56,94 | 6,96  | 44,27              | 49,34  | 35,58  | 43,06 | 6,96  |
|                                 | 30            | 34,06                      | 26,12  | 36,18  | 32,12 | 5,30  | 65,94              | 73,88  | 63,82  | 67,88 | 5,30  |
|                                 | 60            | 8,14                       | 6,86   | 10,33  | 8,44  | 1,75  | 91,86              | 93,14  | 89,67  | 91,56 | 1,75  |
|                                 | 90            | 0,18                       | 1,45   | 0,00   | 0,54  | 0,79  | 99,82              | 98,55  | 100,00 | 99,46 | 0,79  |
|                                 | 120           | 0,02                       | 2,71   | 0,00   | 0,91  | 1,56  | 99,98              | 97,29  | 100,00 | 99,09 | 1,56  |
|                                 | 150           | 0,36                       | 1,20   | 0,00   | 0,52  | 0,62  | 99,64              | 98,80  | 100,00 | 99,48 | 0,62  |
|                                 | 180           | 0,06                       | 0,67   | 0,00   | 0,24  | 0,37  | 99,94              | 99,33  | 100,00 | 99,76 | 0,37  |
| ScdA                            |               |                            |        |        |       |       |                    |        |        |       |       |
| dU(-5)ScdA                      | 0             | 99,54                      | 99,81  | 99,79  | 99,71 | 0,15  | 0,46               | 0,19   | 0,21   | 0,29  | 0,15  |
|                                 | 1             | 99,97                      | 99,64  | 99,76  | 99,79 | 0,17  | 0,03               | 0,36   | 0,24   | 0,21  | 0,17  |
|                                 | 5             | 98,01                      | 98,31  | 99,15  | 98,49 | 0,59  | 1,99               | 1,69   | 0,85   | 1,51  | 0,59  |
|                                 | 10            | 96,38                      | 96,36  | 98,04  | 96,93 | 0,96  | 3,62               | 3,64   | 1,96   | 3,07  | 0,96  |
|                                 | 15            | 93,24                      | 91,40  | 96,01  | 93,55 | 2,32  | 6,76               | 8,60   | 3,99   | 6,45  | 2,32  |
|                                 | 20            | 78,57                      | 82,29  | 92,32  | 84,39 | 7,11  | 21,43              | 17,71  | 7,68   | 15,61 | 7,11  |
|                                 | 25            | 79,68                      | 79,18  | 87,31  | 82,06 | 4,56  | 20,32              | 20,82  | 12,69  | 17,94 | 4,56  |
|                                 | 30            | 14,22                      | 56,13  | 80,56  | 50,30 | 33,55 | 85,78              | 43,87  | 19,44  | 49,70 | 33,55 |
|                                 | 60            | 13,09                      | 6,79   | 9,32   | 9,73  | 3,17  | 86,91              | 93,21  | 90,68  | 90,27 | 3,17  |
|                                 | 90            | 2,01                       | 2,88   | 4,83   | 3,24  | 1,44  | 97,99              | 97,12  | 95,17  | 96,76 | 1,44  |

|                    |     |        |        |       |       |       |       |       |       |       |       |
|--------------------|-----|--------|--------|-------|-------|-------|-------|-------|-------|-------|-------|
|                    | 120 | 1,41   | 0,78   | 0,63  | 0,94  | 0,41  | 98,59 | 99,22 | 99,37 | 99,06 | 0,41  |
|                    | 150 | 0,71   | 0,90   | 2,06  | 1,22  | 0,73  | 99,29 | 99,10 | 97,94 | 98,78 | 0,73  |
|                    | 180 | 0,67   | 0,67   | 0,42  | 0,59  | 0,15  | 99,33 | 99,33 | 99,58 | 99,41 | 0,15  |
| dU(+5)ScdA         | 0   | 100,00 | 100,00 | 99,84 | 99,95 | 0,09  | 0,00  | 0,00  | 0,16  | 0,05  | 0,09  |
|                    | 1   | 99,89  | 97,76  | 98,85 | 98,83 | 1,07  | 0,11  | 2,24  | 1,15  | 1,17  | 1,07  |
|                    | 5   | 88,41  | 88,56  | 90,93 | 89,30 | 1,41  | 11,59 | 11,44 | 9,07  | 10,70 | 1,41  |
|                    | 10  | 75,35  | 65,81  | 70,51 | 70,56 | 4,77  | 24,65 | 34,19 | 29,49 | 29,44 | 4,77  |
|                    | 15  | 57,09  | 51,77  | 51,38 | 53,41 | 3,18  | 42,91 | 48,23 | 48,62 | 46,59 | 3,18  |
|                    | 20  | 52,08  | 41,53  | 43,19 | 45,60 | 5,67  | 47,92 | 58,47 | 56,81 | 54,40 | 5,67  |
|                    | 25  | 40,78  | 29,27  | 38,55 | 36,20 | 6,10  | 59,22 | 70,73 | 61,45 | 63,80 | 6,10  |
|                    | 30  | 38,40  | 25,29  | 29,24 | 30,97 | 6,72  | 61,60 | 74,71 | 70,76 | 69,03 | 6,72  |
|                    | 60  | 11,34  | 13,75  | 8,50  | 11,20 | 2,63  | 88,66 | 86,25 | 91,50 | 88,80 | 2,63  |
|                    | 90  | 2,96   | 3,24   | 4,68  | 3,63  | 0,92  | 97,04 | 96,76 | 95,32 | 96,37 | 0,92  |
|                    | 120 | 2,69   | 3,43   | 3,46  | 3,19  | 0,44  | 97,31 | 96,57 | 96,54 | 96,81 | 0,44  |
|                    | 150 | 2,14   | 2,82   | 3,46  | 2,81  | 0,66  | 97,86 | 97,18 | 96,54 | 97,19 | 0,66  |
|                    | 180 | 1,91   | 3,57   | 13,00 | 6,16  | 5,98  | 98,09 | 96,43 | 87,00 | 93,84 | 5,98  |
|                    |     |        |        |       |       |       |       |       |       |       |       |
| dU(-5)<br>(+5)ScdA | 0   | 100,00 | 99,48  | 99,49 | 99,66 | 0,30  | 0,00  | 0,52  | 0,51  | 0,34  | 0,30  |
|                    | 1   | 99,92  | 99,24  | 99,66 | 99,60 | 0,34  | 0,08  | 0,76  | 0,34  | 0,40  | 0,34  |
|                    | 5   | 89,17  | 71,69  | 96,49 | 85,78 | 12,74 | 10,83 | 28,31 | 3,51  | 14,22 | 12,74 |
|                    | 10  | 71,05  | 46,53  | 90,37 | 69,32 | 21,97 | 28,95 | 53,47 | 9,63  | 30,68 | 21,97 |
|                    | 15  | 56,28  | 28,22  | 60,58 | 48,36 | 17,57 | 43,72 | 71,78 | 39,42 | 51,64 | 17,57 |
|                    | 20  | 35,53  | 18,09  | 60,63 | 38,09 | 21,39 | 64,47 | 81,91 | 39,37 | 61,91 | 21,39 |
|                    | 25  | 31,34  | 12,25  | 35,22 | 26,27 | 12,29 | 68,66 | 87,75 | 64,78 | 73,73 | 12,29 |
|                    | 30  | 42,70  | 2,66   | 10,04 | 18,47 | 21,31 | 57,30 | 97,34 | 89,96 | 81,53 | 21,31 |
|                    | 60  | 9,32   | 1,89   | 3,23  | 4,81  | 3,96  | 90,68 | 98,11 | 96,77 | 95,19 | 3,96  |
|                    | 90  | 3,67   | 1,12   | 1,88  | 2,22  | 1,31  | 96,33 | 98,88 | 98,12 | 97,78 | 1,31  |
|                    | 120 | 2,38   | 0,62   | 1,72  | 1,57  | 0,89  | 97,62 | 99,38 | 98,28 | 98,43 | 0,89  |
|                    | 150 | 1,73   | 1,31   | 1,19  | 1,41  | 0,29  | 98,27 | 98,69 | 98,81 | 98,59 | 0,29  |
|                    | 180 | 0,87   | 0,48   | 0,87  | 0,74  | 0,23  | 99,13 | 99,52 | 99,13 | 99,26 | 0,23  |
|                    |     |        |        |       |       |       |       |       |       |       |       |
| RcdA               |     |        |        |       |       |       |       |       |       |       |       |
| dU(-5)RcdA         | 0   | 99,89  | 99,85  | 97,23 | 98,99 | 1,52  | 0,11  | 0,15  | 2,77  | 1,01  | 1,52  |
|                    | 1   | 99,79  | 99,34  | 94,37 | 97,83 | 3,01  | 0,21  | 0,66  | 5,63  | 2,17  | 3,01  |
|                    | 5   | 91,32  | 76,60  | 78,02 | 81,98 | 8,12  | 8,68  | 23,40 | 21,98 | 18,02 | 8,12  |
|                    | 10  | 76,77  | 51,80  | 37,80 | 55,46 | 19,74 | 23,23 | 48,20 | 62,20 | 44,54 | 19,74 |
|                    | 15  | 50,25  | 35,84  | 48,58 | 44,89 | 7,88  | 49,75 | 64,16 | 51,42 | 55,11 | 7,88  |
|                    | 20  | 31,83  | 11,18  | 10,53 | 17,85 | 12,12 | 68,17 | 88,82 | 89,47 | 82,15 | 12,12 |
|                    | 25  | 27,93  | 10,01  | 4,91  | 14,28 | 12,09 | 72,07 | 89,99 | 95,09 | 85,72 | 12,09 |
|                    | 30  | 8,27   | 3,20   | 1,25  | 4,24  | 3,63  | 91,73 | 96,80 | 98,75 | 95,76 | 3,63  |
|                    | 60  | 0,10   | 0,68   | 0,40  | 0,39  | 0,29  | 99,90 | 99,32 | 99,60 | 99,61 | 0,29  |
|                    | 90  | 0,14   | 0,76   | 0,36  | 0,42  | 0,31  | 99,86 | 99,24 | 99,64 | 99,58 | 0,31  |
|                    | 120 | 0,30   | 0,90   | 0,20  | 0,47  | 0,38  | 99,70 | 99,10 | 99,80 | 99,53 | 0,38  |

|                    |     |        |        |        |       |       |       |       |       |       |       |
|--------------------|-----|--------|--------|--------|-------|-------|-------|-------|-------|-------|-------|
|                    | 150 | 0,33   | 0,87   | 0,23   | 0,48  | 0,34  | 99,67 | 99,13 | 99,77 | 99,52 | 0,34  |
|                    | 180 | 0,59   | 1,13   | 0,05   | 0,59  | 0,54  | 99,41 | 98,87 | 99,95 | 99,41 | 0,54  |
| dU(+5)RcdA         | 0   | 99,98  | 99,91  | 99,83  | 99,90 | 0,08  | 0,02  | 0,09  | 0,17  | 0,10  | 0,08  |
|                    | 1   | 97,00  | 94,31  | 94,40  | 95,24 | 1,53  | 3,00  | 5,69  | 5,60  | 4,76  | 1,53  |
|                    | 5   | 81,86  | 79,20  | 73,89  | 78,32 | 4,06  | 18,14 | 20,80 | 26,11 | 21,68 | 4,06  |
|                    | 10  | 70,97  | 62,27  | 60,04  | 64,43 | 5,78  | 29,03 | 37,73 | 39,96 | 35,57 | 5,78  |
|                    | 15  | 62,09  | 87,61  | 44,78  | 64,83 | 21,55 | 37,91 | 12,39 | 55,22 | 35,17 | 21,55 |
|                    | 20  | 50,36  | 41,04  | 41,99  | 44,46 | 5,13  | 49,64 | 58,96 | 58,01 | 55,54 | 5,13  |
|                    | 25  | 44,15  | 40,79  | 36,96  | 40,63 | 3,60  | 55,85 | 59,21 | 63,04 | 59,37 | 3,60  |
|                    | 30  | 41,05  | 22,36  | 24,16  | 29,19 | 10,31 | 58,95 | 77,64 | 75,84 | 70,81 | 10,31 |
|                    | 60  | 19,78  | 4,25   | 8,49   | 10,84 | 8,03  | 80,22 | 95,75 | 91,51 | 89,16 | 8,03  |
|                    | 90  | 14,51  | 2,19   | 3,22   | 6,64  | 6,84  | 85,49 | 97,81 | 96,78 | 93,36 | 6,84  |
|                    | 120 | 6,74   | 3,18   | 6,28   | 5,40  | 1,93  | 93,26 | 96,82 | 93,72 | 94,60 | 1,93  |
|                    | 150 | 5,56   | 3,56   | 8,63   | 5,91  | 2,56  | 94,44 | 96,44 | 91,37 | 94,09 | 2,56  |
|                    | 180 | 6,51   | 3,15   | 5,13   | 4,93  | 1,69  | 93,49 | 96,85 | 94,87 | 95,07 | 1,69  |
| dU(-5)<br>(+5)RcdA | 0   | 99,94  | 99,87  | 100,00 | 99,94 | 0,07  | 0,06  | 0,13  | 0,00  | 0,06  | 0,07  |
|                    | 1   | 97,43  | 97,75  | 100,00 | 98,39 | 1,40  | 2,57  | 2,25  | 0,00  | 1,61  | 1,40  |
|                    | 5   | 90,46  | 82,48  | 100,00 | 90,98 | 8,77  | 9,54  | 17,52 | 0,00  | 9,02  | 8,77  |
|                    | 10  | 73,49  | 72,85  | 72,40  | 72,92 | 0,55  | 26,51 | 27,15 | 27,60 | 27,08 | 0,55  |
|                    | 15  | 61,51  | 62,10  | 57,42  | 60,34 | 2,55  | 38,49 | 37,90 | 42,58 | 39,66 | 2,55  |
|                    | 20  | 59,55  | 50,29  | 56,59  | 55,47 | 4,73  | 40,45 | 49,71 | 43,41 | 44,53 | 4,73  |
|                    | 25  | 44,39  | 32,23  | 44,05  | 40,22 | 6,93  | 55,61 | 67,77 | 55,95 | 59,78 | 6,93  |
|                    | 30  | 50,30  | 20,77  | 34,06  | 35,04 | 14,79 | 49,70 | 79,23 | 65,94 | 64,96 | 14,79 |
|                    | 60  | 37,27  | 29,28  | 28,30  | 31,62 | 4,92  | 62,73 | 70,72 | 71,70 | 68,38 | 4,92  |
|                    | 90  | 11,30  | 3,92   | 8,82   | 8,02  | 3,76  | 88,70 | 96,08 | 91,18 | 91,98 | 3,76  |
|                    | 120 | 4,71   | 6,04   | 7,93   | 6,22  | 1,62  | 95,29 | 93,96 | 92,07 | 93,78 | 1,62  |
|                    | 150 | 4,19   | 2,36   | 5,23   | 3,93  | 1,45  | 95,81 | 97,64 | 94,77 | 96,07 | 1,45  |
|                    | 180 | 5,42   | 1,93   | 3,50   | 3,62  | 1,75  | 94,58 | 98,07 | 96,50 | 96,38 | 1,75  |
| ScdG               |     |        |        |        |       |       |       |       |       |       |       |
| dU(-5)ScdG         | 0   | 99,87  | 100,00 | 99,77  | 99,88 | 0,11  | 0,13  | 0,00  | 0,23  | 0,12  | 0,11  |
|                    | 1   | 100,00 | 100,00 | 99,69  | 99,90 | 0,18  | 0,00  | 0,00  | 0,31  | 0,10  | 0,18  |
|                    | 5   | 89,73  | 98,93  | 95,28  | 94,65 | 4,63  | 10,27 | 1,07  | 4,72  | 5,35  | 4,63  |
|                    | 10  | 74,02  | 91,22  | 83,61  | 82,95 | 8,62  | 25,98 | 8,78  | 16,39 | 17,05 | 8,62  |
|                    | 15  | 57,17  | 79,51  | 69,58  | 68,75 | 11,19 | 42,83 | 20,49 | 30,42 | 31,25 | 11,19 |
|                    | 20  | 44,84  | 67,24  | 61,06  | 57,71 | 11,57 | 55,16 | 32,76 | 38,94 | 42,29 | 11,57 |
|                    | 25  | 44,13  | 56,96  | 51,53  | 50,87 | 6,44  | 55,87 | 43,04 | 48,47 | 49,13 | 6,44  |
|                    | 30  | 28,53  | 18,13  | 22,33  | 23,00 | 5,23  | 71,47 | 81,87 | 77,67 | 77,00 | 5,23  |
|                    | 60  | 6,22   | 6,95   | 8,31   | 7,16  | 1,06  | 93,78 | 93,05 | 91,69 | 92,84 | 1,06  |
|                    | 90  | 1,42   | 0,98   | 2,06   | 1,48  | 0,54  | 98,58 | 99,02 | 97,94 | 98,52 | 0,54  |
|                    | 120 | 0,84   | 0,94   | 2,08   | 1,29  | 0,69  | 99,16 | 99,06 | 97,92 | 98,71 | 0,69  |
|                    | 150 | 0,66   | 1,03   | 1,40   | 1,03  | 0,37  | 99,34 | 98,97 | 98,60 | 98,97 | 0,37  |

|                    |     |        |        |        |        |       |       |        |        |       |       |
|--------------------|-----|--------|--------|--------|--------|-------|-------|--------|--------|-------|-------|
|                    | 180 | 0,27   | 0,59   | 1,20   | 0,68   | 0,47  | 99,73 | 99,41  | 98,80  | 99,32 | 0,47  |
| dU(+5)ScdG         | 0   | 99,82  | 100,00 | 99,97  | 99,93  | 0,10  | 0,18  | 0,00   | 0,03   | 0,07  | 0,10  |
|                    | 1   | 94,37  | 100,00 | 99,17  | 97,85  | 3,04  | 5,63  | 0,00   | 0,83   | 2,15  | 3,04  |
|                    | 5   | 81,24  | 97,00  | 86,87  | 88,37  | 7,99  | 18,76 | 3,00   | 13,13  | 11,63 | 7,99  |
|                    | 10  | 69,39  | 74,92  | 67,07  | 70,46  | 4,03  | 30,61 | 25,08  | 32,93  | 29,54 | 4,03  |
|                    | 15  | 54,72  | 61,49  | 64,31  | 60,17  | 4,93  | 45,28 | 38,51  | 35,69  | 39,83 | 4,93  |
|                    | 20  | 43,52  | 30,93  | 40,15  | 38,20  | 6,52  | 56,48 | 69,07  | 59,85  | 61,80 | 6,52  |
|                    | 25  | 40,68  | 28,94  | 35,90  | 35,17  | 5,91  | 59,32 | 71,06  | 64,10  | 64,83 | 5,91  |
|                    | 30  | 22,03  | 5,98   | 9,56   | 12,52  | 8,42  | 77,97 | 94,02  | 90,44  | 87,48 | 8,42  |
|                    | 60  | 5,41   | 0,00   | 2,23   | 2,55   | 2,72  | 94,59 | 100,00 | 97,77  | 97,45 | 2,72  |
|                    | 90  | 0,75   | 0,00   | 0,33   | 0,36   | 0,37  | 99,25 | 100,00 | 99,67  | 99,64 | 0,37  |
|                    | 120 | 0,75   | 0,00   | 1,35   | 0,70   | 0,68  | 99,25 | 100,00 | 98,65  | 99,30 | 0,68  |
|                    | 150 | 0,90   | 0,00   | 0,23   | 0,38   | 0,47  | 99,10 | 100,00 | 99,77  | 99,62 | 0,47  |
|                    | 180 | 0,62   | 0,00   | 0,29   | 0,30   | 0,31  | 99,38 | 100,00 | 99,71  | 99,70 | 0,31  |
| dU(-5)<br>(+5)ScdG | 0   | 99,99  | 100,00 | 100,00 | 100,00 | 0,00  | 0,01  | 0,00   | 0,00   | 0,00  | 0,00  |
|                    | 1   | 99,57  | 100,00 | 99,98  | 99,85  | 0,24  | 0,43  | 0,00   | 0,02   | 0,15  | 0,24  |
|                    | 5   | 87,73  | 99,95  | 97,74  | 95,14  | 6,51  | 12,27 | 0,05   | 2,26   | 4,86  | 6,51  |
|                    | 10  | 74,06  | 86,44  | 86,05  | 82,18  | 7,03  | 25,94 | 13,56  | 13,95  | 17,82 | 7,03  |
|                    | 15  | 60,77  | 68,02  | 61,17  | 63,32  | 4,07  | 39,23 | 31,98  | 38,83  | 36,68 | 4,07  |
|                    | 20  | 47,50  | 47,50  | 49,65  | 48,21  | 1,24  | 52,50 | 52,50  | 50,35  | 51,79 | 1,24  |
|                    | 25  | 38,59  | 57,63  | 43,18  | 46,47  | 9,94  | 61,41 | 42,37  | 56,82  | 53,53 | 9,94  |
|                    | 30  | 29,64  | 21,44  | 22,35  | 24,48  | 4,49  | 70,36 | 78,56  | 77,65  | 75,52 | 4,49  |
|                    | 60  | 10,72  | 4,81   | 17,49  | 11,01  | 6,35  | 89,28 | 95,19  | 82,51  | 88,99 | 6,35  |
|                    | 90  | 2,57   | 0,75   | 0,77   | 1,36   | 1,05  | 97,43 | 99,25  | 99,23  | 98,64 | 1,05  |
|                    | 120 | 0,85   | 0,01   | 0,17   | 0,34   | 0,44  | 99,15 | 99,99  | 99,83  | 99,66 | 0,44  |
|                    | 150 | 0,59   | 0,00   | 0,01   | 0,20   | 0,34  | 99,41 | 100,00 | 99,99  | 99,80 | 0,34  |
|                    | 180 | 2,43   | 0,11   | 0,00   | 0,85   | 1,37  | 97,57 | 99,89  | 100,00 | 99,15 | 1,37  |
| RcdG               |     |        |        |        |        |       |       |        |        |       |       |
| dU(-5)RcdG         | 0   | 100,00 | 100,00 | 100,00 | 100,00 | 0,00  | 0,00  | 0,00   | 0,00   | 0,00  | 0,00  |
|                    | 1   | 100,00 | 100,00 | 100,00 | 100,00 | 0,00  | 0,00  | 0,00   | 0,00   | 0,00  | 0,00  |
|                    | 5   | 99,84  | 98,93  | 96,98  | 98,58  | 1,46  | 0,16  | 1,07   | 3,02   | 1,42  | 1,46  |
|                    | 10  | 91,84  | 87,39  | 84,14  | 87,79  | 3,87  | 8,16  | 12,61  | 15,86  | 12,21 | 3,87  |
|                    | 15  | 79,42  | 80,11  | 66,97  | 75,50  | 7,40  | 20,58 | 19,89  | 33,03  | 24,50 | 7,40  |
|                    | 20  | 79,27  | 73,43  | 58,18  | 70,29  | 10,89 | 20,73 | 26,57  | 41,82  | 29,71 | 10,89 |
|                    | 25  | 47,85  | 56,14  | 55,39  | 53,13  | 4,59  | 52,15 | 43,86  | 44,61  | 46,87 | 4,59  |
|                    | 30  | 12,29  | 30,89  | 37,77  | 26,98  | 13,18 | 87,71 | 69,11  | 62,23  | 73,02 | 13,18 |
|                    | 60  | 1,91   | 19,81  | 9,29   | 10,34  | 9,00  | 98,09 | 80,19  | 90,71  | 89,66 | 9,00  |
|                    | 90  | 2,34   | 1,05   | 3,28   | 2,22   | 1,12  | 97,66 | 98,95  | 96,72  | 97,78 | 1,12  |
|                    | 120 | 1,89   | 0,59   | 2,61   | 1,70   | 1,02  | 98,11 | 99,41  | 97,39  | 98,30 | 1,02  |
|                    | 150 | 1,23   | 0,58   | 11,22  | 4,34   | 5,96  | 98,77 | 99,42  | 88,78  | 95,66 | 5,96  |
|                    | 180 | 1,43   | 0,52   | 1,82   | 1,26   | 0,67  | 98,57 | 99,48  | 98,18  | 98,74 | 0,67  |

|                    |     |        |        |        |        |       |        |        |        |        |       |
|--------------------|-----|--------|--------|--------|--------|-------|--------|--------|--------|--------|-------|
| dU(+5)RcdG         | 0   | 100,00 | 100,00 | 100,00 | 100,00 | 0,00  | 0,00   | 0,00   | 0,00   | 0,00   | 0,00  |
|                    | 1   | 98,38  | 100,00 | 100,00 | 99,46  | 0,93  | 1,62   | 0,00   | 0,00   | 0,54   | 0,93  |
|                    | 5   | 93,27  | 99,98  | 99,18  | 97,48  | 3,66  | 6,73   | 0,02   | 0,82   | 2,52   | 3,66  |
|                    | 10  | 84,33  | 91,38  | 92,38  | 89,36  | 4,39  | 15,67  | 8,62   | 7,62   | 10,64  | 4,39  |
|                    | 15  | 59,69  | 70,30  | 83,95  | 71,31  | 12,16 | 40,31  | 29,70  | 16,05  | 28,69  | 12,16 |
|                    | 20  | 70,80  | 44,57  | 63,97  | 59,78  | 13,61 | 29,20  | 55,43  | 36,03  | 40,22  | 13,61 |
|                    | 25  | 0,00   | 33,83  | 56,36  | 30,06  | 28,37 | 100,00 | 66,17  | 43,64  | 69,94  | 28,37 |
|                    | 30  | 11,31  | 6,06   | 26,67  | 14,68  | 10,71 | 88,69  | 93,94  | 73,33  | 85,32  | 10,71 |
|                    | 60  | 6,54   | 5,12   | 7,70   | 6,45   | 1,29  | 93,46  | 94,88  | 92,30  | 93,55  | 1,29  |
|                    | 90  | 0,11   | 0,00   | 0,35   | 0,15   | 0,18  | 99,89  | 100,00 | 99,65  | 99,85  | 0,18  |
|                    | 120 | 0,01   | 0,00   | 0,00   | 0,00   | 0,01  | 99,99  | 100,00 | 100,00 | 100,00 | 0,01  |
|                    | 150 | 0,01   | 0,00   | 0,00   | 0,00   | 0,01  | 99,99  | 100,00 | 100,00 | 100,00 | 0,01  |
|                    | 180 | 0,00   | 0,00   | 0,00   | 0,00   | 0,00  | 100,00 | 100,00 | 100,00 | 100,00 | 0,00  |
| dU(-5)<br>(+5)RcdG | 0   | 100,00 | 99,96  | 99,55  | 99,84  | 0,25  | 0,00   | 0,04   | 0,45   | 0,16   | 0,25  |
|                    | 1   | 99,90  | 96,73  | 99,61  | 98,75  | 1,75  | 0,10   | 3,27   | 0,39   | 1,25   | 1,75  |
|                    | 5   | 97,26  | 92,30  | 96,16  | 95,24  | 2,61  | 2,74   | 7,70   | 3,84   | 4,76   | 2,61  |
|                    | 10  | 82,94  | 83,41  | 96,96  | 87,77  | 7,97  | 17,06  | 16,59  | 3,04   | 12,23  | 7,97  |
|                    | 15  | 85,43  | 68,08  | 81,35  | 78,29  | 9,07  | 14,57  | 31,92  | 18,65  | 21,71  | 9,07  |
|                    | 20  | 68,14  | 68,01  | 72,83  | 69,66  | 2,75  | 31,86  | 31,99  | 27,17  | 30,34  | 2,75  |
|                    | 25  | 39,90  | 54,89  | 68,07  | 54,29  | 14,10 | 60,10  | 45,11  | 31,93  | 45,71  | 14,10 |
|                    | 30  | 0,72   | 39,54  | 20,70  | 20,32  | 19,41 | 99,28  | 60,46  | 79,30  | 79,68  | 19,41 |
|                    | 60  | 0,01   | 62,91  | 1,19   | 21,37  | 35,98 | 99,99  | 37,09  | 98,81  | 78,63  | 35,98 |
|                    | 90  | 0,00   | 30,08  | 0,81   | 10,30  | 17,14 | 100,00 | 69,92  | 99,19  | 89,70  | 17,14 |
|                    | 120 | 2,41   | 0,33   | 0,27   | 1,01   | 1,22  | 97,59  | 99,67  | 99,73  | 98,99  | 1,22  |
|                    | 150 | 0,00   | 0,59   | 0,04   | 0,21   | 0,33  | 100,00 | 99,41  | 99,96  | 99,79  | 0,33  |
|                    | 180 | 0,00   | 0,21   | 0,00   | 0,07   | 0,12  | 100,00 | 99,79  | 100,00 | 99,93  | 0,12  |



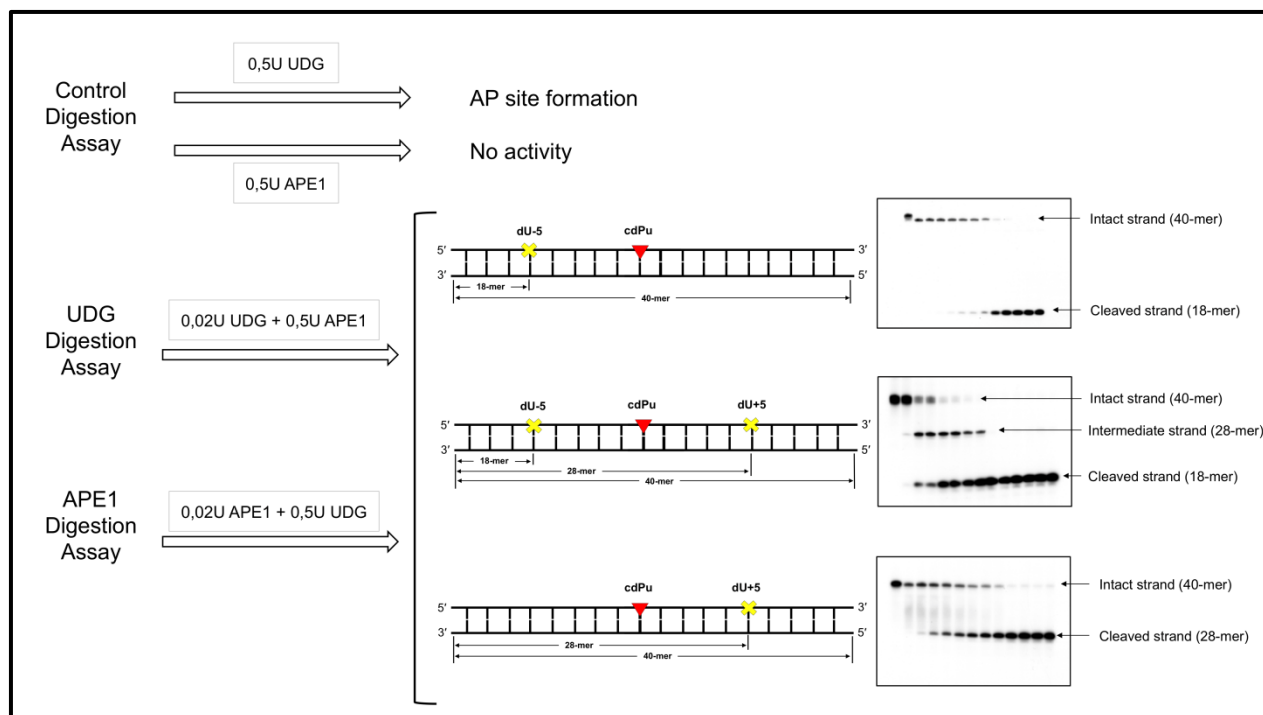

Figure S89. Schematic representation of cleavage assays and control cleavage assays.
